# Supplementary material for: Convergent synthesis of glycoalkaloids solasonine and its saponin derivative
Source: Royal Society of Chemistry journal article supplement (doi:10.1039/d4cc01850h), 2024-01-01

*Electronic Supplementary Information (ESI)*

**Convergent Synthesis of Glycoalkaloids Solasonine and its Saponin  
Derivative**

Yue Yang,<sup>a</sup> Tong Li,<sup>a</sup> Huiran Hao,<sup>a</sup> Juzheng Sheng,<sup>ab</sup> Tianlu Li<sup>\*ab</sup> and Peng Peng<sup>\*ab</sup>

<sup>a</sup>National Glycoengineering Research Center, Shandong Key Laboratory of Carbohydrate Chemistry and Glycobiology, NMPA Key Laboratory for Quality Research and Evaluation of Carbohydrate Based Medicine, Shandong University, Qingdao, 266237 Shandong, China.

<sup>b</sup>Key Laboratory of Chemical Biology, Institute of Biochemical and Biotechnological Drugs, School of Pharmaceutical Sciences, Shandong University, Jinan, 250012 Shandong, China.

\*Emails: litianlu@sdu.edu.cn; pengpeng@sdu.edu.cn

**Table of Contents**

|                                                                                          |            |
|------------------------------------------------------------------------------------------|------------|
| <b>1. General Procedures</b>                                                             | <b>S2</b>  |
| <b>2. Optimization of Trisaccharide 13 Synthesis with Donor 6 and Acceptor 7</b>         | <b>S2</b>  |
| <b>3. Glycosidation of Trichloroacetimidate 4 and Aglycon 5 with Different Catalysts</b> | <b>S4</b>  |
| <b>4. Comparison of the NMR Spectroscopic Data</b>                                       | <b>S6</b>  |
| <b>5. Total Synthesis of Solasonine 1 and Saponin 2</b>                                  | <b>S9</b>  |
| <b>6. References</b>                                                                     | <b>S23</b> |
| <b>7. Copies of NMR Spectra</b>                                                          | <b>S24</b> |

## 1. General Procedures

Material and Methods: All reagents and solvents were dried prior to use according to standard methods. Commercial reagents were used without further purification, unless otherwise stated. NMR spectra were recorded on an AVANCE DRX Bruker-400 MHz, or AVANCE NEO Bruker-600 MHz spectrometer at 25°C and referenced using residual CHCl<sub>3</sub> for <sup>1</sup>H-NMR (δ 7.26 ppm), CDCl<sub>3</sub> for <sup>13</sup>C-NMR (δ 77.0 ppm), and residual Pyridine for <sup>1</sup>H-NMR (δ 7.57 ppm), Pyridine-*d*<sub>5</sub> for <sup>13</sup>C-NMR (δ 135.4 ppm). High-resolution mass spectrometry was performed on a Bruker Maxis-II QTOF. All reactions were performed in flame-dried modified Schlenk (Kjeldahl shape) flasks fitted with a glass stopper or rubber septa under a positive pressure of argon. Analytical TLC was performed on silica gel 60-F254 precoated on aluminum plates (E. Merck), with detection by fluorescence and/or by staining with acidic ceric ammonium molybdate. Column chromatography was performed employing Silica Gel (Qingdao Ocean) 100-200 mesh (for *O*-glycosyl trichloroacetimidates donor) or 200-300 mesh.

## 2. Optimization of Trisaccharide 13 Synthesis with Donor 6 and Acceptor 7.

**Table 1** Optimization Reaction Conditions for Trisaccharide 13 Synthesis<sup>a</sup>.

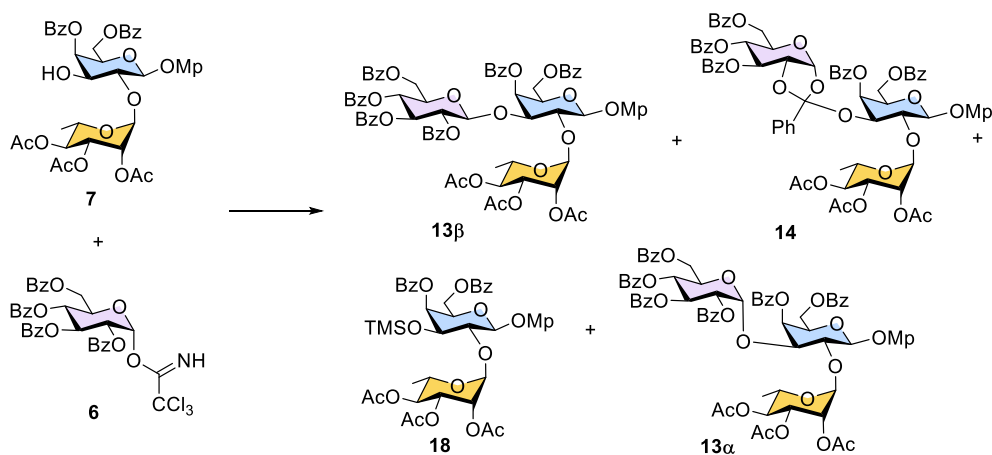

| entry          | catalyst (equiv)                        | molecular sieves | concentration | yield(%) <sup>b</sup> |    |
|----------------|-----------------------------------------|------------------|---------------|-----------------------|----|
|                |                                         |                  |               | 13                    | 14 |
| 1              | TMSOTf (0.1)                            | 4Å               | 0.03          | 69                    | 28 |
| 2 <sup>c</sup> | TMSOTf (0.1)                            | 4Å               | 0.03          | no desired product    |    |
| 3              | BF <sub>3</sub> ·OEt <sub>2</sub> (0.1) | 4Å               | 0.03          | no reaction           |    |
| 4 <sup>c</sup> | TfOH (0.1)                              | 4Å               | 0.03          | 0                     | 85 |
| 5 <sup>d</sup> | TMSOTf (0.1)                            | 4Å               | 0.2           | 90                    | 0  |
| 6 <sup>e</sup> | TMSOTf (0.1)                            | 5Å               | 0.2           | 93                    | 0  |

<sup>a</sup> Reaction condition: **6** (1.0 equiv.), **7** (0.8 equiv.), 0 °C, anhydrous DCM. <sup>b</sup> Isolation yield. <sup>c</sup> Inverse procedure. <sup>d</sup> 7% of **13a** was also isolated. <sup>e</sup> 5% of **13a** was also isolated.

#### **Normal procedure:**

To a solution of glycosyl donor **6** (1.0 equiv.), glycosyl acceptor **7** (0.8 equiv.) and 4 Å (or 5 Å) molecular sieves in anhydrous DCM at 0 °C under argon atmosphere was added catalyst (0.1 equivalents of TMSOTf or BF<sub>3</sub>·OEt<sub>2</sub>). The reaction was further stirred at this temperature for 40 min. After the TLC analysis showed the reaction was complete, the reaction was quenched by addition of triethylamine and diluted with 100 mL of DCM. Then the precipitate was filtered off through a pad of Celite. The organic layer was washed with NaHCO<sub>3</sub> (aq.) and brine, dried over Na<sub>2</sub>SO<sub>4</sub>, filtered, and concentrated. The residue was purified by column chromatography (petroleum ether/DCM/ethyl acetate = 6:6:1) on silica gel to afford trisaccharide **13** or orthoester **14**.

#### **Inverse procedure:**

To a solution of glycosyl acceptor **7** (0.8 equiv.) and 4 Å molecular sieves in anhydrous DCM (2.2 mL) at 0 °C under argon atmosphere was added catalyst (0.1 equivalents of TfOH or TMSOTf) as added to the solution. After being stirred for 15min at 0 °C, glycosyl donor **6** (1.0 equiv.) was added to the solution. The reaction was further stirred at this temperature for 40 min. After the TLC analysis showed the reaction was complete, the reaction was quenched by addition of triethylamine and diluted with 100 mL of DCM. Then the precipitate was filtered off through a pad of Celite. The organic layer was washed with NaHCO<sub>3</sub> (aq.) and brine, dried over Na<sub>2</sub>SO<sub>4</sub>, filtered, and concentrated. The residue was purified by column chromatography (petroleum ether/DCM/ethyl acetate = 6:6:1) on silica gel to afford trisaccharide **13** or orthoester **14**.

### **3. Glycosidation of Trichloroacetimidate **4** and Aglycon **5** with Different Catalysts**

**Table 2.** Glycosidation of Aglycon **5** as Acceptor and Trichloroacetimidate **4**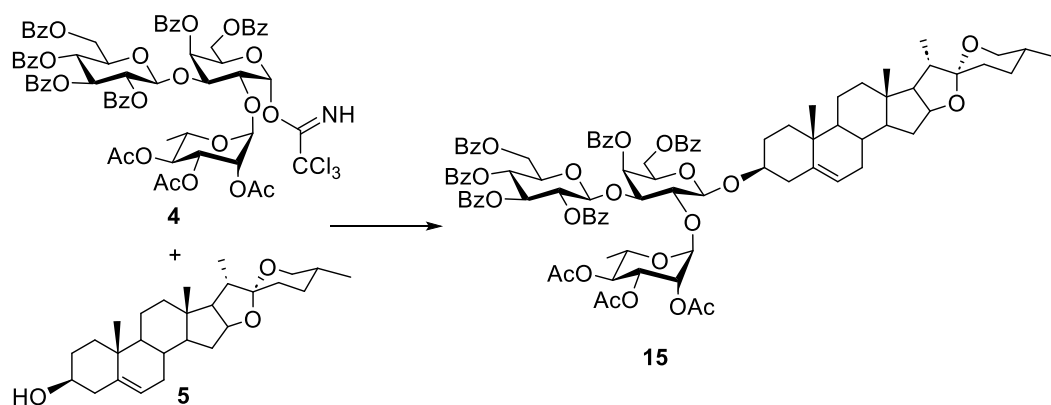

| entry | promoter (equiv)        | solvent                | temp (°C) | Time   | yield (%) | ratio of <b>15</b> ( $\alpha$ : $\beta$ ) |
|-------|-------------------------|------------------------|-----------|--------|-----------|-------------------------------------------|
| 1     | TfOH (0.3)              | DCM/MeCN=1/1           | -50       | 45 min | 81%       | 1/4.0                                     |
| 2     | AuCl <sub>3</sub> (0.1) | DCM                    | -60       | 10 min | 80%       | 1/6.3                                     |
| 3     | PtCl <sub>4</sub> (0.1) | DCM                    | -60       | 12 h   | 91%       | 1/13.1                                    |
| 4     | AuCl <sub>3</sub> (0.1) | DCM/ <i>t</i> BuCN=5/1 | -50       | 10 min | 84%       | $\beta$                                   |

**For TfOH as catalyst:**

To a solution of donor **4** (30 mg, 22.2  $\mu$ mol) and 4 Å molecular sieves in solvent of DCM/MeCN = 1:1 (2.2 mL, 0.01M) was added acceptor **5** (11 mg, 26.1  $\mu$ mol) at room temperature. After the reaction mixture cooling down to -50 °C, TfOH (1.1  $\mu$ L, 6.66  $\mu$ mol) was added into the reaction. After the TLC analysis showed the reaction was complete (45 min), the reaction was quenched by addition of triethylamine and diluted with 50 mL of DCM. Then the precipitate was filtered off through a pad of Celite. The residue was purified by column chromatography (petroleum ether/ethyl acetate = 3:1) on silica gel to afford compound **15 $\alpha\beta$**  (29 mg,  $\alpha/\beta$ =1/4.0, 81%) as semisolid.

**For AuCl<sub>3</sub> as catalyst:**

To a solution of donor **4** (30 mg, 22.2  $\mu$ mol) and 4 Å molecular sieves in solvent of DCM (2.2 mL, 0.01M) was added acceptor **5** (11 mg, 26.1  $\mu$ mol) at room temperature. After the reaction mixture cooling down to -60 °C, AuCl<sub>3</sub> (0.7 mg, 2.22  $\mu$ mol) was added into the reaction. After the TLC analysis showed the reaction was complete (10

min), the reaction was quenched by addition of triethylamine and diluted with 50 mL of DCM. Then the precipitate was filtered off through a pad of Celite. The residue was purified by column chromatography (petroleum ether/ethyl acetate = 3:1) on silica gel to afford compound **15 $\alpha$  $\beta$**  (28.7 mg,  $\alpha/\beta=1/6.3$ , 80%) as semisolid.

**For PtCl<sub>4</sub> as catalyst:**

To a solution of donor **4** (50 mg, 36.2  $\mu$ mol) and 4 Å molecular sieves in solvent of DCM (1.0 mL, 0.036 M) was added acceptor **5** (19 mg, 43.4  $\mu$ mol) at room temperature. After the reaction mixture cooling down to -60 °C, PtCl<sub>4</sub> (1.2 mg, 3.62  $\mu$ mol) was added into the reaction. After the TLC analysis showed the reaction was complete (12 h), the reaction was quenched by addition of triethylamine and diluted with 50 mL of DCM. Then the precipitate was filtered off through a pad of Celite. The residue was purified by column chromatography (petroleum ether/ethyl acetate = 3:1) on silica gel to afford compound **15 $\alpha$  $\beta$**  (53.7 mg,  $\alpha/\beta=1/13.1$ , 91%) as semisolid.

**Catalysis of AuCl<sub>3</sub>-*t*BuCN system:**

To a solution of donor **4** (50 mg, 36.2  $\mu$ mol) and 4 Å molecular sieves in solvent of DCM/*t*BuCN (3.6 mL, v/v =5:1, 0.01M) was added acceptor **5** (19 mg, 43.4  $\mu$ mol) at room temperature. After the reaction mixture cooling down to -50 °C, gold(III) chloride (1.1 mg, 3.62 $\mu$ mol) was added into the reaction. After the TLC analysis showed the reaction was complete (10 min), the reaction was quenched by addition of triethylamine and diluted with 50 mL of DCM. Then the precipitate was filtered off through a pad of Celite. The residue was purified by column chromatography (petroleum ether/ethyl acetate = 3:1) on silica gel to afford compound **15 $\beta$**  (49.6 mg, 84%) as semisolid.

#### 4. NMR Data for Synthetic Solasonine 1 or Saponin 2 and Natural Product

**Table S3:** Comparison of the  $^1\text{H}$  NMR spectroscopic data (400 MHz, Pyridine- $d_5$ ) of

the synthetic and authentic Solasonine **1**<sup>1</sup>.

| Position | Synthetic <b>1</b> | Authentic <b>1</b> | Position | Synthetic <b>1</b> | Authentic <b>1</b> |
|----------|--------------------|--------------------|----------|--------------------|--------------------|
| Gal      |                    |                    | 1        | 1.74, 1.01         | 1.72, 0.98         |
| 1'       | 4.89 (d, 7.8)      | 4.93               | 2        | 1.82, 2.08         | 1.85, 2.10         |
| 2'       | 3.94               | 3.97               | 3        | 3.93               | 3.97               |
| 3'       | 4.31               | 4.34               | 4        | 2.73, 2.79         | 2.74, 2.83         |
| 4'       | 4.87               | 4.90               | 6        | 5.28 (d, 5)        | 5.37               |
| 5'       | 3.99               | 4.12               | 7        | 1.51, 1.86         | 1.54, 1.90         |
| 6'       | 4.20, 4.31         | 4.24, 4.34         | 8        | 1.50               | 1.54               |
| Rha      |                    |                    | 9        | 0.86               | 0.90               |
| 1''      | 6.25 (d, 1.4)      | 6.23               | 11       | 1.41, 1.40         | 1.45, 1.45         |
| 2''      | 4.90               | 4.90               | 12       | 1.07, 1.66         | 1.10, 1.70         |
| 3''      | 4.56(dd, 9.3, 3.4) | 4.60               | 14       | 1.06               | 1.10               |
| 4''      | 4.31               | 4.34               | 15       | 1.50, 2.05         | 1.54, 2.10         |
| 5''      | 4.90               | 4.90               | 16       | 4.52               | 4.51               |
| 6''      | 1.66 (d, 6.1)      | 1.69               | 17       | 1.79               | 1.83               |
| Glu      |                    |                    | 18       | 0.85               | 0.88               |
| 1'''     | 5.15 (d, 7.7)      | 5.15               | 19       | 1.01               | 1.06               |
| 2'''     | 4.66 (9.6, 7.8)    | 4.67               | 20       | 1.97               | 2.01               |
| 3'''     | 4.22               | 4.24               | 21       | 1.15               | 1.17               |
| 4'''     | 4.11               | 4.09               | 23       | 1.66               | 1.70               |
| 5'''     | 3.96               | 3.97               | 24       | 1.62               | 1.65               |
| 6'''     | 4.33, 4.44         | 4.34, 4.49         | 25       | 1.44               | 1.48               |
|          |                    |                    | 26       | 2.79               | 2.83               |
|          |                    |                    | 27       | 0.77 (d, 4.5)      | 0.81               |

**Table S4:** Comparison of the  $^{13}\text{C}$  NMR spectroscopic data (150 MHz, Pyridine- $d_5$ ) of the synthetic and authentic Solasonine **1** <sup>2</sup>.

| Position | Synthetic <b>1</b> | Authentic <b>1</b> | Position | Synthetic <b>1</b> | Authentic <b>1</b> |
|----------|--------------------|--------------------|----------|--------------------|--------------------|
| Gal      |                    |                    | 1        | 37.4               | 37.6               |
| 1'       | 100.3              | 100.4              | 2        | 30.0               | 30.2               |
| 2'       | 76.4               | 76.6               | 3        | 78.4               | 78.6               |
| 3'       | 84.7               | 84.8               | 4        | 38.7               | 38.8               |
| 4'       | 70.4               | 70.5               | 5        | 140.8              | 140.9              |
| 5'       | 75.0               | 75.2               | 6        | 121.7              | 121.8              |
| 6'       | 62.5               | 62.6               | 7        | 32.5               | 32.7               |
| Rha      |                    |                    | 8        | 31.6               | 32.4               |
| 1''      | 102.2              | 102.3              | 9        | 50.2               | 50.3               |
| 2''      | 72.5               | 72.7               | 10       | 37.1               | 37.2               |
| 3''      | 72.8               | 72.9               | 11       | 21.0               | 21.2               |
| 4''      | 74.1               | 74.2               | 12       | 39.9               | 40.1               |
| 5''      | 69.4               | 69.5               | 13       | 40.6               | 40.7               |
| 6''      | 18.5               | 18.7               | 14       | 56.5               | 56.7               |
| Glu      |                    |                    | 15       | 31.6               | 31.6               |
| 1'''     | 105.8              | 105.9              | 16       | 79.2               | 79.9               |
| 2'''     | 74.9               | 75.0               | 17       | 63.3               | 63.5               |
| 3'''     | 78.3               | 78.4               | 18       | 16.4               | 16.6               |
| 4'''     | 71.5               | 71.6               | 19       | 19.3               | 19.4               |
| 5'''     | 77.4               | 77.5               | 20       | 41.6               | 41.6               |
| 6'''     | 62.5               | 62.6               | 21       | 15.6               | 15.7               |
|          |                    |                    | 22       | 98.3               | 98.4               |
|          |                    |                    | 23       | 34.4               | 34.7               |
|          |                    |                    | 24       | 31.2               | 31.1               |
|          |                    |                    | 25       | 31.6               | 31.7               |
|          |                    |                    | 26       | 47.7               | 48.1               |
|          |                    |                    | 27       | 19.5               | 19.8               |

**Table S5:** Comparison of the  $^{13}\text{C}$  NMR spectroscopic data (100 MHz, Pyridine- $d_5$ ) of the synthetic and authentic Saponin **2** <sup>3</sup>.

| Position | Synthetic <b>2</b> | Authentic <b>2</b> | Position | Synthetic <b>2</b> | Authentic <b>2</b> |
|----------|--------------------|--------------------|----------|--------------------|--------------------|
| Gal      |                    |                    | 1        | 37.3               | 37.4               |
| 1'       | 100.2              | 100.4              | 2        | 29.8               | 29.9               |
| 2'       | 76.3               | 76.5               | 3        | 78.2               | 78.3               |
| 3'       | 84.7               | 84.8               | 4        | 38.6               | 38.7               |
| 4'       | 70.2               | 70.8               | 5        | 140.7              | 140.8              |
| 5'       | 75.1               | 74.9               | 6        | 121.6              | 121.7              |
| 6'       | 62.3               | 62.5               | 7        | 32.1               | 32.2               |
| Rha      |                    |                    | 8        | 31.5               | 31.6               |
| 1''      | 101.9              | 102.2              | 9        | 50.1               | 50.2               |
| 2''      | 72.4               | 72.5               | 10       | 37.0               | 37.1               |
| 3''      | 72.7               | 72.8               | 11       | 20.9               | 21.0               |
| 4''      | 73.8               | 74.1               | 12       | 39.7               | 39.8               |
| 5''      | 69.2               | 69.4               | 13       | 40.3               | 40.8               |
| 6''      | 18.4               | 18.6               | 14       | 56.5               | 56.6               |
| Glu      |                    |                    | 15       | 32.1               | 32.3               |
| 1'''     | 105.7              | 105.9              | 16       | 81.0               | 81.8               |
| 2'''     | 74.8               | 75.0               | 17       | 62.7               | 62.9               |
| 3'''     | 78.2               | 78.3               | 18       | 16.2               | 16.3               |
| 4'''     | 71.6               | 71.6               | 19       | 19.2               | 19.4               |
| 5'''     | 78.2               | 78.5               | 20       | 41.8               | 41.9               |
| 6'''     | 62.7               | 62.6               | 21       | 14.9               | 15.0               |
|          |                    |                    | 22       | 109.1              | 109.2              |
|          |                    |                    | 23       | 30.0               | 30.1               |
|          |                    |                    | 24       | 29.8               | 29.9               |
|          |                    |                    | 25       | 30.4               | 30.6               |
|          |                    |                    | 26       | 66.7               | 66.8               |
|          |                    |                    | 27       | 17.2               | 17.3               |



## 5. Total Synthesis of Solasonine 1 and Saponin 2.

### 4-Methoxyphenyl 4,6-*O*-benzylidene-3-*O*-*tert*-butyldimethylsilyl- $\beta$ -D-galactopyranoside (**10**)

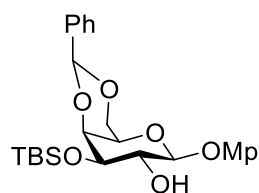

**10**

To a solution of **9** (2 g, 5.3 mmol) in DMF (18 mL) was added 2,6-lutidine (1.9 mL, 15.9 mmol) at room temperature under Ar atmosphere. After being stirred for 20 min at  $-50\text{ }^{\circ}\text{C}$ , TBSOTf (2.4 mL, 10.6 mmol) was added to the solution. After the TLC analysis showed the reaction was complete (25 min), the reaction was quenched with sat.  $\text{NaHCO}_3$  (aq.) and diluted with 200 mL of DCM. The organic layer was washed with  $\text{NaHCO}_3$  (aq.) and brine, dried over  $\text{Na}_2\text{SO}_4$ , filtered, and concentrated. The residue was purified by column chromatography (petroleum ether/ethyl acetate = 6:1) on silica gel to afford compound **10** (2.3 g, 88%) as white solid. Proton NMR was consistent with literature data<sup>4</sup>.

### 4-Methoxyphenyl 2-*O*-(2,3,4-tri-*O*-acetyl- $\alpha$ -L-rhamnopyranosyl)-4,6-*O*-benzylidene-3-*O*-*tert*-butyldimethylsilyl- $\beta$ -D-galactopyranoside (**11**)

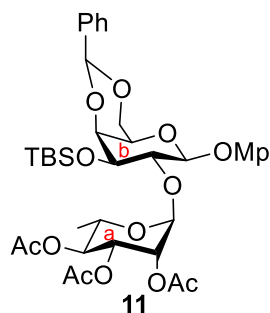

**11**

To a solution of glycosyl donor **8** (3.8 g, 8.8 mmol), glycosyl acceptor **10** (3.9 g, 8.0 mmol) and 4 Å molecular sieves in anhydrous DCM (80 mL) at  $0\text{ }^{\circ}\text{C}$  under argon atmosphere was added TMSOTf (163  $\mu\text{L}$ , 0.9 mmol). The reaction was further stirred at this temperature for 10 min. After the TLC analysis showed the reaction was complete, the reaction was quenched by addition of triethylamine and diluted with 150 mL of DCM. Then the precipitate was filtered off through a pad of Celite. The organic

layer was washed with NaHCO<sub>3</sub> (aq.) and brine, dried over Na<sub>2</sub>SO<sub>4</sub>, filtered, and concentrated. The residue was purified by column chromatography (DCM/MeOH = 20:1) on silica gel to afford compound **11** (5.7 g, 95%) as white solid. <sup>1</sup>H NMR (400 MHz, CDCl<sub>3</sub>) δ 7.53 (dd, *J* = 7.5, 2.2 Hz, 2H, *ArH*), 7.39 – 7.33 (m, 3H, *ArH*), 7.02 – 6.98 (m, 2H, *ArH*), 6.84 – 6.80 (m, 2H, *ArH*), 5.50 (s, 1H, *PhCH*), 5.39 (dd, *J* = 3.4, 1.7 Hz, 1H, 2a-H), 5.27 (d, *J* = 1.6 Hz, 1H, 1b-H), 5.21 (dd, *J* = 10.1, 3.5 Hz, 1H, 3a-H), 5.05 (t, *J* = 10.1 Hz, 1H, 4a-H), 4.90 (d, *J* = 7.9 Hz, 1H, 1a-H), 4.46 – 4.38 (m, 1H, 5a-H), 4.34 (dd, *J* = 12.3, 1.4 Hz, 1H, 6b-H), 4.24 (dd, *J* = 9.4, 7.9 Hz, 1H, 2b-H), 4.07 (td, *J* = 5.3, 4.7, 1.8 Hz, 2H, 6b-H, 4b-H), 3.96 (dd, *J* = 9.4, 3.6 Hz, 1H, 3b-H), 3.78 (s, 3H, OCH<sub>3</sub>), 3.50 (s, 1H, 5b-H), 2.11 (s, 3H, COCH<sub>3</sub>), 2.00 (s, 3H, COCH<sub>3</sub>), 1.96 (s, 3H, COCH<sub>3</sub>), 1.20 (d, *J* = 6.3 Hz, 3H, 6a-CH<sub>3</sub>), 0.86 (s, 9H, *tert-Butyl*), 0.11 (d, *J* = 7.2 Hz, 6H, *SiMe*). <sup>13</sup>C NMR (100 MHz, CDCl<sub>3</sub>) δ 175.0, 174.8, 174.6, 160.1, 156.0, 142.5, 133.6, 132.8, 130.9, 123.3, 119.3, 105.5, 105.2, 103.1, 103.0, 81.1, 79.9, 79.0, 75.7, 74.4, 74.1, 73.9, 71.3, 71.2, 60.4, 30.4, 25.8, 25.84, 25.62, 22.8, 22.0, 0.7. HRMS (ESI) Calcd for C<sub>38</sub>H<sub>52</sub>NaO<sub>14</sub>Si<sup>+</sup> [M+Na]<sup>+</sup>: 783.3019, found: 783.3049.

**4-Methoxyphenyl 2-O-(2,3,4-tri-O-acetyl- $\alpha$ -L-rhamnopyranosyl)- $\beta$ -D-galactopyranoside (12)**

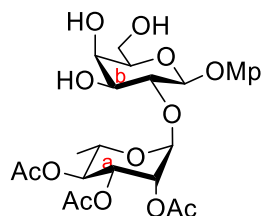

**12**

To a solution of **11** (11 g, 14.5mmol) in TBAF (72.5 mL of 1 M solution in THF, 72.5mmol) was stirred at rt for 1 h, After the TLC analysis showed the reaction was complete. The solution was diluted with ethyl acetate and washed with NH<sub>4</sub>Cl (aq.) and brine, dried over Na<sub>2</sub>SO<sub>4</sub>, filtered, and concentrated. The resulting residue was dissolved in 200 mL 80% AcOH, the mixture was stirred for 1 h at 90 °C. After the TLC analysis showed the reaction was complete, and then cooled, and concentrated. The residue was purified by column chromatography (EtOAc/CH<sub>3</sub>OH = 10:1) on silica gel to afford compound **12** (7.2 g, 89%) as white solid. <sup>1</sup>H NMR (400 MHz, CDCl<sub>3</sub>) δ

7.01 – 6.95 (m, 2H, *ArH*), 6.87 – 6.80 (m, 2H, *ArH*), 5.37 (dd,  $J = 3.4, 1.8$  Hz, 1H, 2a-H), 5.32 (d,  $J = 1.8$  Hz, 1H, 1a-H), 5.22 (dd,  $J = 10.2, 3.4$  Hz, 1H, 3a-H), 5.08 (t,  $J = 10.0$  Hz, 1H, 4a-H), 4.87 (d,  $J = 7.7$  Hz, 1H, 1b-H), 4.27 (dt,  $J = 9.8, 6.2$  Hz, 1H, 5a-H), 4.04 – 3.80 (m, 4H, 2b-H, 3b-H, 6b-H), 3.78 (s, 3H,  $OCH_3$ ), 3.60 (t,  $J = 5.3$  Hz, 1H, 5b-H), 3.52 – 3.42 (m, 2H, 4b-H), 2.66 (s, 1H), 2.14 (s, 3H,  $COCH_3$ ), 2.02 (s, 3H,  $COCH_3$ ), 1.98 (s, 3H,  $COCH_3$ ), 1.21 (d,  $J = 6.2$  Hz, 3H, 6a- $CH_3$ ).  $^{13}C$  NMR (100 MHz,  $CDCl_3$ )  $\delta$  170.7, 170.5, 170.0, 155.2, 151.0, 117.7, 114.6, 100.3, 98.0, 76.1, 74.3, 70.9, 69.7, 69.5, 69.3, 66.5, 61.3, 55.6, 20.8, 20.73, 20.70, 17.3. HRMS (ESI) Calcd for  $C_{25}H_{34}NaO_{14}^+$  [ $M+Na$ ] $^+$ : 581.1841, found: 581.1893.

**4-Methoxyphenyl 2-*O*-(2,3,4-tri-*O*-acetyl- $\alpha$ -L-rhamnopyranosyl)-4,6-di-*O*-benzoyl- $\beta$ -D-galactopyranoside (7)**

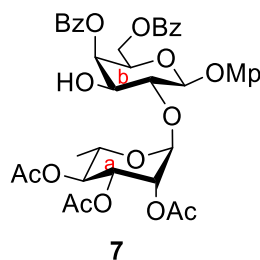

To a solution of **12** (7.1 g, 12.7 mmol) and 4 Å molecular sieves in 255 mL mixture of DCM/DMF = 3:1 was added benzoyl cyanide (3.7 g, 27.9 mmol) at room temperature under argon atmosphere. After cooling down the reaction mixture to  $-78$  °C, DMAP (379 mg, 3.1 mmol) was added. The reaction was further stirred for 5 h at this temperature. After the TLC analysis showed the reaction was complete, the reaction was quenched by addition of  $NH_4Cl$  (s) and MeOH. Then the mixture was filtered through a pad of Celite and the Celite was further washed with DCM for 3 times. Then the organic layer was concentrated. The residue was purified by column chromatography (petroleum ether/ethyl acetate = 1:3) on silica gel to afford compound **7** (7.8 g, 80 %) as white solid.  $^1H$  NMR (400 MHz,  $CDCl_3$ )  $\delta$  8.13 – 8.08 (m, 2H, *ArH*), 8.05 – 8.00 (m, 2H, *ArH*), 7.59 – 7.53 (m, 2H, *ArH*), 7.43 (td,  $J = 7.7, 1.4$  Hz, 4H, *ArH*), 7.06 – 7.01 (m, 2H, *ArH*), 6.75 – 6.69 (m, 2H, *ArH*), 5.66 – 5.63 (m, 1H, 4b-H), 5.39 (dd,  $J = 3.5, 1.8$  Hz, 1H, 2a-H), 5.32 (d,  $J = 1.8$  Hz, 1H, 1a-H), 5.24 (dd,  $J = 10.1, 3.4$  Hz, 1H, 3a-H), 5.10 (t,  $J = 10.0$  Hz, 1H, 4a-H), 4.99 (d,  $J = 6.8$  Hz, 1H, 1b-H), 4.54 –

4.44 (m, 2H, 6b-H), 4.40 (dt,  $J = 9.9, 6.2$  Hz, 1H, 5a-H), 4.22 – 4.11 (m, 3H, 2b-H, 3b-H, 5b-H), 3.74 (s, 3H, OCH<sub>3</sub>), 2.06 (s, 3H, COCH<sub>3</sub>), 2.03 (s, 3H, COCH<sub>3</sub>), 1.96 (s, 3H, COCH<sub>3</sub>), 1.29 (d,  $J = 6.2$  Hz, 3H, 6a-CH<sub>3</sub>). <sup>13</sup>C NMR (100 MHz, CDCl<sub>3</sub>)  $\delta$  170.4, 170.2, 170.0, 166.8, 166.0, 155.4, 151.1, 130.1, 129.8, 128.5, 128.4, 118.1, 114.6, 100.5, 98.3, 75.9, 73.6, 71.5, 71.0, 70.9, 69.6, 69.4, 66.6, 62.7, 55.6, 20.84, 20.82, 20.75, 17.4. HRMS (ESI) Calcd for C<sub>39</sub>H<sub>42</sub>NaO<sub>16</sub><sup>+</sup> [M+Na]<sup>+</sup>: 789.2366, found: 789.2395.

**4-Methoxyphenyl 2-O-(2,3,4-tri-O-acetyl- $\alpha$ -L-rhamnopyranosyl)-3-O-(2,3,4,6-tetra-O-benzoyl- $\beta$ -D-glucopyranosyl)-4,6-di-O-benzoyl- $\beta$ -D-galactopyranoside (13 $\beta$ )**

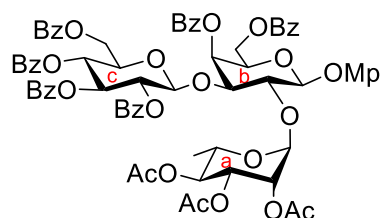

**13 $\beta$**

To a solution of glycosyl donor **6** (384 mg, 519  $\mu$ mol), glycosyl acceptor **7** (766 mg, 415  $\mu$ mol) and 5 Å molecular sieves in anhydrous DCM (2.6 mL) at 0 °C under argon atmosphere was added TMSOTf (9.4  $\mu$ L, 51.9  $\mu$ mol). The reaction was further stirred at this temperature for 40 min. After the TLC analysis showed the reaction was complete, the reaction was quenched by addition of triethylamine and diluted with 100 mL of DCM. Then the precipitate was filtered off through a pad of Celite. The organic layer was washed with NaHCO<sub>3</sub> (aq.) and brine, dried over Na<sub>2</sub>SO<sub>4</sub>, filtered, and concentrated. The residue was purified by column chromatography (petroleum ether/DCM/ethyl acetate = 6:6:1) on silica gel to afford compound **13 $\beta$**  (500 mg, 93%) as white solid. <sup>1</sup>H NMR (400 MHz, CDCl<sub>3</sub>)  $\delta$  8.03 (dd,  $J = 14.9, 8.0$  Hz, 6H, ArH), 7.92 (d,  $J = 7.8$  Hz, 2H, ArH), 7.75 (d,  $J = 7.8$  Hz, 2H ArH), 7.67 – 7.18 (m, 18H ArH), 6.99 – 6.91 (m, 2H ArH), 6.70 – 6.61 (m, 2H ArH), 6.01 (t,  $J = 9.6$  Hz, 1H, 3c-H), 5.75 – 5.63 (m, 2H, 4b-H, 4c-H), 5.41 (dd,  $J = 9.9, 7.8$  Hz, 1H, 2c-H), 5.38 – 5.35 (m, 1H, 2a-H), 5.31 (dd,  $J = 10.2, 3.5$  Hz, 1H, 3a-H), 5.27 (d,  $J = 7.9$  Hz, 1H, 1c-H), 5.24 (d,  $J = 1.8$  Hz, 1H, 1a-H), 5.11 (t,  $J = 10.0$  Hz, 1H, 4a-H), 4.75 (d,  $J = 7.3$  Hz, 1H, 1b-H), 4.65 (dd,  $J = 12.2, 4.9$  Hz, 1H, 6c-H), 4.56 (dd,  $J = 12.2, 3.2$  Hz, 1H, 6c-H), 4.45 (qd,

$J = 11.6, 6.2$  Hz, 2H, 6b-H), 4.34 – 4.16 (m, 5H, 3b-H, 2b-H, 5c-H, 5b-H, 5a-H), 3.98 (dd,  $J = 8.0, 4.7$  Hz, 1H), 3.71 (s, 3H,  $\text{OCH}_3$ ), 2.14 (s, 3H,  $\text{COCH}_3$ ), 2.09 (s, 3H,  $\text{COCH}_3$ ), 2.05 (s, 2H,  $\text{COCH}_3$ ), 1.13 (d,  $J = 6.2$  Hz, 3H, 6a- $\text{CH}_3$ ).  $^{13}\text{C}$  NMR (100 MHz,  $\text{CDCl}_3$ )  $\delta$  170.3, 170.1, 170.0, 166.0, 165.9, 165.7, 165.5, 165.1, 164.7, 155.4, 151.0, 118.1, 114.4, 100.6, 99.4, 97.8, 75.5, 72.54, 72.51, 71.8, 70.9, 70.0, 69.9, 69.8, 69.0, 67.0, 62.9, 62.7, 55.6, 20.9, 17.3. HRMS (ESI) Calcd for  $\text{C}_{73}\text{H}_{68}\text{NaO}_{25}^+$   $[\text{M}+\text{Na}]^+$ : 1367.3942, found: 1367.3985.

**4-Methoxyphenyl 2-O-(2,3,4-tri-O-acetyl- $\alpha$ -L-rhamnopyranosyl)-3-O-(2,3,4,6-tetra-O-benzoyl- $\alpha$ -D-glucopyranosyl)-4,6-di-O-benzoyl- $\beta$ -D-galactopyranoside (13 $\alpha$ )**

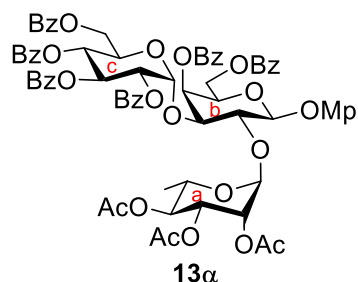

$^1\text{H}$  NMR (400 MHz,  $\text{CDCl}_3$ )  $\delta$  8.18 – 8.11 (m, 2H, ArH), 8.09 – 8.04 (m, 2H, ArH), 8.05 – 7.98 (m, 2H, ArH), 7.78 – 7.72 (m, 2H, ArH), 7.70 – 7.63 (m, 2H, ArH), 7.63 – 7.52 (m, 3H, ArH), 7.47 (t,  $J = 7.6$  Hz, 4H, ArH), 7.41 – 7.24 (m, 8H, ArH), 7.21 (t,  $J = 7.6$  Hz, 2H, ArH), 7.05 (td,  $J = 7.7, 4.3$  Hz, 4H, ArH), 7.01 – 6.93 (m, 2H, ArH), 6.75 – 6.67 (m, 2H, ArH), 5.90 (t,  $J = 10.0$  Hz, 1H, 3c-H), 5.83 (d,  $J = 2.8$  Hz, 1H, 4b-H), 5.76 (d,  $J = 4.3$  Hz, 1H, 1c-H), 5.66 – 5.57 (m, 2H, 2c-H, 4c-H), 5.52 (d,  $J = 1.7$  Hz, 1H, 1a-H), 5.38 - 5.41 (m, 2H, 2a-H, 3a-H), 5.21 (t,  $J = 10.0$  Hz, 1H, 4a-H), 4.70 – 4.57 (m, 3H, 6a-H, 5a-H), 4.55 (d,  $J = 7.7$  Hz, 1H, 1b-H), 4.50 – 4.25 (m, 4H, 2b-H, 5b-H, 6b-H), 4.16 (dd,  $J = 9.8, 2.9$  Hz, 1H, 3b-H), 3.76 (m, 4H,  $\text{OCH}_3$ ), 2.22 (s, 3H,  $\text{COCH}_3$ ), 2.05 (s, 3H,  $\text{COCH}_3$ ), 1.88 (s, 3H,  $\text{COCH}_3$ ), 1.29 (d,  $J = 6.3$  Hz, 3H, 6a- $\text{CH}_3$ ).  $^{13}\text{C}$  NMR (100 MHz,  $\text{CDCl}_3$ )  $\delta$  170.00, 169.96, 169.8, 165.8, 165.25, 165.23, 165.0, 155.5, 150.9, 133.3, 133.1, 132.9, 132.8, 130.4, 129.94, 129.88, 129.83, 129.79, 129.7, 129.5, 129.1, 128.8, 128.51, 128.48, 128.4, 128.2, 128.1, 128.0, 118.4, 114.5, 100.7, 98.7, 91.5, 75.1, 73.0, 71.6, 71.2, 71.0, 70.2, 69.43, 69.38, 69.3, 69.0, 66.9, 64.7, 62.8, 62.4, 55.6, 20.9,

20.7, 17.4. HRMS (ESI) Calcd for  $C_{73}H_{68}NaO_{25}^+$   $[M+Na]^+$ : 1367.3942, found: 1367.3934.

### Orthoester 14

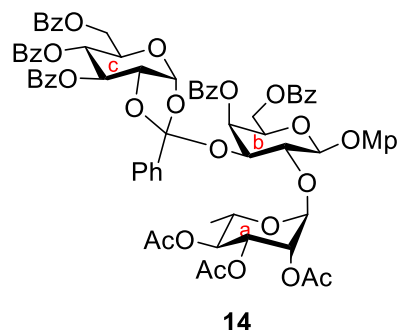

$^1H$  NMR (400 MHz,  $CDCl_3$ )  $\delta$  8.01 (ddd,  $J = 8.6, 4.8, 1.3$  Hz, 4H, ArH), 7.95 (td,  $J = 7.5, 7.0, 1.4$  Hz, 4H, ArH), 7.84 – 7.80 (m, 2H, ArH), 7.69 – 7.36 (m, 10H, ArH), 7.34 – 7.23 (m, 5H, ArH), 6.94 – 6.88 (m, 2H, ArH), 6.59 – 6.53 (m, 2H, ArH), 5.86 (d,  $J = 4.9$  Hz, 1H, 1c-H), 5.79 (d,  $J = 3.2$  Hz, 1H, 4b-H), 5.54 (dd,  $J = 3.3, 1.4$  Hz, 1H, 3c-H), 5.38 (t,  $J = 2.2$  Hz, 1H, 3a-H), 5.33 – 5.28 (m, 2H, 1a-H, 2a-H), 5.15 – 5.07 (m, 2H, 4c-H, 4a-H), 4.82 (d,  $J = 7.8$  Hz, 1H, 1b-H), 4.60 (dd,  $J = 11.8, 3.6$  Hz, 1H, 6c-H), 4.53 – 4.45 (m, 2H, 2c-H, 5a-H), 4.42 – 4.21 (m, 4H, 2b-H, 6b-H, 5c-H), 4.08 (dd,  $J = 9.0, 3.6$  Hz, 1H, 6c-H), 3.90 (dd,  $J = 9.6, 3.2$  Hz, 1H, 3b-H), 3.81 (t,  $J = 3.0$  Hz, 1H, 5b-H), 3.67 (s, 3H,  $OCH_3$ ), 2.15 (s, 3H,  $COCH_3$ ), 2.02 (s, 3H,  $COCH_3$ ), 1.94 (s, 3H,  $COCH_3$ ), 1.28 (d,  $J = 6.5$  Hz, 3H, 6a- $CH_3$ ).  $^{13}C$  NMR (100 MHz,  $CDCl_3$ )  $\delta$  170.0, 169.9, 166.1, 166.0, 165.9, 165.0, 164.3, 155.3, 150.9, 134.6, 133.6, 133.5, 133.4, 133.2, 133.0, 130.3, 130.0, 129.9, 129.85, 129.78, 129.74, 129.71, 129.02, 128.99, 128.9, 128.7, 128.5, 128.4, 128.4, 128.2, 126.1, 122.4, 118.1, 114.4, 100.4, 98.1, 97.6, 75.4, 72.8, 72.3, 72.0, 71.1, 70.5, 69.4, 69.3, 68.7, 68.1, 66.6, 64.0, 63.3, 55.5, 20.9, 20.8, 20.7, 17.4. HRMS (ESI) Calcd for  $C_{73}H_{68}NaO_{25}^+$   $[M+Na]^+$ : 1367.3942, found: 1367.3937.

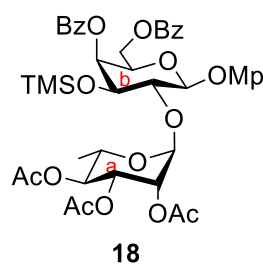

**4-Methoxyphenyl**

**2-O-(2,3,4-tri-O-acetyl- $\alpha$ -L-rhamnopyranosyl)-3-O-**

**trimethylsilyl-4,6-di-*O*-benzoyl- $\beta$ -D-galactopyranoside (18)**

$^1\text{H}$  NMR (600 MHz,  $\text{CDCl}_3$ )  $\delta$  8.13 – 8.09 (m, 2H, ArH), 8.05 – 8.01 (m, 2H, ArH), 7.62 – 7.56 (m, 2H, ArH), 7.49 – 7.43 (m, 4H, ArH), 7.01 – 6.97 (m, 2H, ArH), 6.69 – 6.65 (m, 2H, ArH), 5.56 (dd,  $J = 3.6, 1.1$  Hz, 1H, 4b-H), 5.35 (dd,  $J = 3.4, 1.8$  Hz, 1H, 2a-H), 5.25 (dd,  $J = 10.2, 3.4$  Hz, 1H, 3a-H), 5.22 (d,  $J = 1.7$  Hz, 1H, 1a-H), 5.10 (t,  $J = 10.0$  Hz, 1H, 4a-H), 4.96 (d,  $J = 7.8$  Hz, 1H, 1b-H), 4.53 – 4.43 (m, 3H, 5a-H, 6b-H), 4.22 – 4.16 (m, 2H, 2b-H, 5b-H), 4.07 (dd,  $J = 9.3, 3.5$  Hz, 1H, 3b-H), 3.72 (s, 3H,  $\text{OCH}_3$ ), 2.11 (s, 3H,  $\text{COCH}_3$ ), 2.03 (s, 3H,  $\text{COCH}_3$ ), 1.97 (s, 3H,  $\text{COCH}_3$ ), 1.29 (d,  $J = 6.2$  Hz, 3H, 6a- $\text{CH}_3$ ), 0.12 (s, 9H,  $\text{SiMe}$  ( $\times 3$ )).  $^{13}\text{C}$  NMR (150 MHz,  $\text{CDCl}_3$ )  $\delta$  170.10, 170.07, 170.0, 169.7, 166.0, 165.9, 155.3, 151.0, 133.4, 133.2, 130.0, 129.8, 129.6, 129.3, 128.5, 128.4, 118.0, 114.5, 100.3, 98.2, 75.1, 74.1, 71.6, 71.0, 70.7, 69.4, 69.3, 66.5, 62.9, 55.6, 20.81, 20.76, 20.7, 17.4, -0.2. HRMS (ESI) Calcd for  $\text{C}_{42}\text{H}_{54}\text{NO}_{16}\text{Si}^+$   $[\text{M}+\text{NH}_4]^+$ : 856.3207, found: 856.3225;  $\text{C}_{42}\text{H}_{50}\text{NaO}_{16}\text{Si}^+$   $[\text{M}+\text{Na}]^+$ : 861.2761, found: 861.2767.

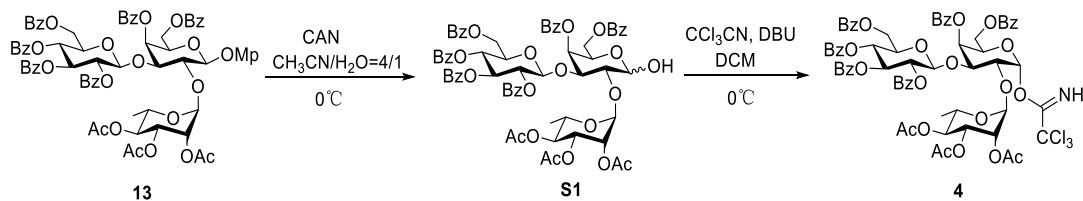

**2-*O*-(2,3,4-tri-*O*-acetyl- $\alpha$ -L-rhamnopyranosyl)-3-*O*-(2,3,4,6-tetra-*O*-benzoyl- $\beta$ -D-glucopyranosyl)-4,6-di-*O*-benzoyl- $\alpha$ -D-galactopyranosyl trichloroacetimidate (4)**

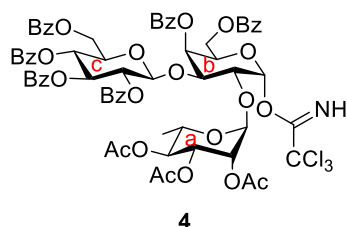

To a solution of **13** (1.1 g, 0.8 mmol) in solvent of  $\text{CH}_3\text{CN}/\text{H}_2\text{O}$  (80 mL, v/v = 4:1), CAN (2.2 g, 4.1 mmol) was added. The mixture was stirred for 15 min at 0 °C. After the TLC analysis showed the reaction was complete, the solution was diluted with ethyl acetate and washed with  $\text{NaHCO}_3$  (aq.) and brine, dried over  $\text{Na}_2\text{SO}_4$ , filtered, and

concentrated. Then the organic layer was concentrated. The residue was purified by column chromatography (petroleum ether/ethyl acetate = 1:1) on silica gel to afford compound **S1** (890 mg, 89 %) as white solid. Compound **S1** (1.6 g, 1.3 mmol) was dissolved in anhydrous DCM, and trichloroacetonitrile (391  $\mu$ L, 3.9 mmol) and DBU (39  $\mu$ L, 260  $\mu$ mol) were added in sequence at 0 °C. The reaction was further stirred for 5 h at this temperature. After the TLC analysis showed the reaction was complete, the reaction was concentrated and purified by column chromatography (petroleum ether/ethyl acetate = 1:1) on silica gel to afford compound **4** (1.4 g, 78 %) as white solid.  $^1\text{H}$  NMR (400 MHz,  $\text{CDCl}_3$ )  $\delta$  8.69 (s, 1H,  $\text{NHCCl}_3$ ), 8.05 – 7.93 (m, 6H, ArH), 7.94 – 7.88 (m, 2H, ArH), 7.76 – 7.71 (m, 2H ArH), 7.56 – 7.29 (m, 11H ArH), 7.21 (td,  $J = 7.8, 2.0$  Hz, 4H ArH), 6.51 (d,  $J = 3.7$  Hz, 1H, 1b-H), 6.03 – 5.95 (m, 2H, 4b-H, 3c-H), 5.70 (t,  $J = 9.7$  Hz, 1H, 4c-H), 5.47 – 5.43 (t, 1H, 2c-H), 5.39 – 5.34 (m, 2H, 1c-H, 2a-H), 5.23 (dd,  $J = 10.2, 3.1$  Hz, 1H, 3a-H), 5.07 (t,  $J = 10.0$  Hz, 1H, 4a-H), 4.88 (d,  $J = 1.8$  Hz, 1H, 1a-H), 4.63 – 4.52 (m, 4H, 5c-H, 3b-H, 6c-H), 4.47 – 4.33 (m, 3H, 5b-H, 6b-H), 4.26 (dd,  $J = 9.9, 3.7$  Hz, 1H, 2b-H), 3.96 – 3.87 (m, 1H, 5a-H), 2.12 (s, 3H,  $\text{COCH}_3$ ), 2.06 (s, 3H,  $\text{COCH}_3$ ), 2.02 (s, 3H,  $\text{COCH}_3$ ), 1.15 (d,  $J = 6.3$  Hz, 3H, 6a- $\text{CH}_3$ ).  $^{13}\text{C}$  NMR (100 MHz,  $\text{CDCl}_3$ )  $\delta$  170.1, 169.8, 169.5, 166.2, 166.0, 165.9, 165.4, 165.3, 165.1, 164.6, 160.8, 133.3, 133.2, 133.13, 133.07, 133.03, 132.96, 132.9, 129.93, 129.86, 129.8, 129.73, 129.66, 129.64, 129.58, 129.5, 129.1, 129.04, 129.03, 128.3, 128.15, 128.10, 99.8, 95.0, 90.8, 72.7, 72.4, 72.3, 71.7, 70.5, 70.1, 69.9, 69.6, 69.4, 69.1, 67.7, 63.0, 62.7, 60.3, 21.0, 20.93, 20.85, 20.82, 20.77, 17.4. HRMS (ESI) Calcd for  $\text{C}_{68}\text{H}_{62}\text{Cl}_3\text{NNaO}_{24}^+$   $[\text{M}+\text{Na}]^+$ : 1404.2620, found: 1404.2660.

**26-azido-pseudodiosgen-3-yl 2-O-(2,3,4-tri-O-acetyl- $\alpha$ -L-rhamnopyranosyl)-3-O-(2,3,4,6-tetra-O-benzoyl- $\beta$ -D-glucopyranosyl)-4,6-di-O-benzoyl- $\beta$ -D-galactopyranoside (16)**



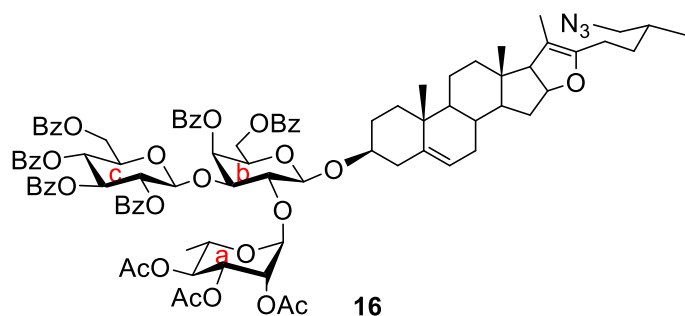

To a solution of donor **4** (50 mg, 36.2  $\mu\text{mol}$ ) and 4 Å molecular sieves in a mixed solvent of DCM/tBuCN (724  $\mu\text{L}$ , v/v = 5:1, 0.05 M) was added acceptor **3** (19 mg, 43.4  $\mu\text{mol}$ ) at room temperature. After the reaction mixture cooling down to  $-50\text{ }^\circ\text{C}$ , gold(III) chloride (1.1 mg, 3.62  $\mu\text{mol}$ ) was added into the reaction. After the TLC analysis showed the reaction was complete (10 min), the reaction was quenched by addition of triethylamine and diluted with 50 mL of DCM. Then the precipitate was filtered off through a pad of Celite. The residue was purified by column chromatography (petroleum ether/ethyl acetate = 1:1) on silica gel to afford compound **16** (48 mg, 81%) as semisolid.  $^1\text{H}$  NMR (400 MHz,  $\text{CDCl}_3$ )  $\delta$  8.06 – 7.95 (m, 7H, ArH), 7.93 – 7.86 (m, 2H, ArH), 7.77 – 7.70 (m, 2H, ArH), 7.64 – 7.58 (m, 2H, ArH), 7.58 – 7.18 (m, 19H, ArH), 5.96 (t,  $J$  = 9.6 Hz, 1H, 3c-H), 5.70 – 5.60 (m, 2H, 4c-H, 4b-H), 5.40 – 5.25 (m, 4H, 3a-H, 2a-H, 2c-H, 5b-H), 5.21 – 5.14 (m, 2H, 1a-H, 1c-H), 5.08 (t,  $J$  = 9.9 Hz, 1H, 4a-H), 4.75 (ddd,  $J$  = 10.1, 7.8, 5.7 Hz, 1H, 6c-H), 4.60 (dd,  $J$  = 12.2, 4.7 Hz, 1H, 6c-H), 4.54 – 4.47 (m, 1H, 6b-H), 4.47 – 4.31 (m, 3H, 5a-H, 6b-H, 1b-H), 4.19 (ddd,  $J$  = 21.5, 8.8, 3.7 Hz, 2H, 5c-H, 3b-H), 3.98 (dd,  $J$  = 9.4, 7.8 Hz, 1H, 2b-H), 3.87 (dd,  $J$  = 7.9, 5.3 Hz, 1H, 5b-H), 3.52 (tt,  $J$  = 11.1, 4.6 Hz, 1H), 3.23 (dd,  $J$  = 12.0, 5.6 Hz, 1H), 3.10 (dd,  $J$  = 12.0, 7.0 Hz, 1H), 2.48 (d,  $J$  = 10.1 Hz, 1H), 2.45 – 2.37 (m, 1H), 2.25 (dd,  $J$  = 28.1, 13.9 Hz, 1H), 2.13 (s, 3H,  $\text{COCH}_3$ ), 2.04 (s, 3H,  $\text{COCH}_3$ ), 2.05 (s, 3H,  $\text{COCH}_3$ ), 1.92 – 1.68 (m, 2H), 1.60 (d,  $J$  = 7.0 Hz, 5H), 1.51 – 1.38 (m, 2H), 1.36 – 1.21 (m, 5H), 1.15 (d,  $J$  = 6.2 Hz, 3H, 6a- $\text{CH}_3$ ), 0.97 (d,  $J$  = 6.7 Hz, 6H), 0.89 (q,  $J$  = 7.1, 5.5 Hz, 3H), 0.68 (s, 3H).  $^{13}\text{C}$  NMR (100 MHz,  $\text{CDCl}_3$ )  $\delta$  170.3, 170.2, 170.0, 166.0, 165.98, 165.96, 165.5, 165.1, 164.7, 151.2, 140.3, 133.3, 133.1, 133.03, 133.00, 132.91, 132.88, 130.1, 130.0, 129.9, 129.88, 129.80, 129.77, 129.71, 129.68, 129.6, 129.1, 129.0, 128.9, 128.4, 128.34, 128.29, 128.2, 128.1, 121.8, 104.0, 100.0, 99.3, 97.2, 84.3, 79.7, 74.0,

72.5, 71.4, 71.1, 70.1, 69.9, 69.7, 69.0, 66.5, 64.2, 62.7, 57.6, 55.0, 50.0, 43.3, 39.5, 38.4, 37.0, 36.8, 34.1, 33.0, 32.2, 31.5, 31.2, 29.71, 29.65, 23.2, 20.95, 20.90, 20.86, 19.3, 17.6, 17.3, 14.0, 11.7. HRMS (ESI) Calcd for  $C_{93}H_{102}N_3O_{25}^+$   $[M+H]^+$ : 1661.6831, found: 1661.6881.

**Solasodin-3-yl 2-O-(2,3,4-tri-O-acetyl- $\alpha$ -L-rhamnopyranosyl)-3-O-(2,3,4,6-tetra-O-benzoyl- $\beta$ -D-glucopyranosyl)-4,6-di-O-benzoyl- $\beta$ -D-galactopyranoside (17)**

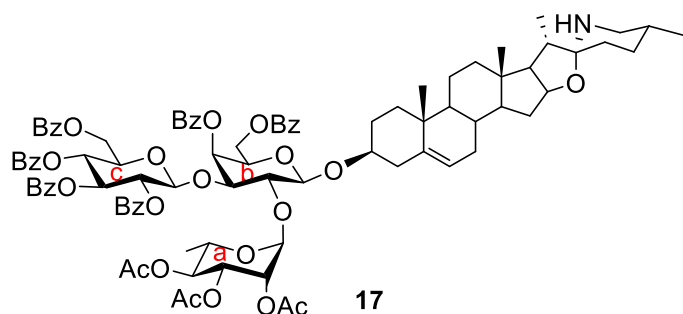

To a solution of **16** (110 mg, 66.3  $\mu$ mol) in anhydrous  $CH_3CN$  (3 mL) was added NaI (20 mg, 133  $\mu$ mol) was added. After the mixture was stirred for 30 min at rt, a solution of TMSCl (18  $\mu$ L, 142.5  $\mu$ mol) in anhydrous  $CH_3CN$  (150  $\mu$ L) was added dropwise. After the TLC analysis showed the reaction was complete (30min), the reaction was quenched with 10%  $Na_2S_2O_3$  solution, and 5% NaOH was added to adjust the pH value of the solution to 10. The mixture was stirred at rt for 1h. The solution was diluted with DCM and washed with brine, dried over  $Na_2SO_4$ , filtered, and concentrated. The residue was purified by column chromatography (petroleum ether/ethyl acetate/ $Et_3N$  = 1:2:0.03) on silica gel to afford compound **17** (90.4 mg, 84 %) as white foam.  $^1H$  NMR (400 MHz,  $CDCl_3$ )  $\delta$  8.08 – 7.94 (m, 6H, ArH), 7.90 (d,  $J$  = 7.8 Hz, 2H, ArH), 7.73 (d,  $J$  = 7.8 Hz, 2H, ArH), 7.61 (d,  $J$  = 7.7 Hz, 2H, ArH), 7.58 – 7.25 (m, 17H, ArH), 7.21 (t,  $J$  = 7.7 Hz, 2H, ArH), 5.96 (t,  $J$  = 9.6 Hz, 1H, 3c-H), 5.68 – 5.61 (m, 2H, 4c-H, 4b-H), 5.38 – 5.27 (m, 4H, 3a-H, 2a-H, 2c-H, 5b-H), 5.21 – 5.15 (m, 2H, 1a-H, 1c-H), 5.08 (t,  $J$  = 9.8 Hz, 1H, 4a-H), 4.61 (dd,  $J$  = 12.2, 4.8 Hz, 1H, 6c-H), 4.55 – 4.25 (m, 5H, 6c-H, 6b-H, 5a-H, 6b-H, 1b-H), 4.25 – 4.14 (m, 2H, 5c-H, 3b-H), 3.98 (t,  $J$  = 8.6 Hz, 1H, 2b-H), 3.86 (dd,  $J$  = 7.7, 5.3 Hz, 1H, 5b-H), 3.51 (tt,  $J$  = 10.8, 4.6 Hz, 1H), 2.71 – 2.56 (m, 2H), 2.44 – 2.37 (m, 1H), 2.27 (t,  $J$  = 12.2 Hz, 1H), 2.13 (s, 3H,  $COCH_3$ ), 2.06 (s,

3H, COCH<sub>3</sub>), 2.04 (s, 3H, COCH<sub>3</sub>), 2.02 – 1.94 (m, 2H), 1.89 (q, *J* = 7.2 Hz, 2H), 1.82 – 1.39 (m, 11H), 1.32 – 1.22 (m, 3H), 1.15 (d, *J* = 6.2 Hz, 3H, 6a-CH<sub>3</sub>), 0.96 (d, *J* = 6.7 Hz, 5H), 0.85 (d, *J* = 6.2 Hz, 3H), 0.81 (s, 3H). <sup>13</sup>C NMR (100 MHz, CDCl<sub>3</sub>) δ 170.2, 170.1, 169.9, 166.0, 165.9, 165.5, 165.1, 164.6, 140.3, 133.3, 133.0, 132.8, 130.1, 129.9, 129.8, 129.7, 129.6, 129.2, 129.0, 128.9, 128.38, 128.36, 128.3, 128.13, 128.07, 121.8, 100.1, 99.4, 98.3, 97.2, 79.7, 74.1, 72.6, 71.4, 71.2, 70.2, 69.9, 69.8, 69.0, 66.5, 62.8, 62.7, 60.4, 56.5, 50.1, 47.7, 41.3, 40.5, 39.9, 38.4, 37.0, 36.8, 34.1, 32.2, 31.4, 30.3, 29.7, 20.9, 20.8, 19.3, 19.2, 17.3, 16.4, 15.3, 14.2. HRMS (ESI) Calcd for C<sub>93</sub>H<sub>104</sub>NO<sub>25</sub><sup>+</sup> [M+H]<sup>+</sup>: 1635.6926, found: 1635.6963.

### Solasonine 1

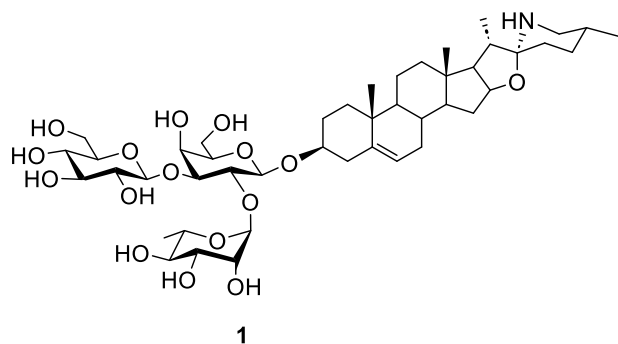

To a solution of **17** (130mg, 79.5 μmol) in a mixed solvent of DCM/MeOH (4.5 mL, v/v = 1:4) was added 1M NaOH to adjust the pH value of the solution to 12. The mixture was stirred for 4 h at 70 °C. After the TLC analysis showed the reaction was complete. The mixture was concentrated and the residue was purified by column chromatography (DCM/MeOH containing 8% H<sub>2</sub>O/Et<sub>3</sub>N = 3:1:0.01) on silica gel to afford compound **1** (64 mg, 91 %) as white solid<sup>1,2</sup>. <sup>1</sup>H NMR (400 MHz, Pyridine-*d*<sub>5</sub>) δ 6.25 (d, *J* = 1.4 Hz, 1H), 5.28 (d, *J* = 5.0 Hz, 1H), 5.15 (d, *J* = 7.7 Hz, 1H), 4.89 (d, *J* = 7.8 Hz, 2H), 4.86 (dd, *J* = 3.2, 1.7 Hz, 1H), 4.77 (d, *J* = 3.1 Hz, 1H), 4.66 (dd, *J* = 9.6, 7.8 Hz, 1H), 4.56 (dd, *J* = 9.3, 3.4 Hz, 1H), 4.45 – 4.37 (m, 2H), 4.34 (dd, *J* = 11.2, 6.5 Hz, 1H), 4.30 – 4.23 (m, 3H), 4.20 (dd, *J* = 11.3, 5.1 Hz, 1H), 4.17 – 4.10 (m, 2H), 3.97 (t, *J* = 6.1 Hz, 1H), 3.90 (q, *J* = 7.3, 5.8 Hz, 3H), 2.80 – 2.66 (m, 4H), 2.12 – 1.97 (m, 2H), 1.92 (q, *J* = 9.2, 8.1 Hz, 1H), 1.88 – 1.78 (m, 1H), 1.78 – 1.13 (m, 17H), 1.11 – 0.97 (m, 8H), 0.96 – 0.80 (m, 6H), 0.77 (d, *J* = 4.5 Hz, 3H). <sup>13</sup>C NMR (150 MHz, Pyridine-*d*<sub>5</sub>) δ 140.8,

121.6, 105.8, 102.2, 100.3, 98.3, 84.7, 79.2, 78.4, 78.3, 77.4, 76.4, 75.0, 74.9, 74.1, 72.8, 72.5, 71.5, 70.4, 69.4, 63.3, 62.52, 62.47, 56.5, 50.2, 47.7, 41.6, 40.6, 39.9, 38.7, 37.4, 37.1, 34.4, 32.5, 32.2, 31.6, 31.2, 30.7, 30.0, 21.0, 19.5, 19.3, 18.5, 16.4, 15.6.

**Diosgenyl 2-O-(2,3,4-tri-O-acetyl- $\alpha$ -L-rhamnopyranosyl)-3-O-(2,3,4,6-tetra-O-benzoyl- $\beta$ -D-glucopyranosyl)-4,6-di-O-benzoyl- $\beta$ -D-galactopyranoside (15)**

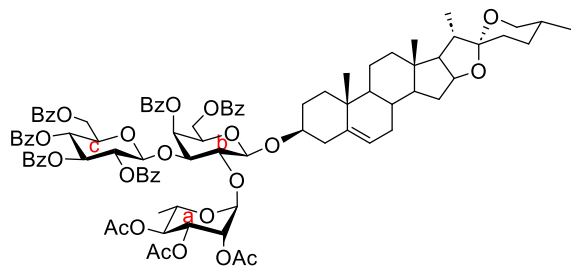

15

To a solution of donor **4** (50 mg, 36.2  $\mu$ mol) and 4 Å molecular sieves in solvent of DCM/*t*BuCN (3.6 mL, v/v =5:1, 0.01 M) was added acceptor **5** (19 mg, 43.4  $\mu$ mol) at room temperature. After the reaction mixture cooling down to  $-50$  °C, gold(III) chloride (1.1 mg, 3.62 $\mu$ mol) was added into the reaction. After the TLC analysis showed the reaction was complete (10 min), the reaction was quenched by addition of triethylamine and diluted with 50 mL of DCM. Then the precipitate was filtered off through a pad of Celite. The residue was purified by column chromatography (petroleum ether/ethyl acetate = 3:1) on silica gel to afford compound **15** (49.6 mg, 84%) as semisolid.  $^1\text{H}$  NMR (400 MHz,  $\text{CDCl}_3$ )  $\delta$  8.04 – 7.95 (m, 6H, ArH), 7.90 (d,  $J$  = 7.9 Hz, 2H, ArH), 7.73 (d,  $J$  = 7.7 Hz, 2H, ArH), 7.61 (d,  $J$  = 7.7 Hz, 2H, ArH), 7.56 – 7.18 (m, 15H, ArH), 5.96 (t,  $J$  = 9.6 Hz, 1H, 3c-H), 5.70 – 5.62 (m, 2H, 4c-H, 4b-H), 5.40 – 5.27 (m, 5H, 2c-H, 2a-H, 3a-H), 5.22 – 5.15 (m, 2H, 1c-H, 1a-H), 5.08 (t,  $J$  = 9.7 Hz, 1H, 4a-H), 4.61 (dd,  $J$  = 12.2, 4.8 Hz, 1H, 6c-H), 4.54 – 4.30 (m, 6H, 6c'-H, 5a-H, 1b-H, 5b-H, 6b-H, 6b'-H), 4.25 – 4.09 (m, 2H, 5c-H), 3.98 (t,  $J$  = 8.6 Hz, 1H, 3b-H), 3.86 (dd,  $J$  = 7.8, 5.2 Hz, 1H, 2b-H), 3.50 (ddd,  $J$  = 15.6, 10.8, 5.5 Hz, 2H), 3.38 (t,  $J$  = 10.9 Hz, 1H), 2.46 – 2.38 (m, 1H), 2.32 – 2.23 (m, 1H), 2.13 (s, 3H,  $\text{COCH}_3$ ), 2.05 (d,  $J$  = 5.8 Hz, 6H,  $\text{COCH}_3$ ), 2.03 – 1.93 (m, 1H), 1.92 – 1.70 (m, 4H), 1.69 – 1.60 (m, 6H), 1.55 – 1.36 (m, 3H), 1.35 – 1.22 (m, 4H), 1.15 (d,  $J$  = 6.2 Hz, 3H, 6a- $\text{CH}_3$ ), 1.00 – 0.95 (m, 6H), 0.94 – 0.83 (m, 2H), 0.79 (d,  $J$  = 6.4 Hz, 6H).  $^{13}\text{C}$  NMR (150 MHz,  $\text{CDCl}_3$ )  $\delta$  169.2,

169.1, 169.0, 165.00, 164.98, 164.9, 164.5, 164.1, 163.6, 139.3, 132.3, 132.02, 132.00, 131.97, 131.9, 131.8, 129.1, 128.9, 128.8, 128.74, 128.69, 128.65, 128.63, 128.56, 128.1, 127.93, 127.87, 127.4, 127.3, 127.13, 127.08, 120.8, 108.3, 99.0, 98.3, 96.2, 79.8, 78.8, 76.5, 73.0, 71.5, 70.4, 70.1, 69.1, 68.9, 68.7, 68.0, 65.8, 65.5, 61.6, 61.1, 55.5, 49.0, 40.6, 39.2, 38.7, 37.4, 35.9, 35.8, 35.6, 31.1, 30.9, 30.8, 30.4, 29.3, 28.7, 28.6, 27.8, 19.9, 19.81, 19.78, 18.2, 16.3, 16.1, 15.3, 13.5. HRMS (ESI) Calcd for  $C_{93}H_{103}O_{26}^+$   $[M+H]^+$ : 1636.6766, found: 1636.6751;  $C_{93}H_{102}NaO_{26}^+$   $[M+Na]^+$ : 1658.6586, found: 1636.6586;  $C_{93}H_{106}NO_{26}^+$   $[M+NH_4]^+$ : 1653.7032, found: 1653.7023.

## Saponin 2

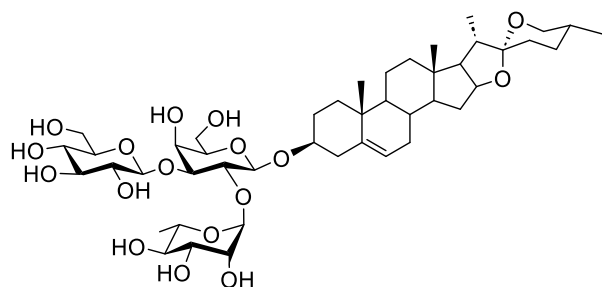

2

To a solution of **15** (55.4mg, 33.9  $\mu$  mol) in a mixed solvent of DCM/MeOH (1.8 mL, v/v = 1:2) was added 1M NaOH to adjust the pH value of the solution to 9-10. The mixture was stirred for 6h at rt. After the TLC analysis showed the reaction was complete. The mixture was concentrated and the residue was purified by column chromatography (DCM/MeOH = 2:1) on silica gel to afford compound **2** (24.9 mg, 83%) as white solid<sup>3,5</sup>.  $^1H$  NMR (400 MHz, Pyridine- $d_5$ )  $\delta$  6.27 (s, 1H), 5.32 (d,  $J = 5.1$  Hz, 1H), 5.20 (d,  $J = 7.7$  Hz, 1H), 5.05 – 4.77 (m, 4H), 4.72 – 4.52 (m, 3H), 4.47 (dd,  $J = 11.7, 2.4$  Hz, 1H), 4.32 (tdd,  $J = 16.6, 11.1, 5.1$  Hz, 6H), 4.20 (t,  $J = 9.1$  Hz, 1H), 4.08 – 3.85 (m, 5H), 3.63 – 3.55 (m, 1H), 3.51 (t,  $J = 10.0$  Hz, 1H), 2.84 – 2.57 (m, 3H), 2.08 (ddd,  $J = 25.4, 11.7, 6.4$  Hz, 2H), 2.00 – 1.77 (m, 3H), 1.76 – 1.36 (m, 12H), 1.26 (q,  $J = 7.7, 7.3$  Hz, 2H), 1.19 – 1.00 (m, 6H), 0.99 – 0.78 (m, 5H), 0.71 (d,  $J = 5.1$  Hz, 4H).  $^{13}C$  NMR (100 MHz, Pyridine- $d_5$ )  $\delta$  140.7, 121.6, 109.1, 105.7, 101.9, 100.2, 84.7, 81.0, 78.24, 78.20, 77.4, 76.3, 75.1, 74.8, 73.8, 72.7, 72.4, 71.4, 70.2, 69.2, 66.7,

62.7, 62.4, 62.3, 56.5, 50.1, 41.8, 40.3, 39.7, 38.6, 37.3, 37.0, 32.1, 31.5, 30.4, 30.0,  
29.8, 29.1, 20.9, 19.2, 18.4, 17.2, 16.2, 14.9.

## 6. References

1. A. Usubillaga, I. Aziz, M. C. Tettamanzi, R. Waibel and H. Achenbach, *Phytochemistry*, 1997, **44**, 537-543.
2. K. Fukuhara and I. Kubo, *Phytochemistry*, 1991, **30**, 685-687.
3. S. Yahara, T. Nakamura, Y. Someya, T. Matsumoto, T. Yamashita and T. Nohara, *Phytochemistry*, 1996, **43**, 1319-1323.
4. S. Bhaduri and N. L. Pohl, *Org. Lett.*, 2016, **18**, 1414-1417.
5. G. Gu, Y. Du and R. J. Linhardt, *J. Org. Chem.*, 2004, **69**, 5497-5500.

## 7. Copies of NMR Spectra

$^1\text{H}$  spectrum of compound **10** (400 MHz,  $\text{CDCl}_3$ )

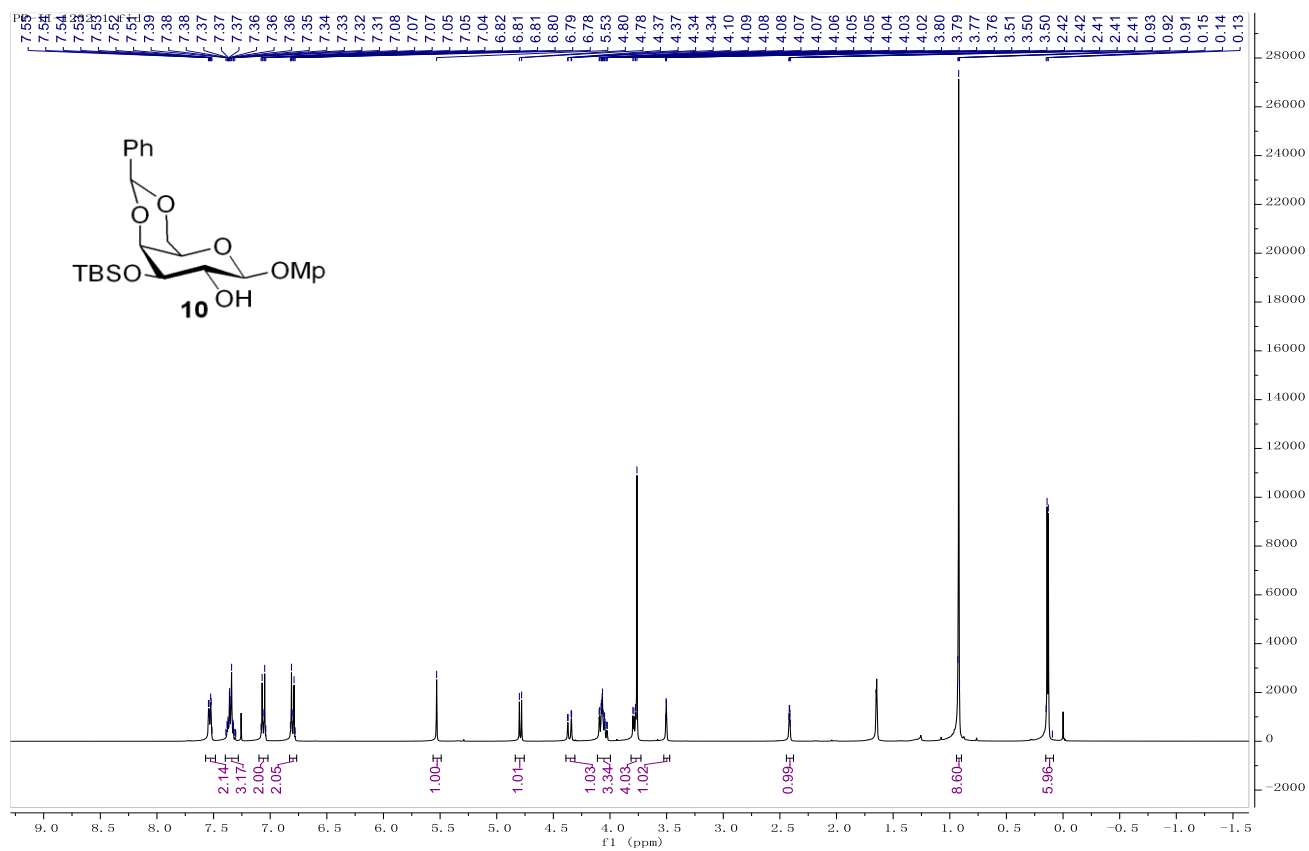



$^1\text{H}$  spectrum of compound **11** (400 MHz,  $\text{CDCl}_3$ )

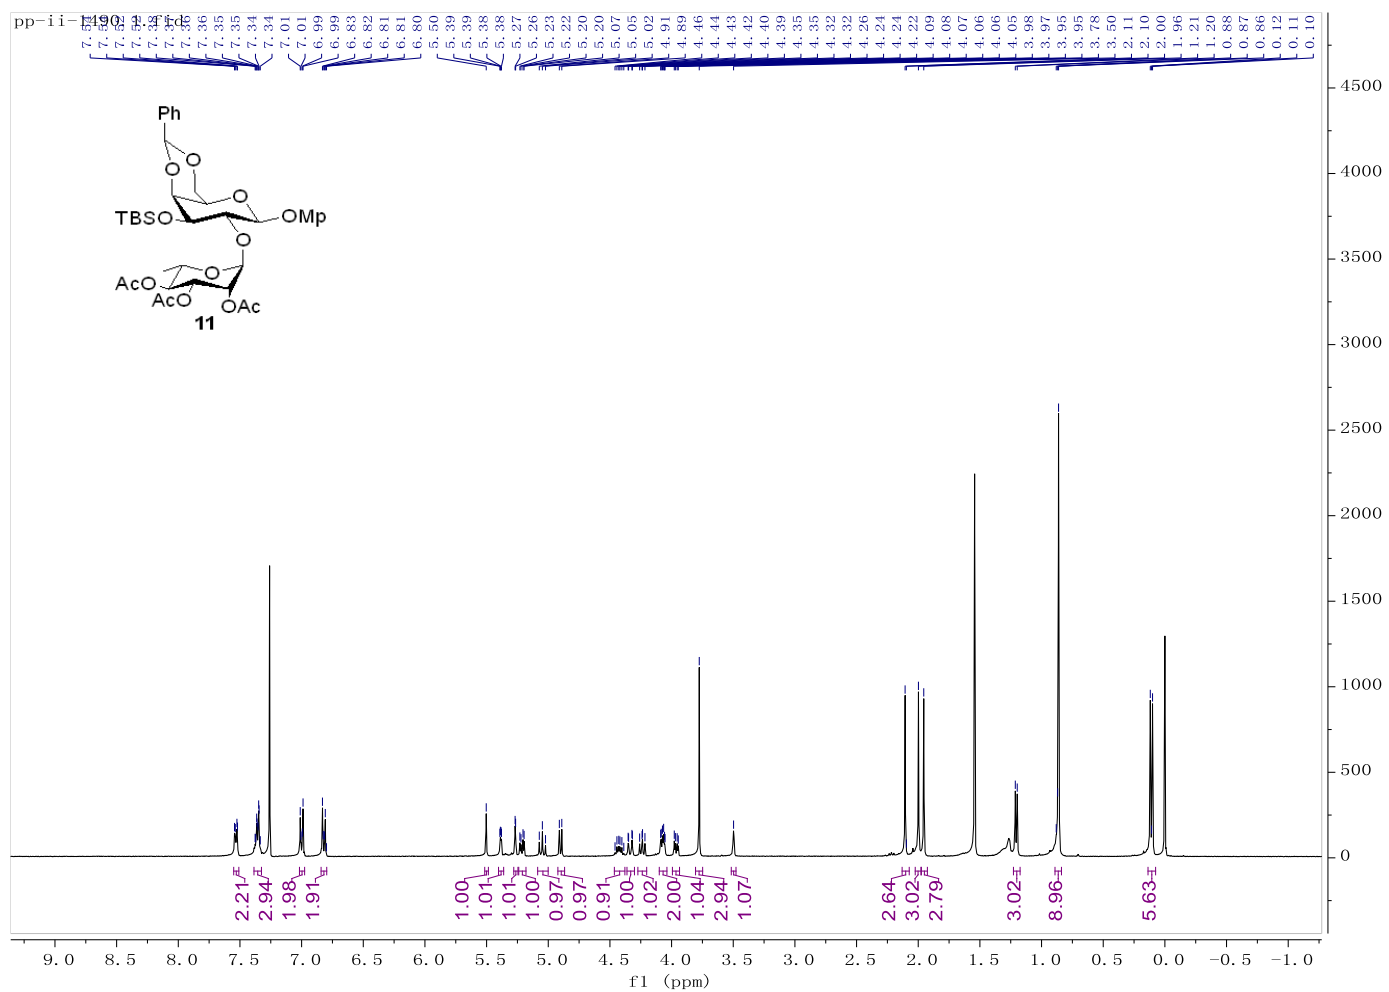

$^1\text{H}$ - $^1\text{H}$  COSY of compound **11**

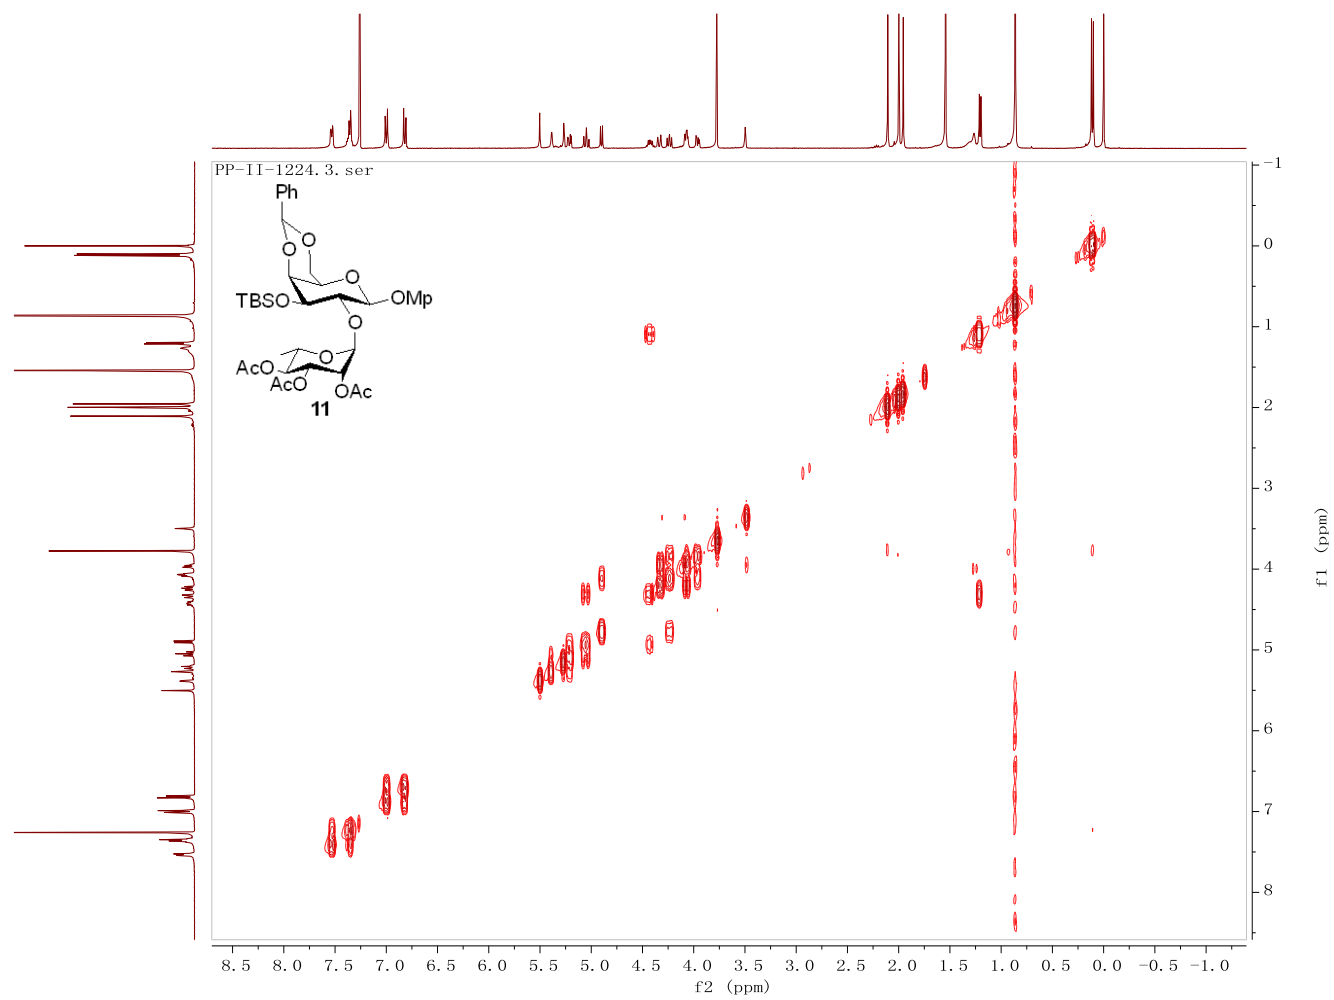

# HSQC of compound 11

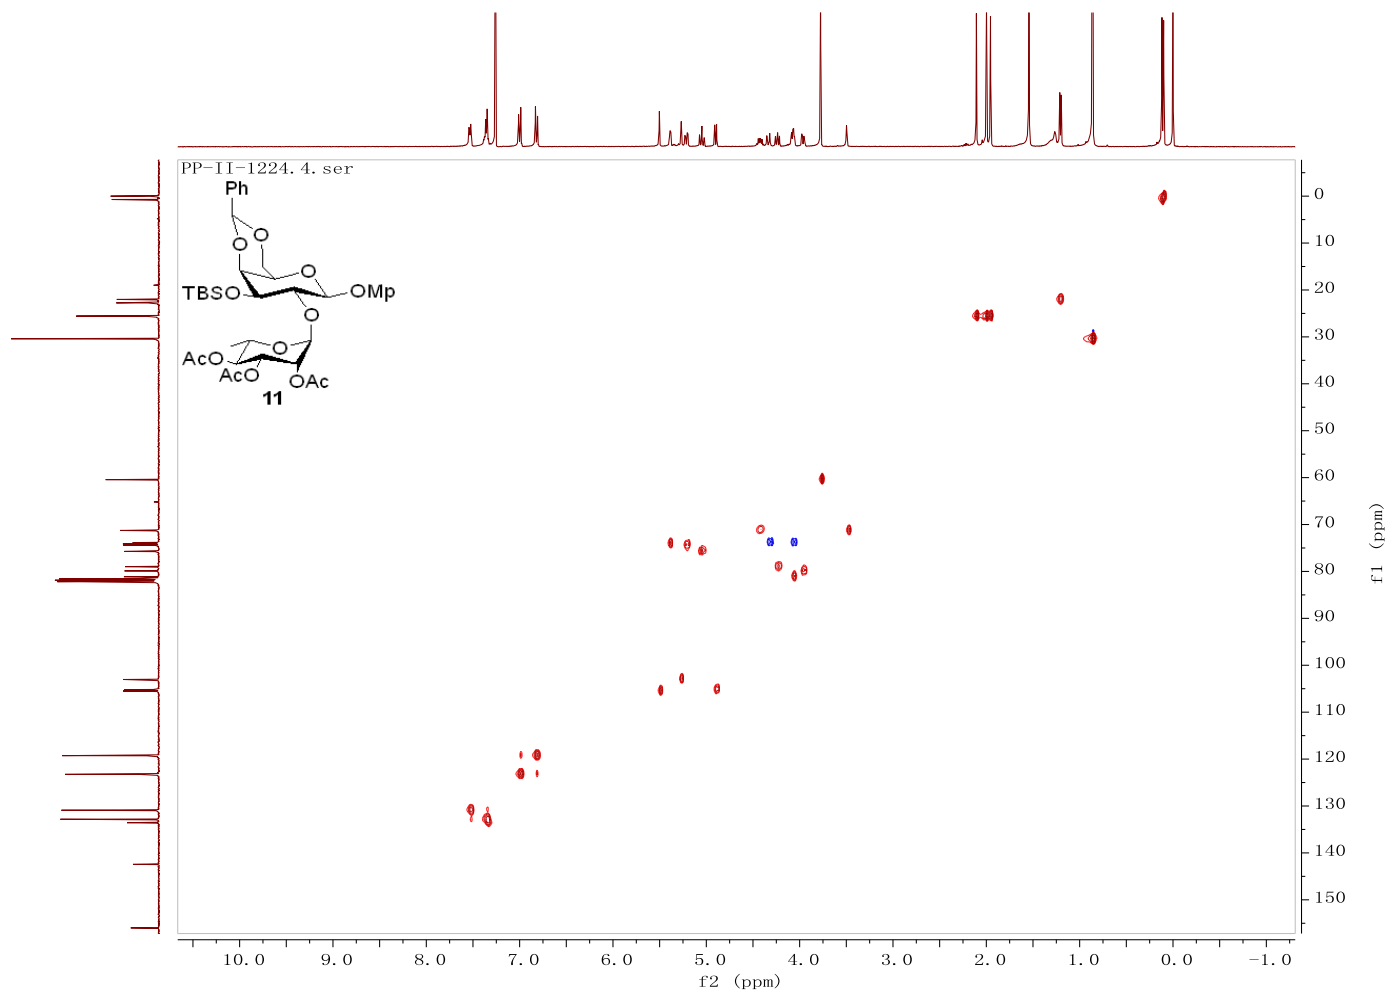

$^{13}\text{C}$  spectrum of compound **11** (100 MHz,  $\text{CDCl}_3$ )

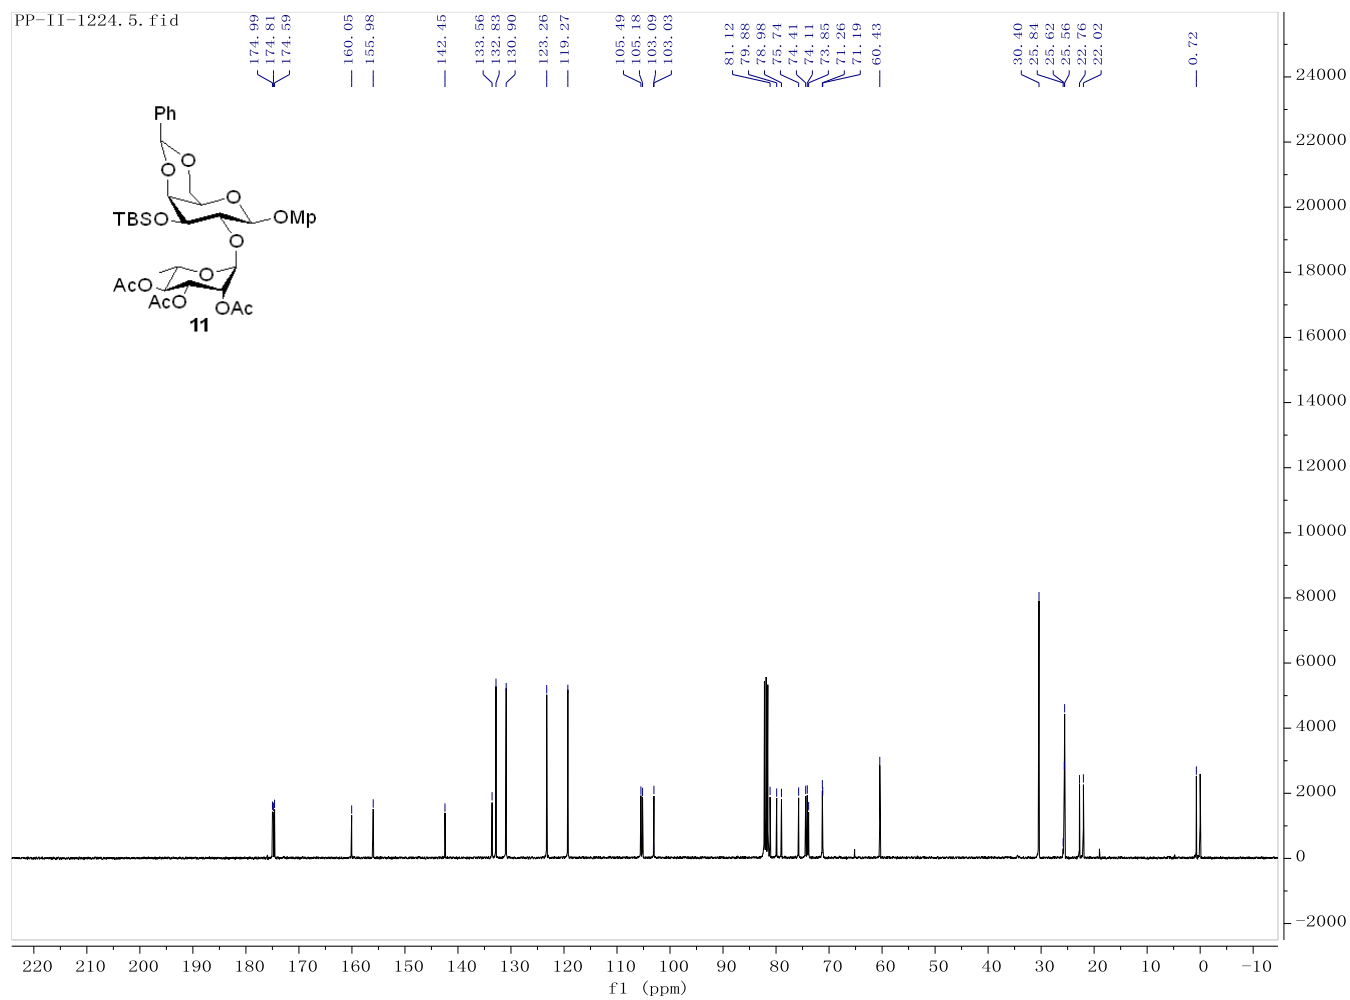

<sup>1</sup>H spectrum of compound **12** (400 MHz, CDCl<sub>3</sub>)

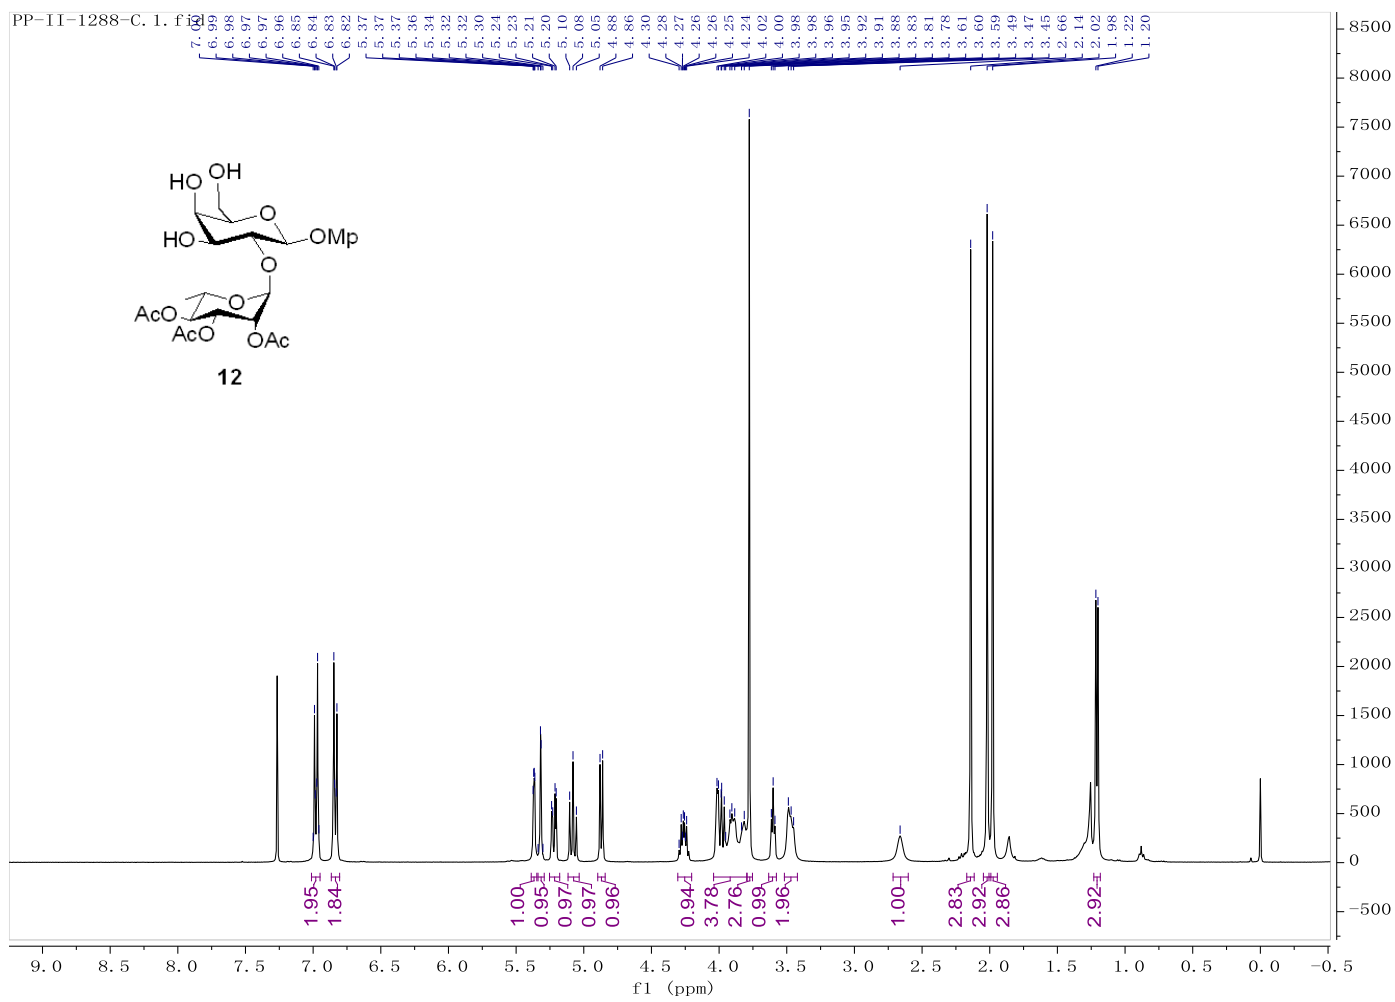

$^1\text{H}$ - $^1\text{H}$  COSY of compound **12**

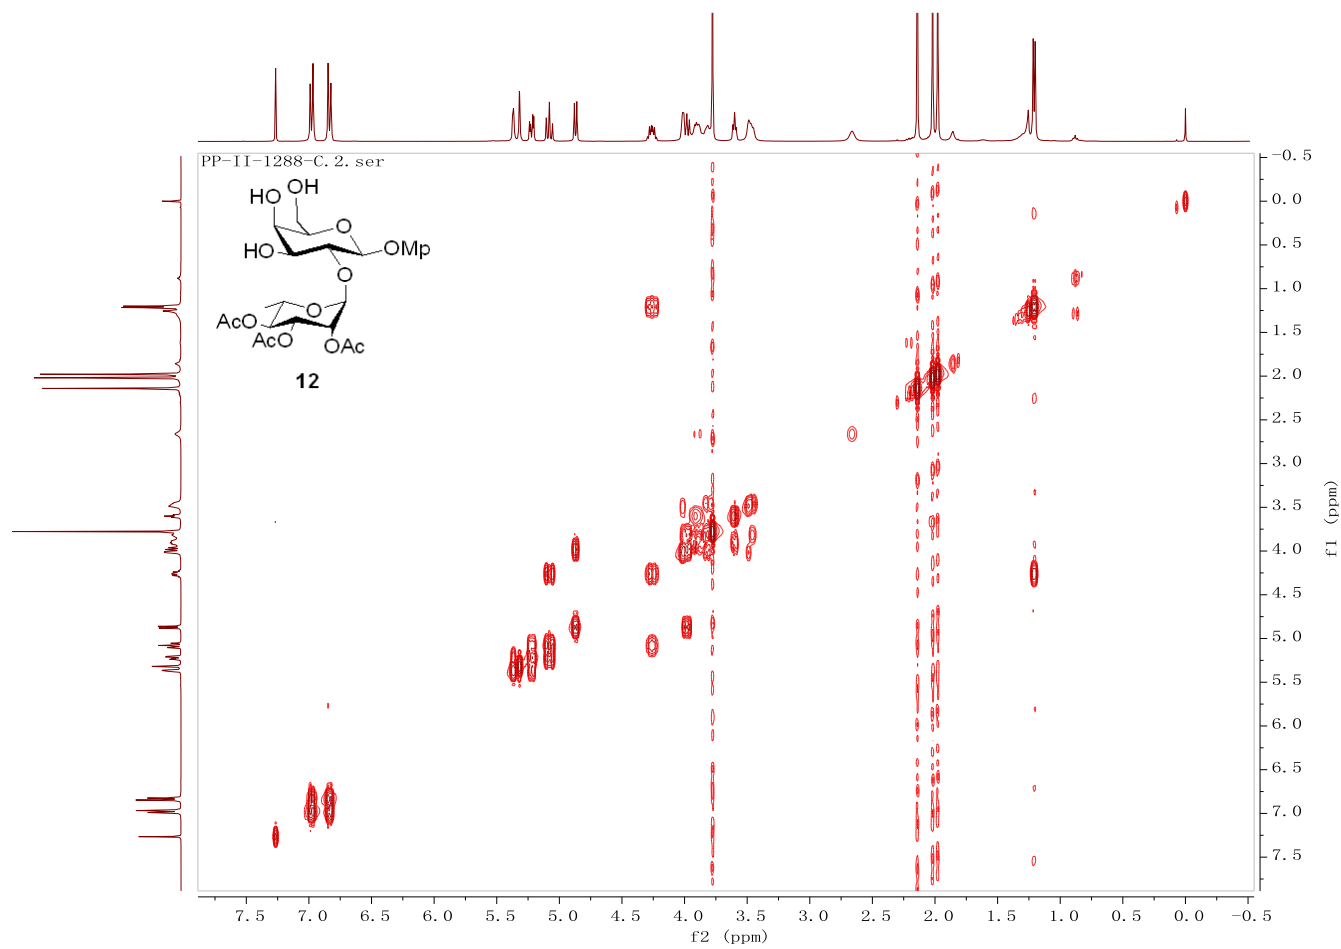

# HSQC of compound 12

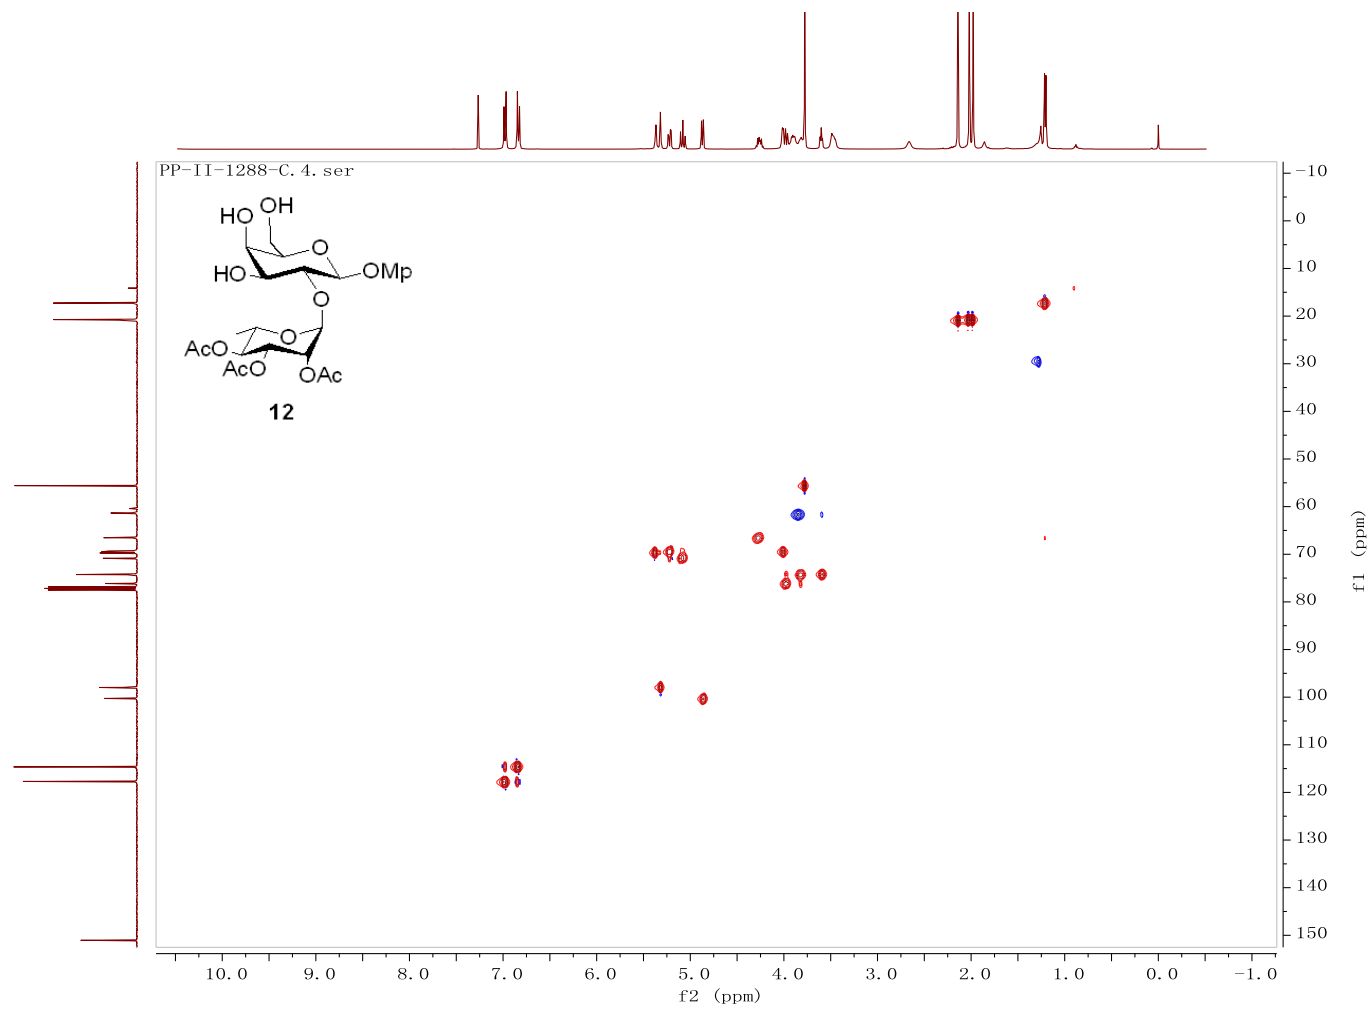

<sup>13</sup>C spectrum of compound **12** (100 MHz, CDCl<sub>3</sub>)

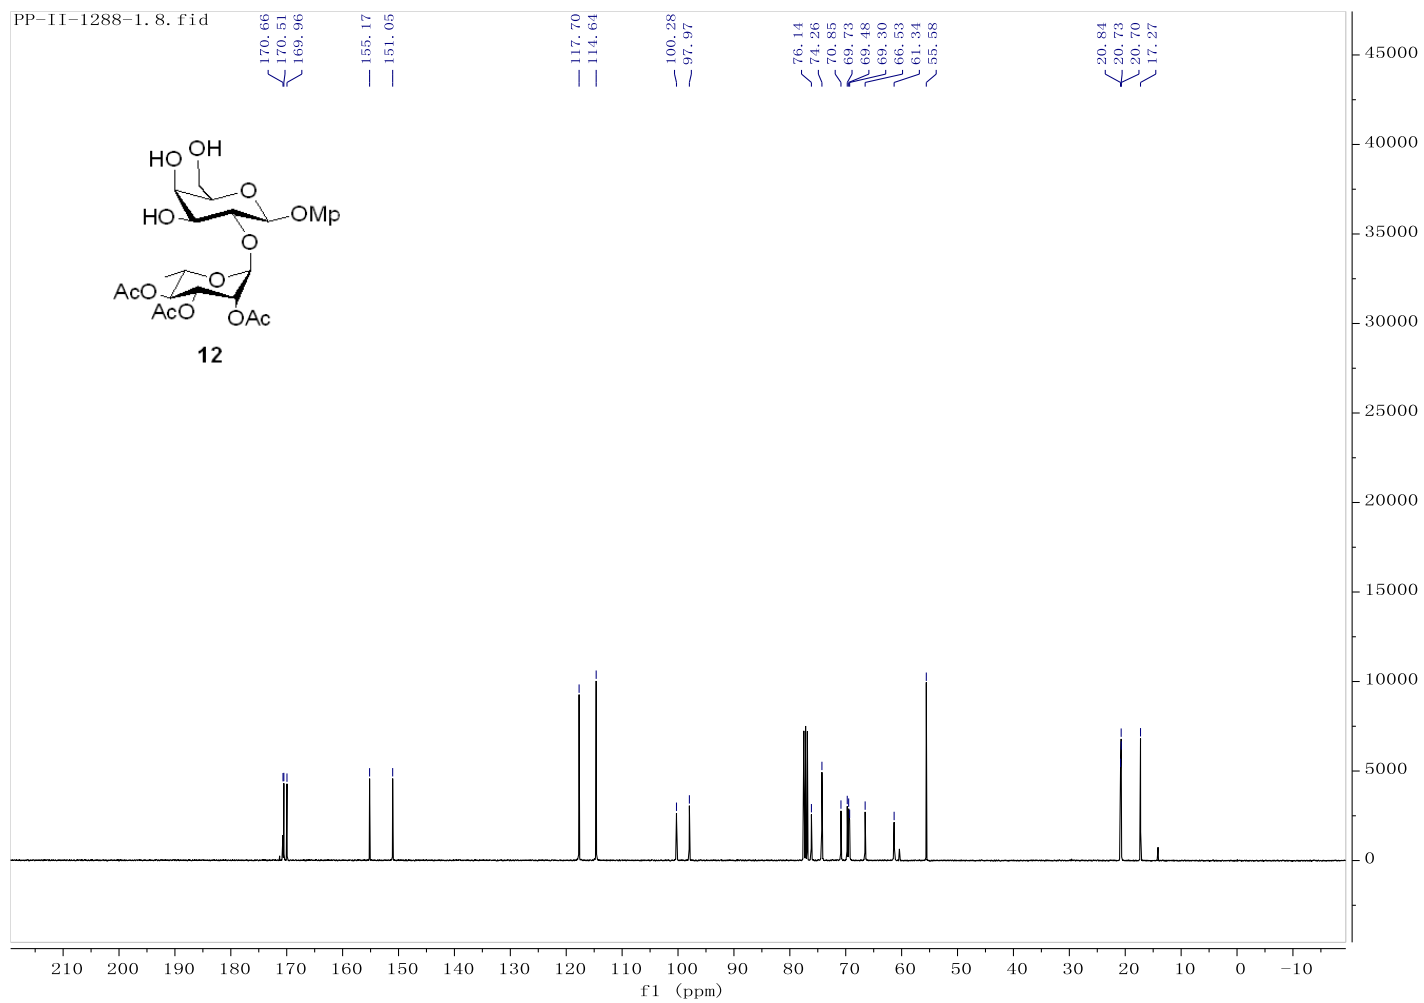



<sup>1</sup>H spectrum of compound 7 (400 MHz, CDCl<sub>3</sub>)

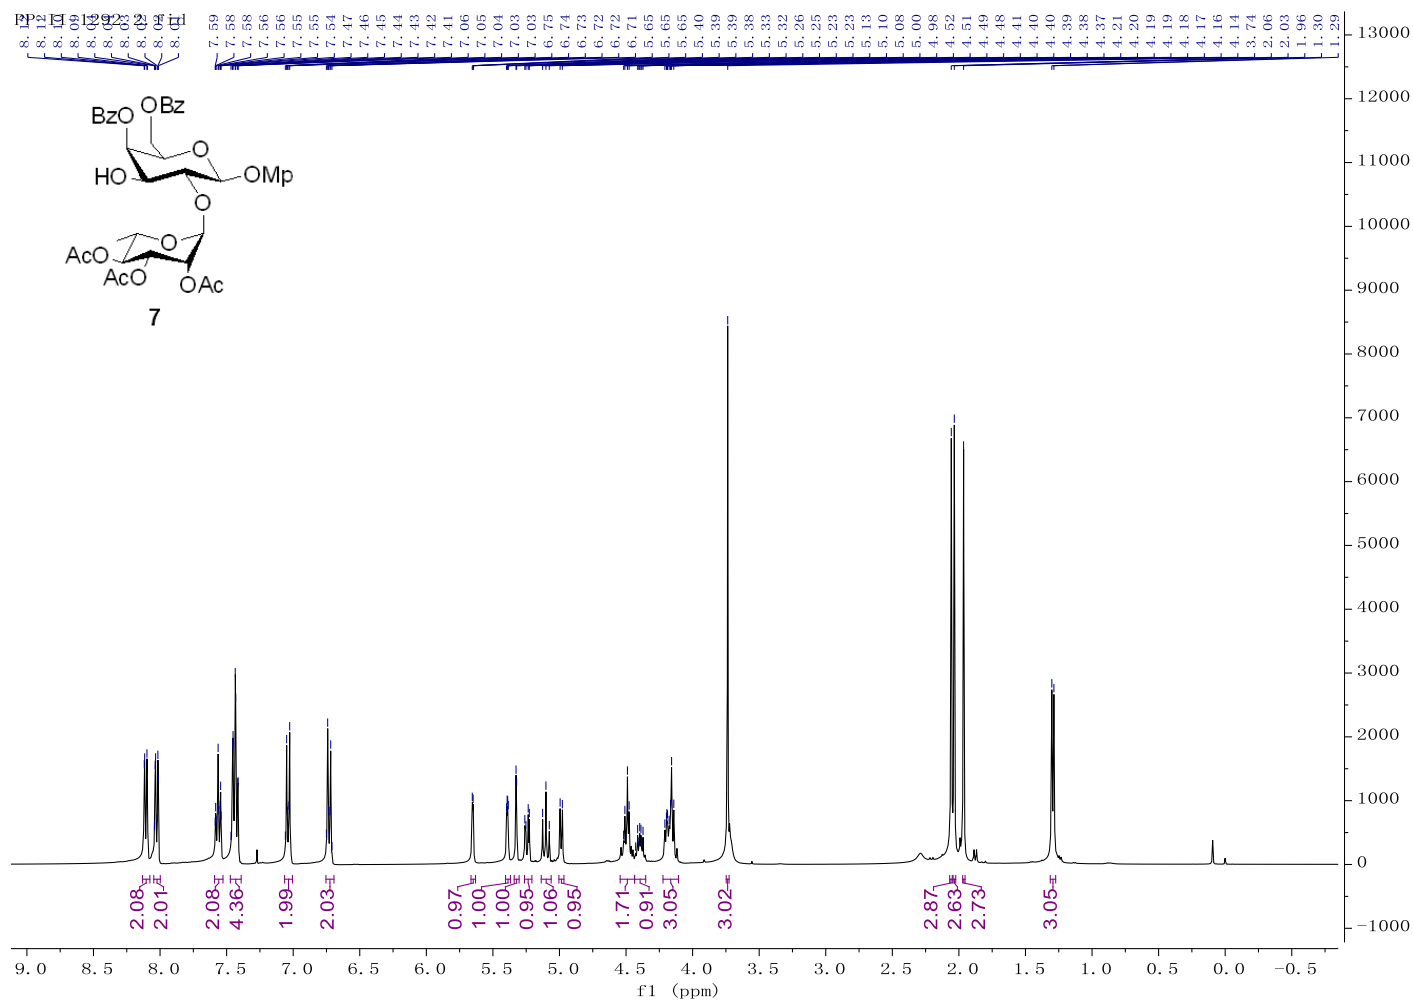

$^1\text{H}$ - $^1\text{H}$  COSY of compound 7

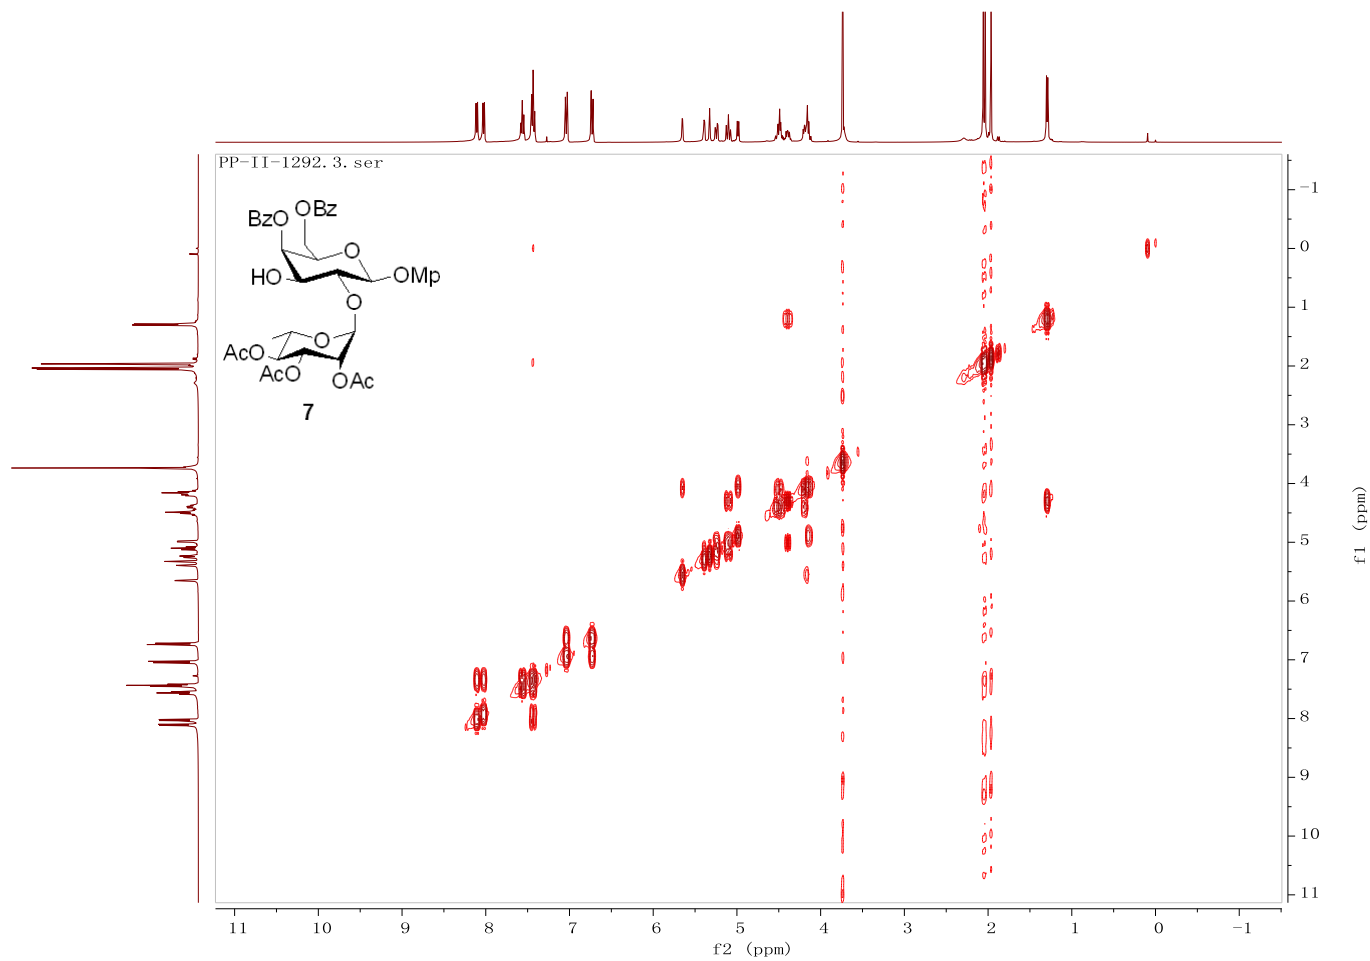

# HSQC of compound 7

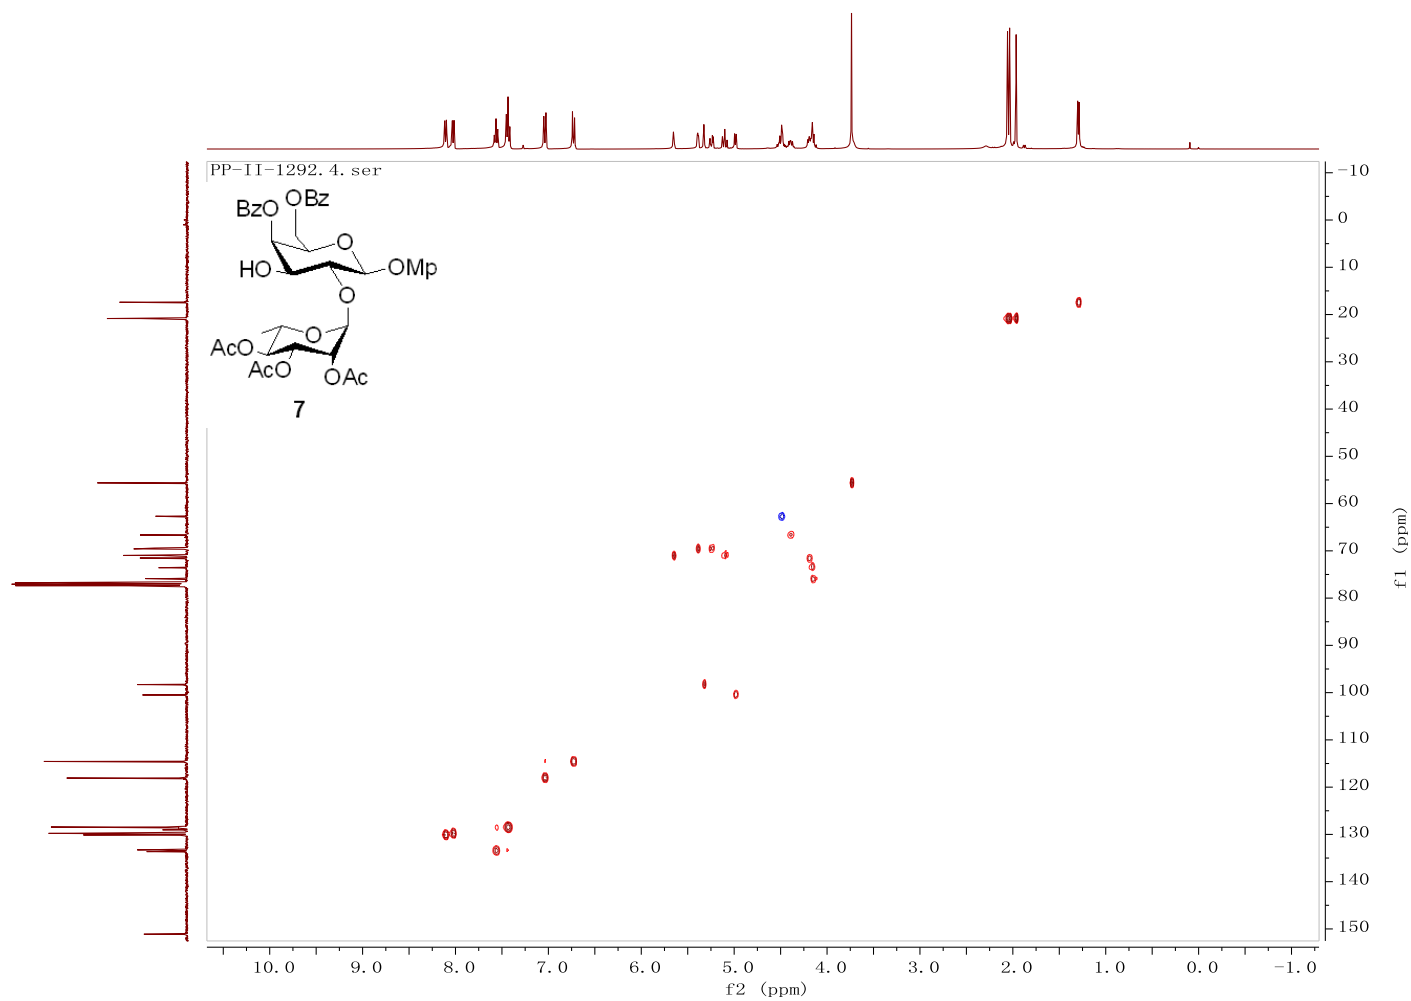

<sup>13</sup>C spectrum of compound 7 (100 MHz, CDCl<sub>3</sub>)

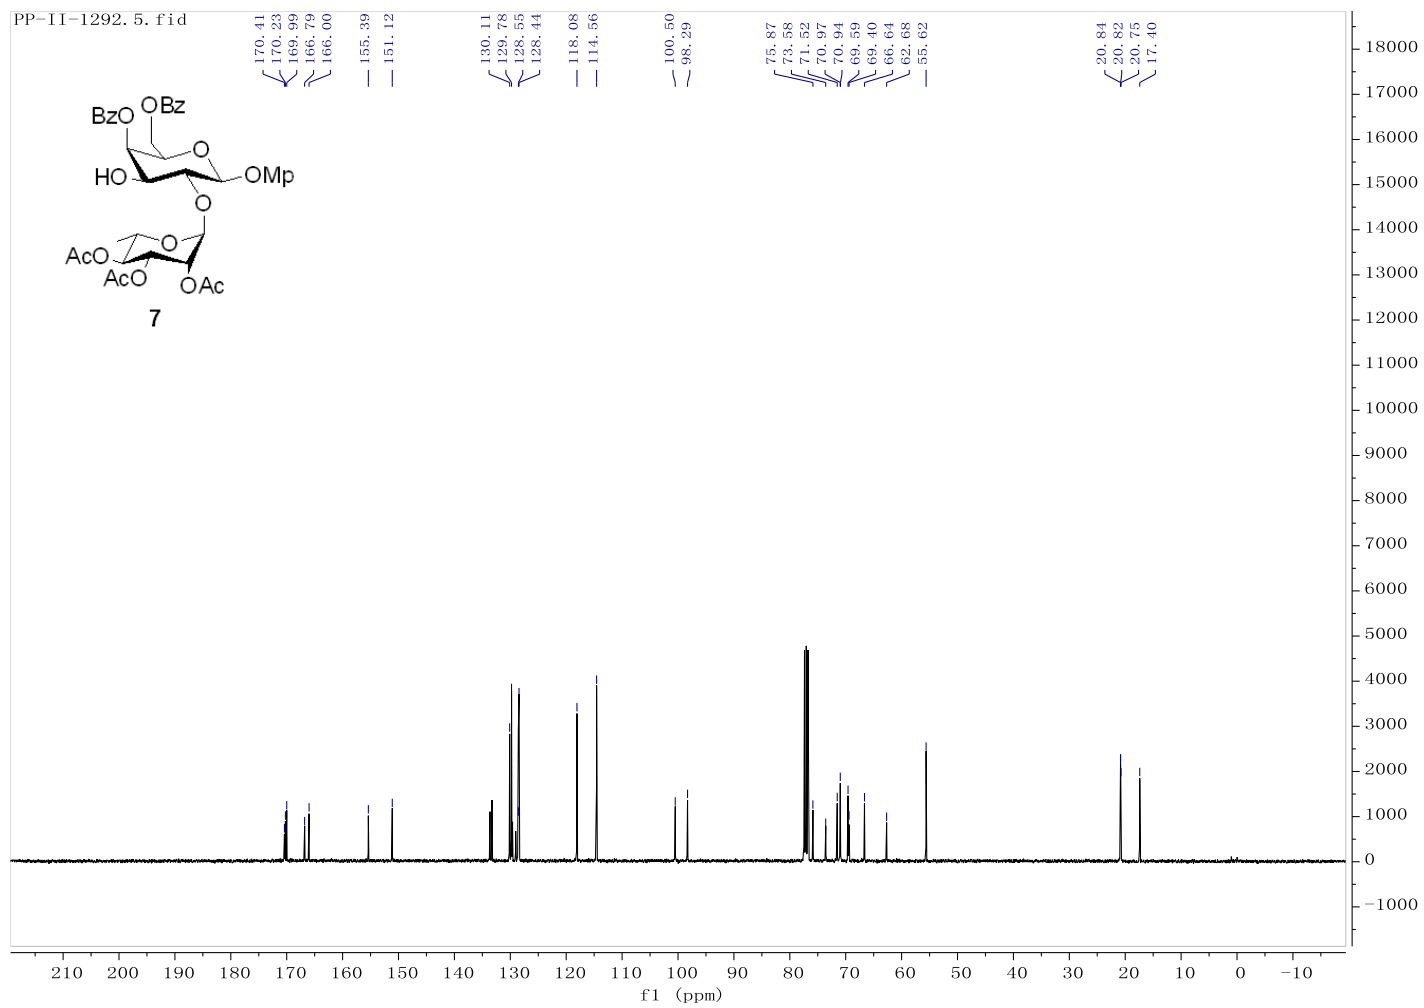

<sup>1</sup>H spectrum of compound **13β** (400 MHz, CDCl<sub>3</sub>)

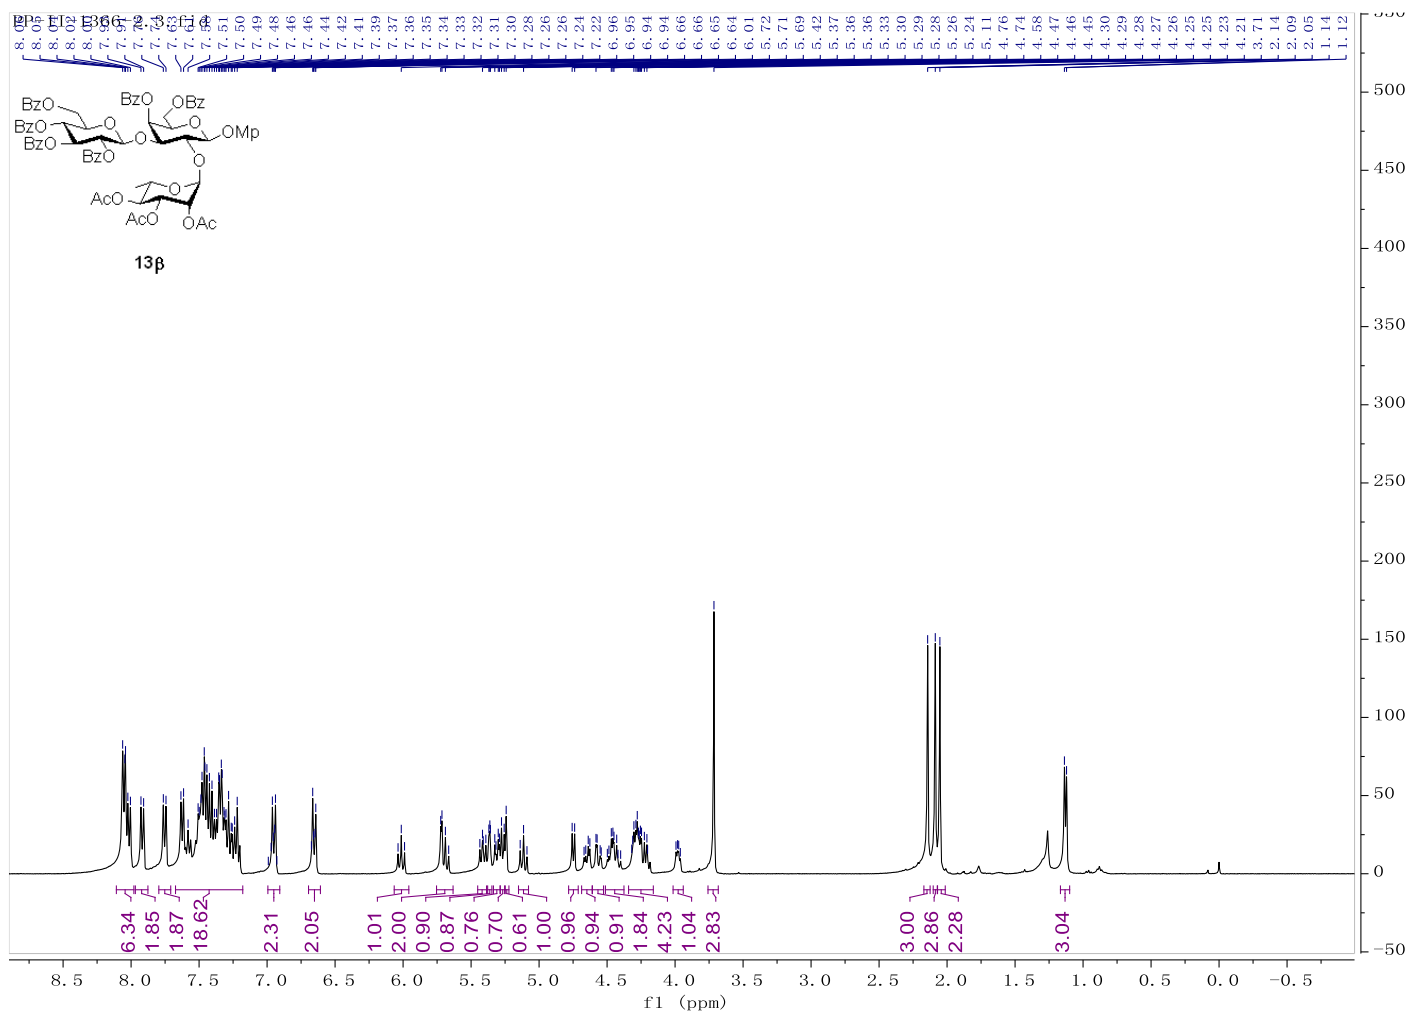

$^1\text{H}$ - $^1\text{H}$  COSY of compound **13 $\beta$**

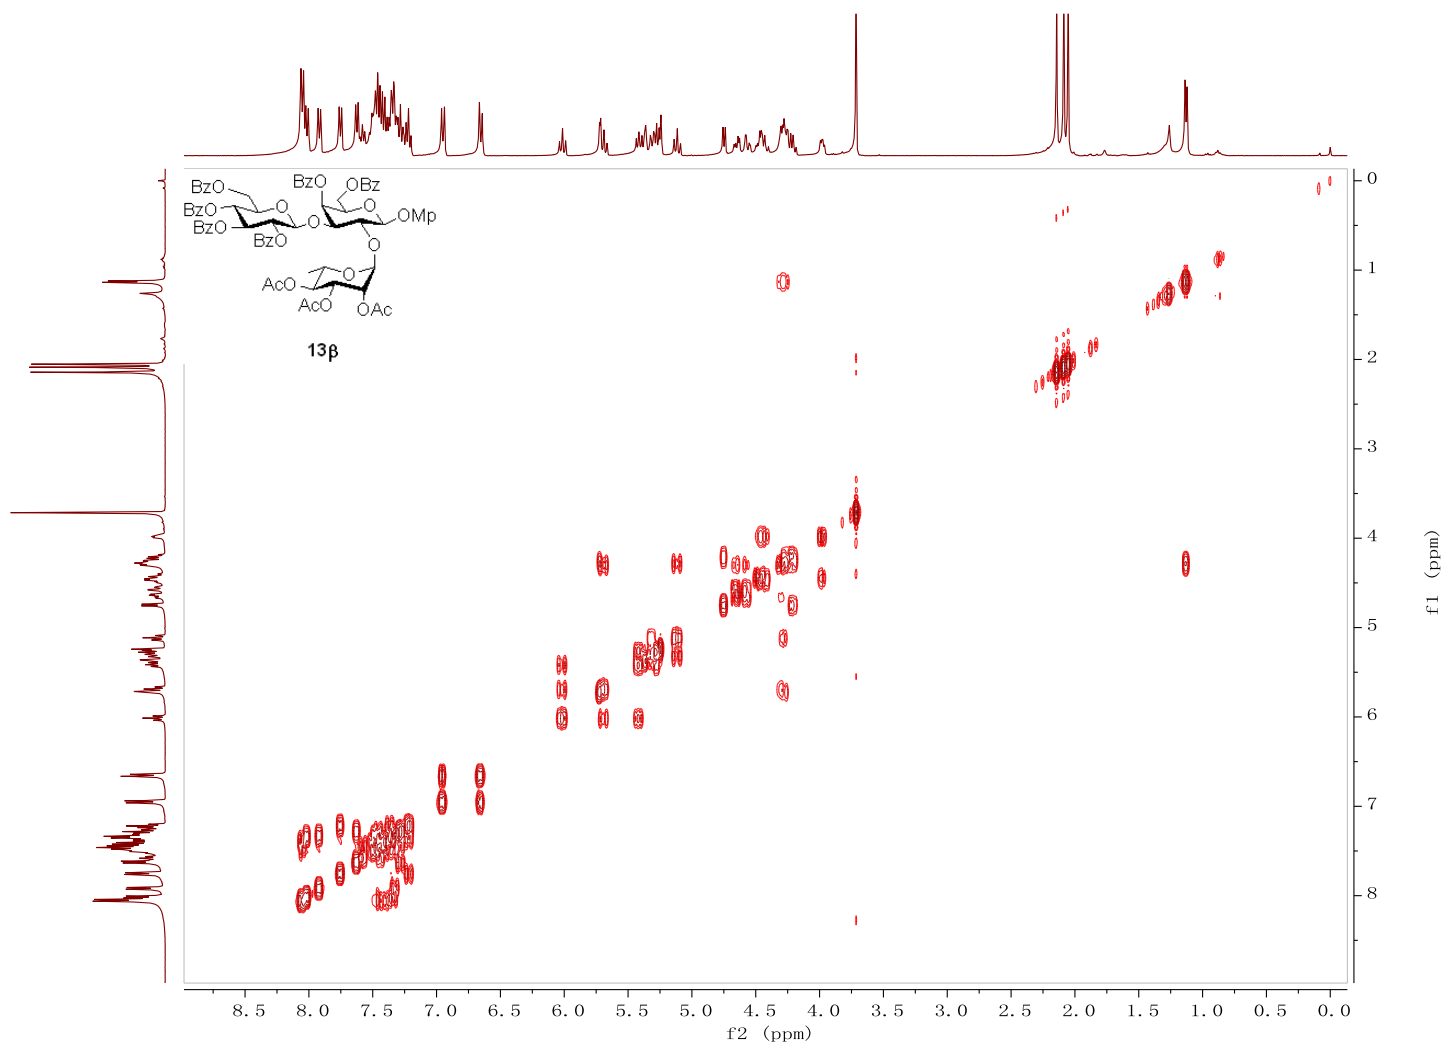

### HSQC of compound **13 $\beta$**

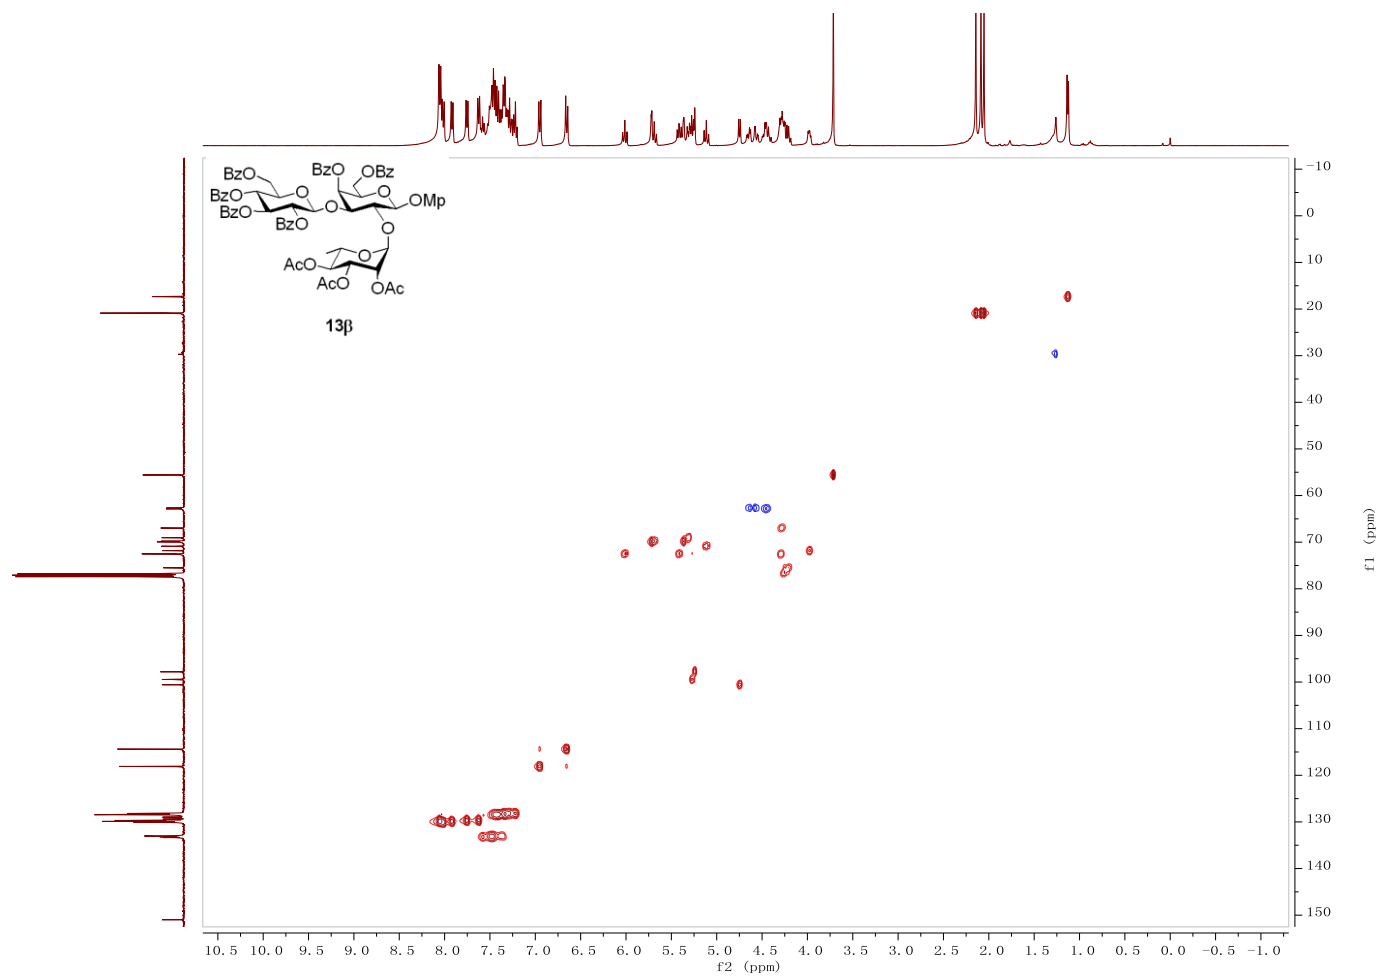

<sup>13</sup>C spectrum of compound **13β** (100 MHz, CDCl<sub>3</sub>)

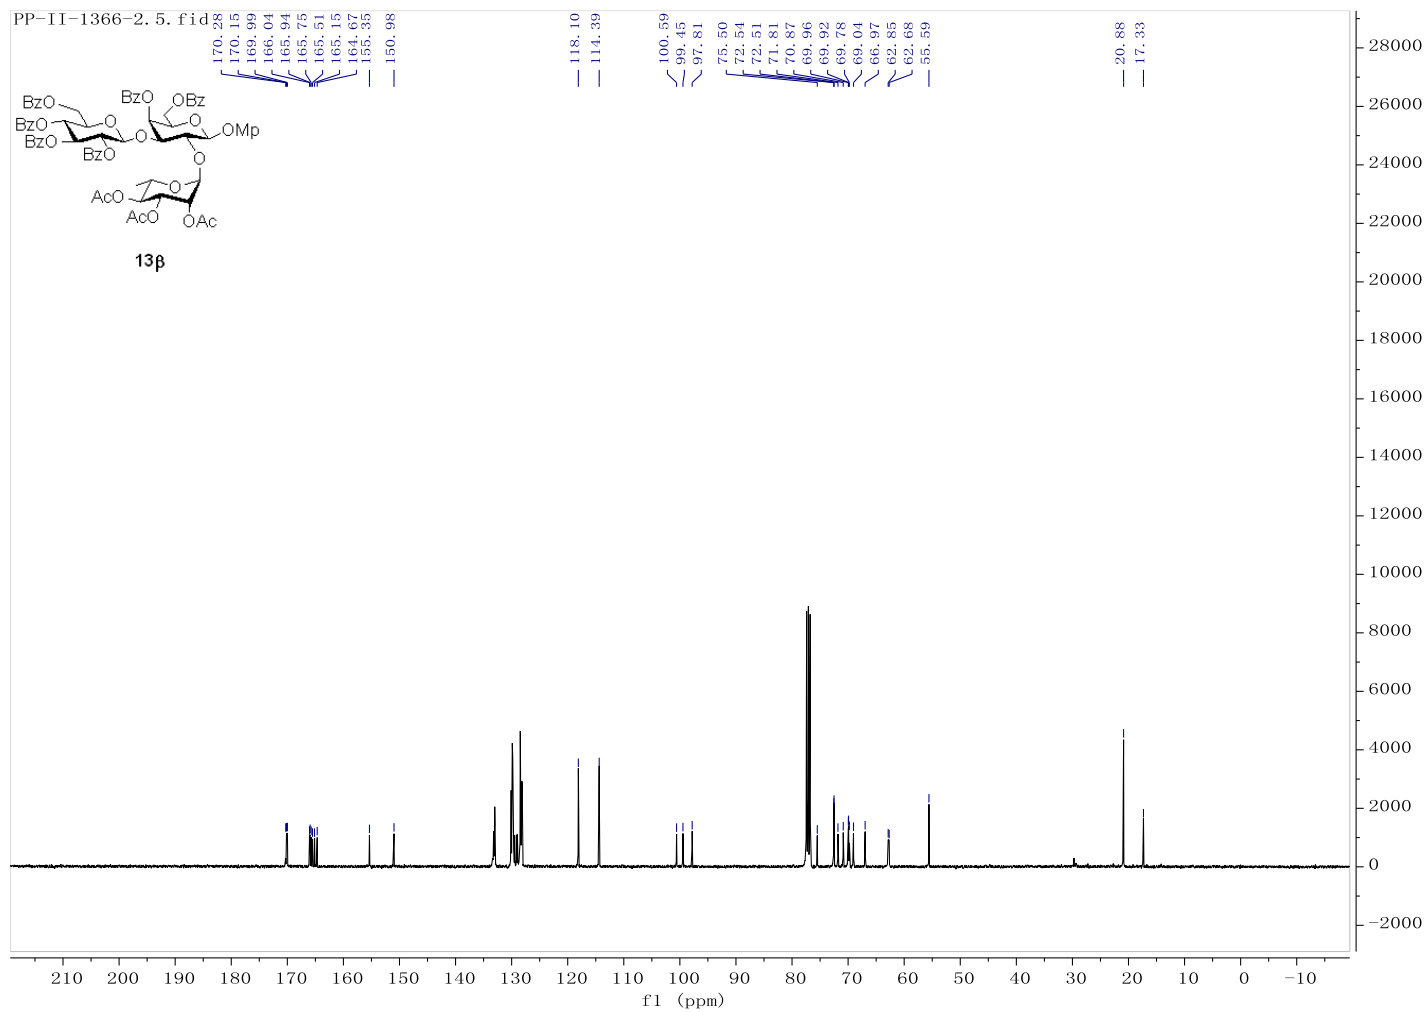



<sup>1</sup>H spectrum of compound **13 $\alpha$**  (400 MHz, CDCl<sub>3</sub>)

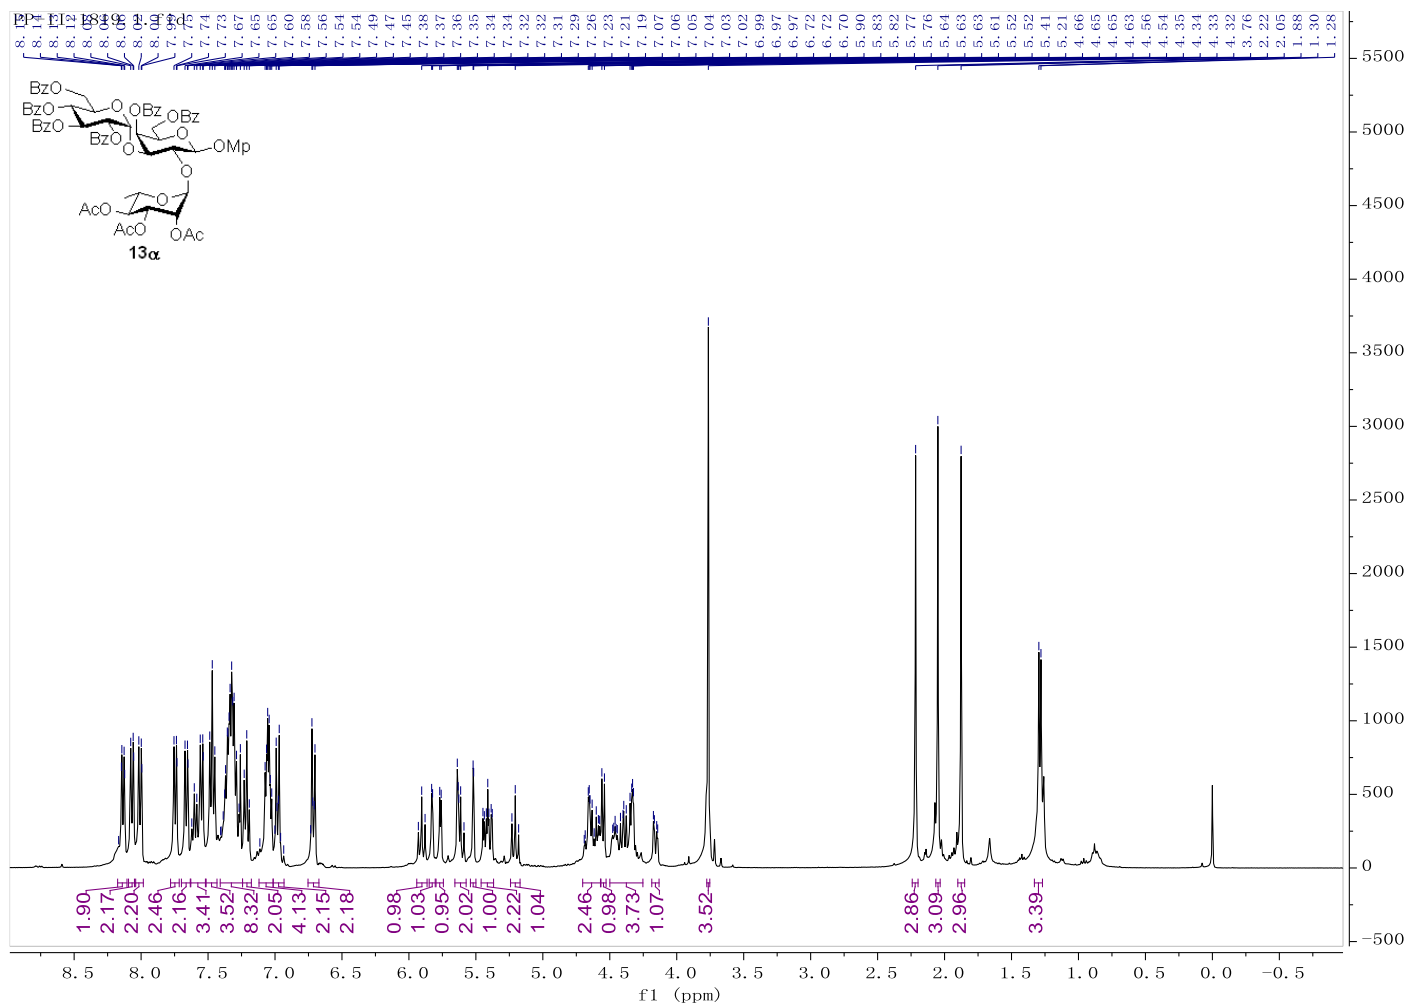

$^1\text{H}$ - $^1\text{H}$  COSY of compound **13 $\alpha$**

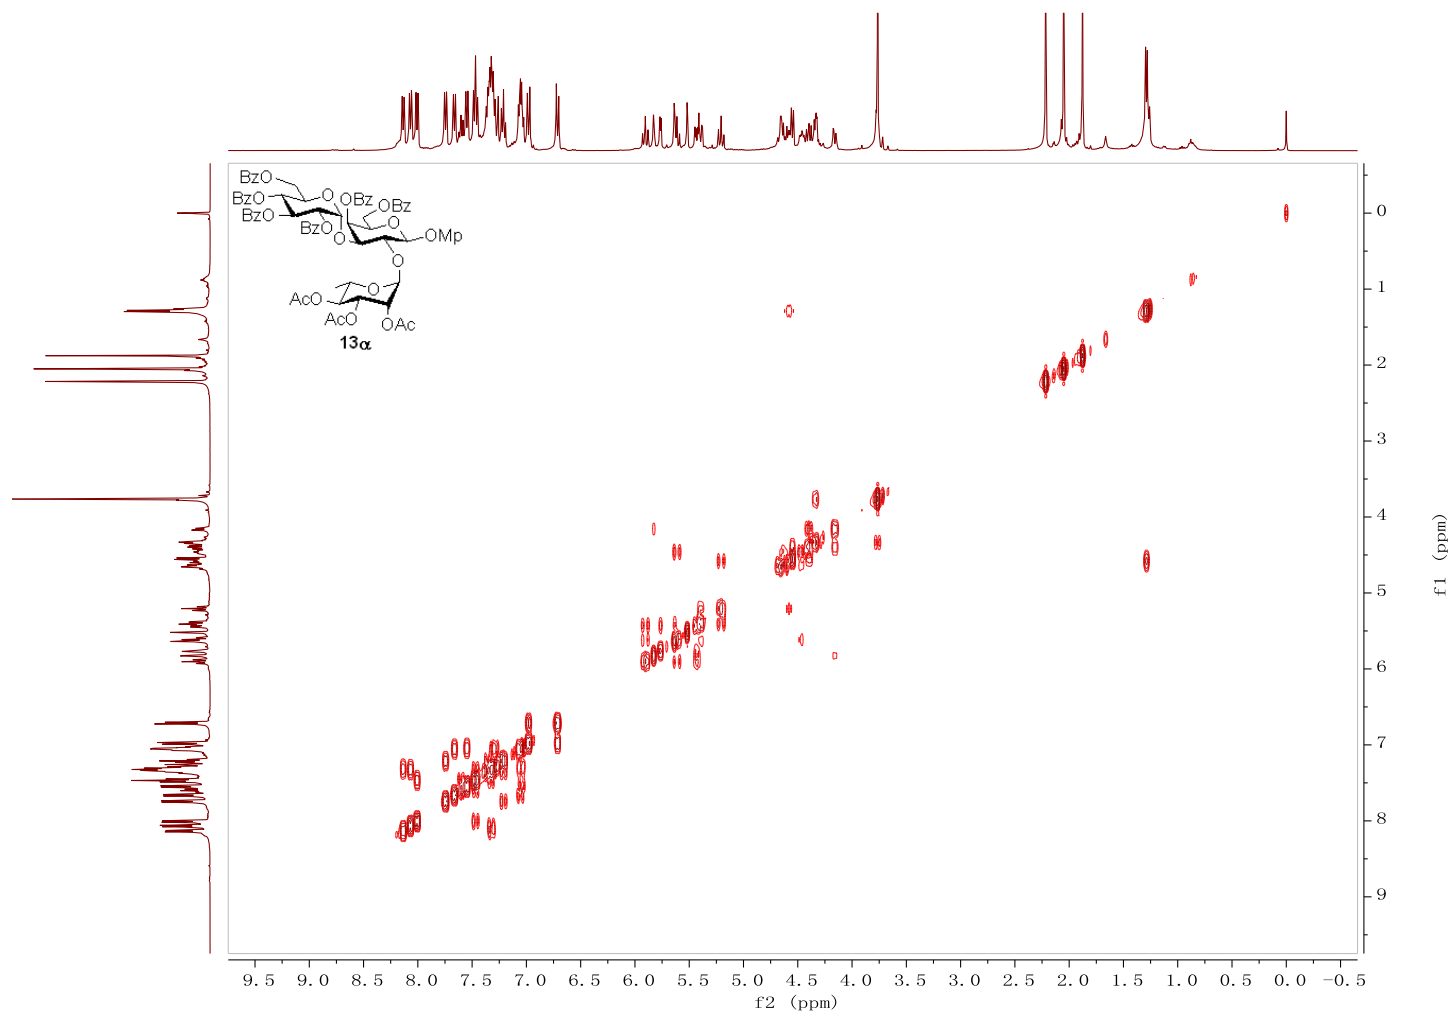

### HSQC of compound **13 $\alpha$**

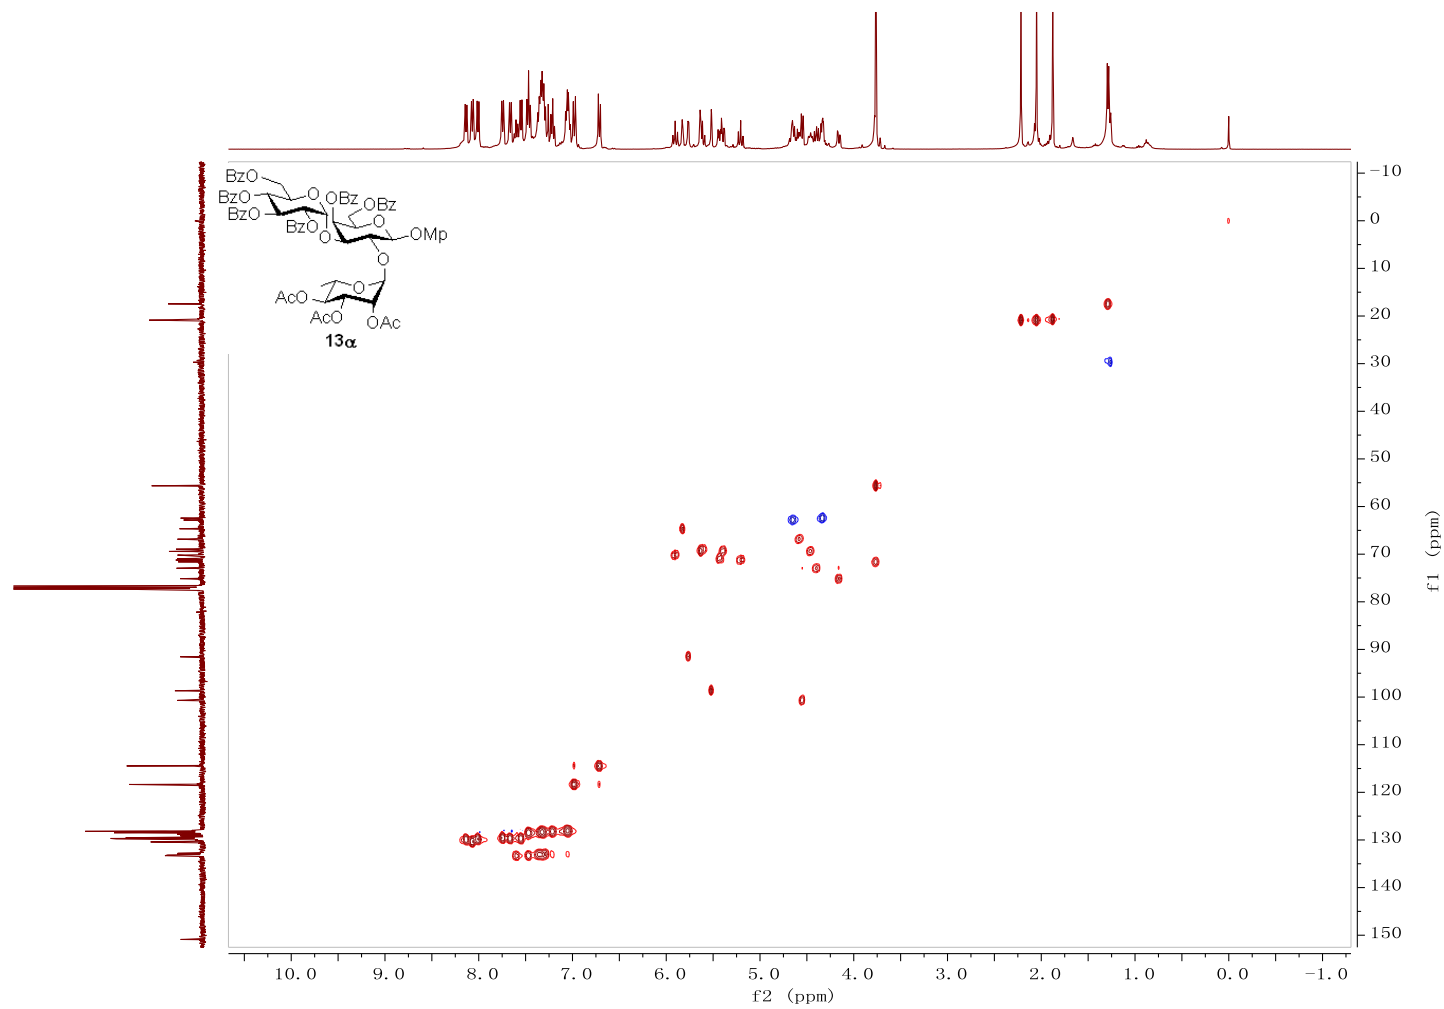

$^{13}\text{C}$  spectrum of compound **13 $\alpha$**  (100 MHz,  $\text{CDCl}_3$ )

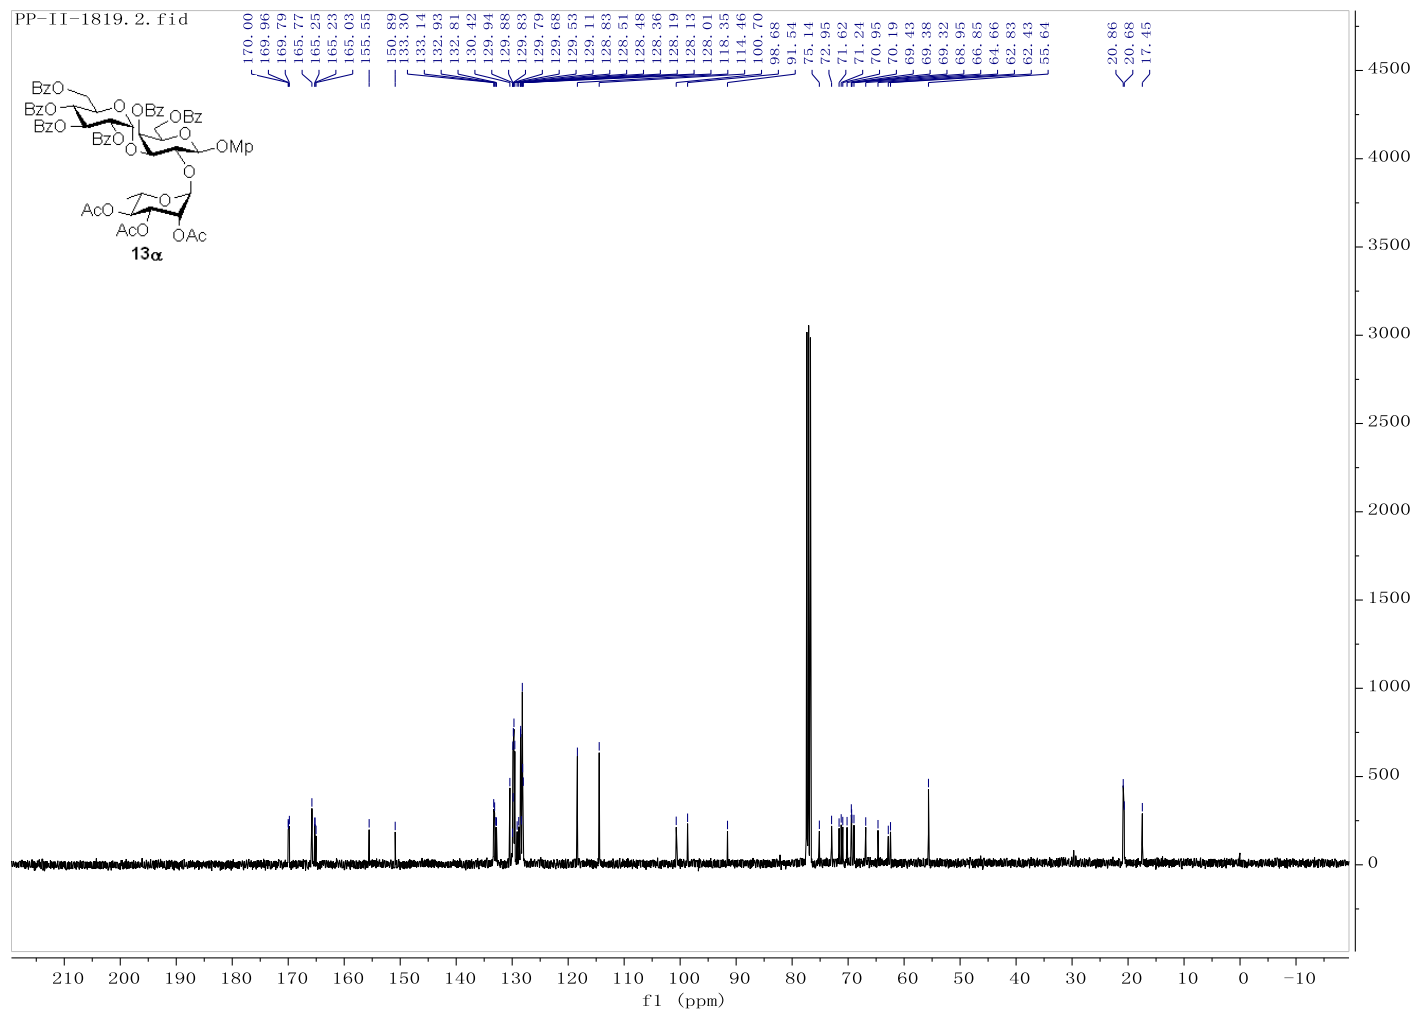

$^1\text{H}$  spectrum of compound **14** (400 MHz,  $\text{CDCl}_3$ )

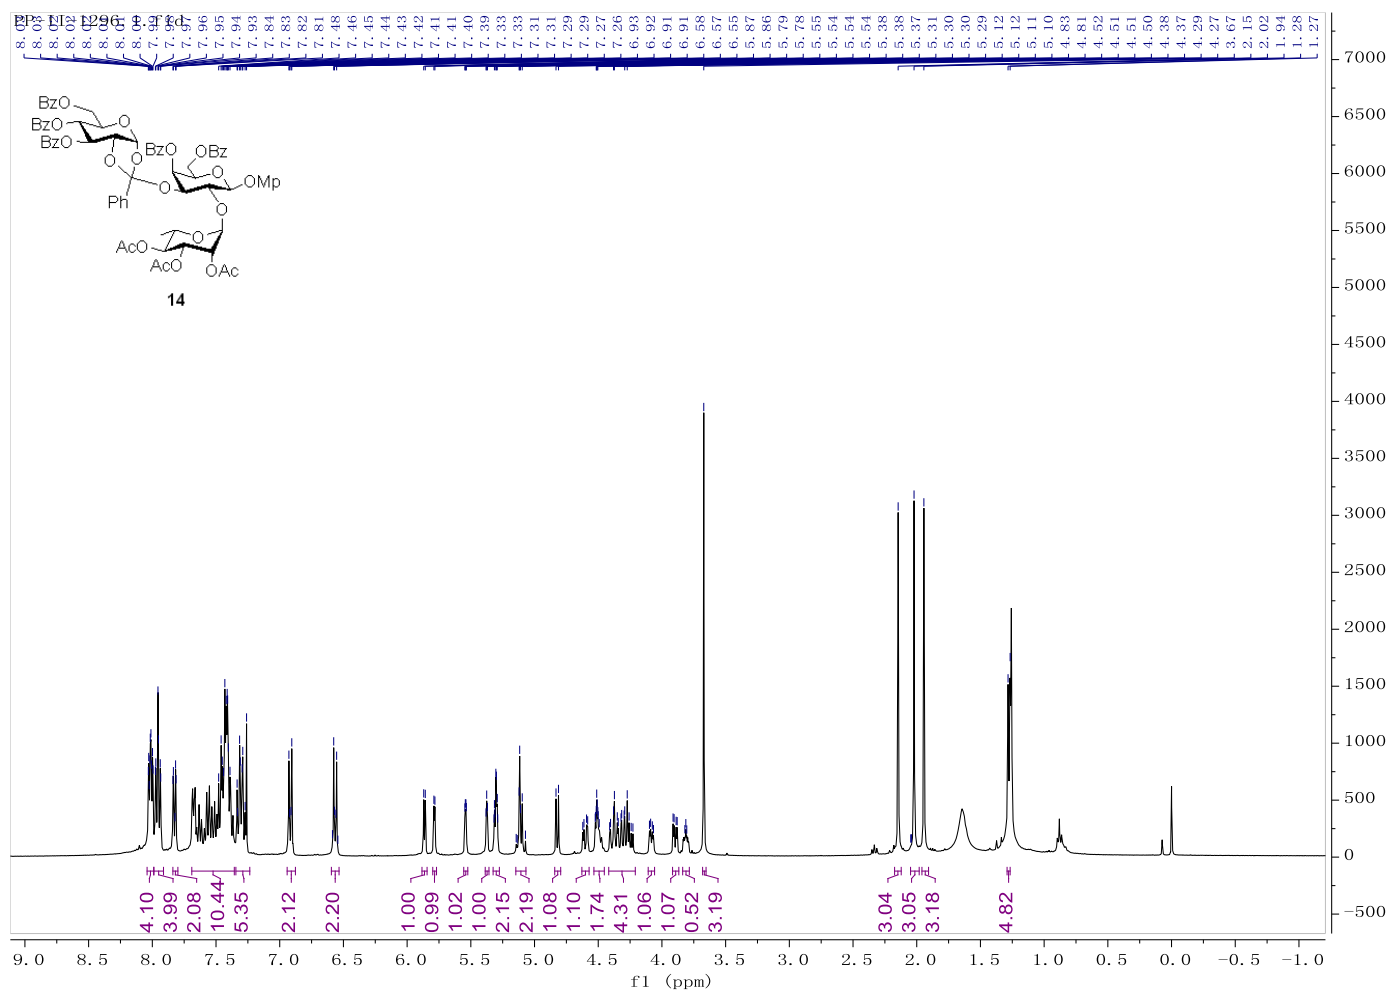

$^1\text{H}$ - $^1\text{H}$  COSY of compound **14**

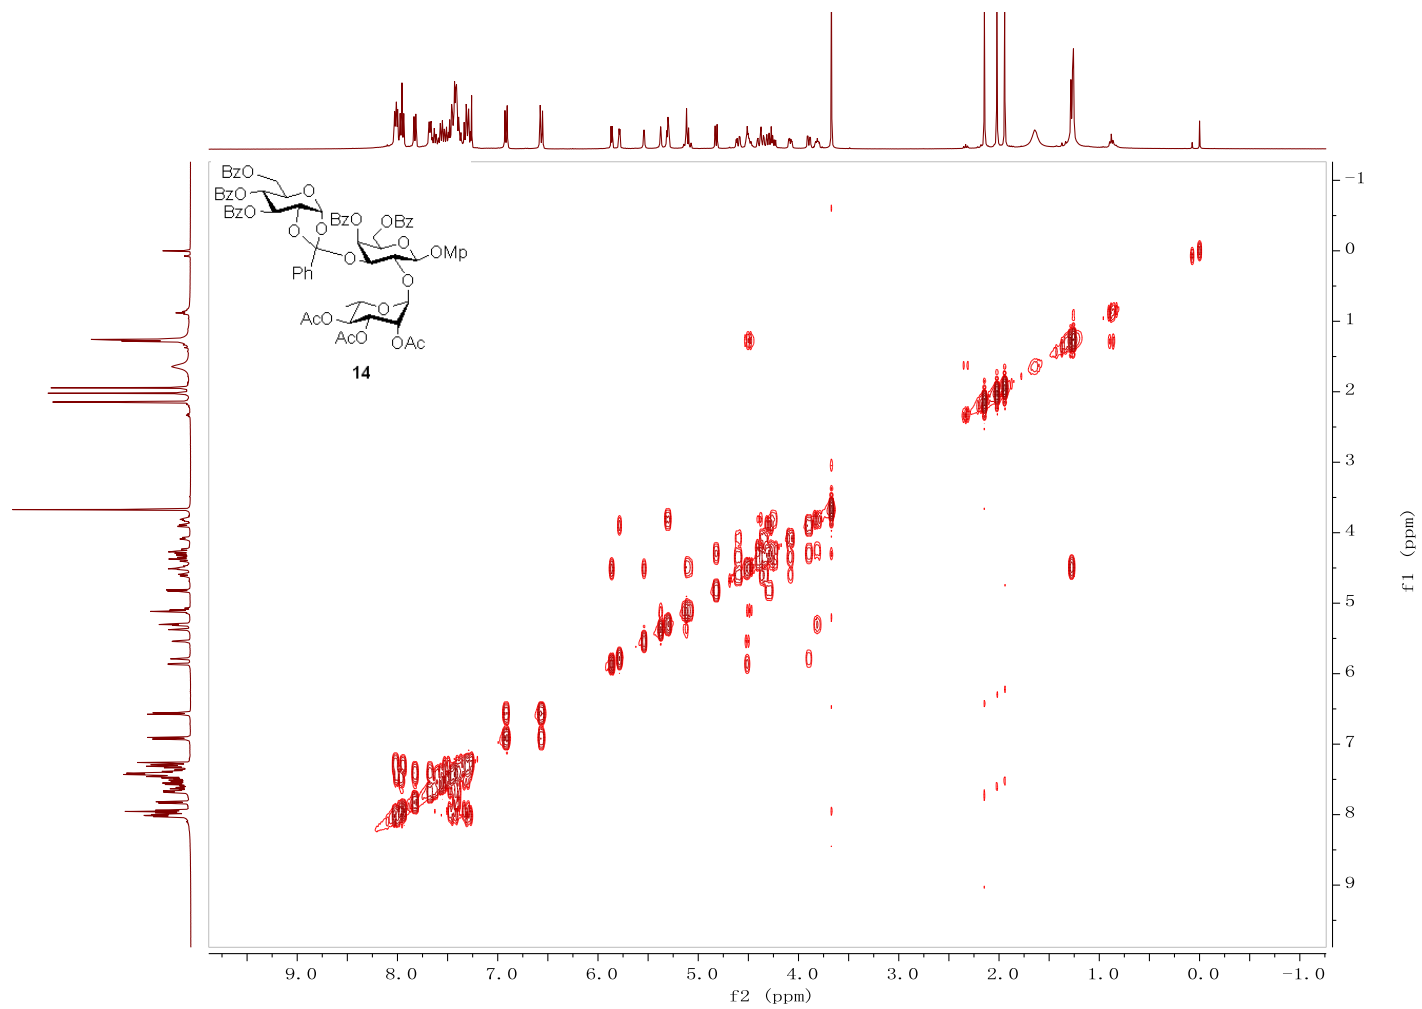

# HSQC of compound 14

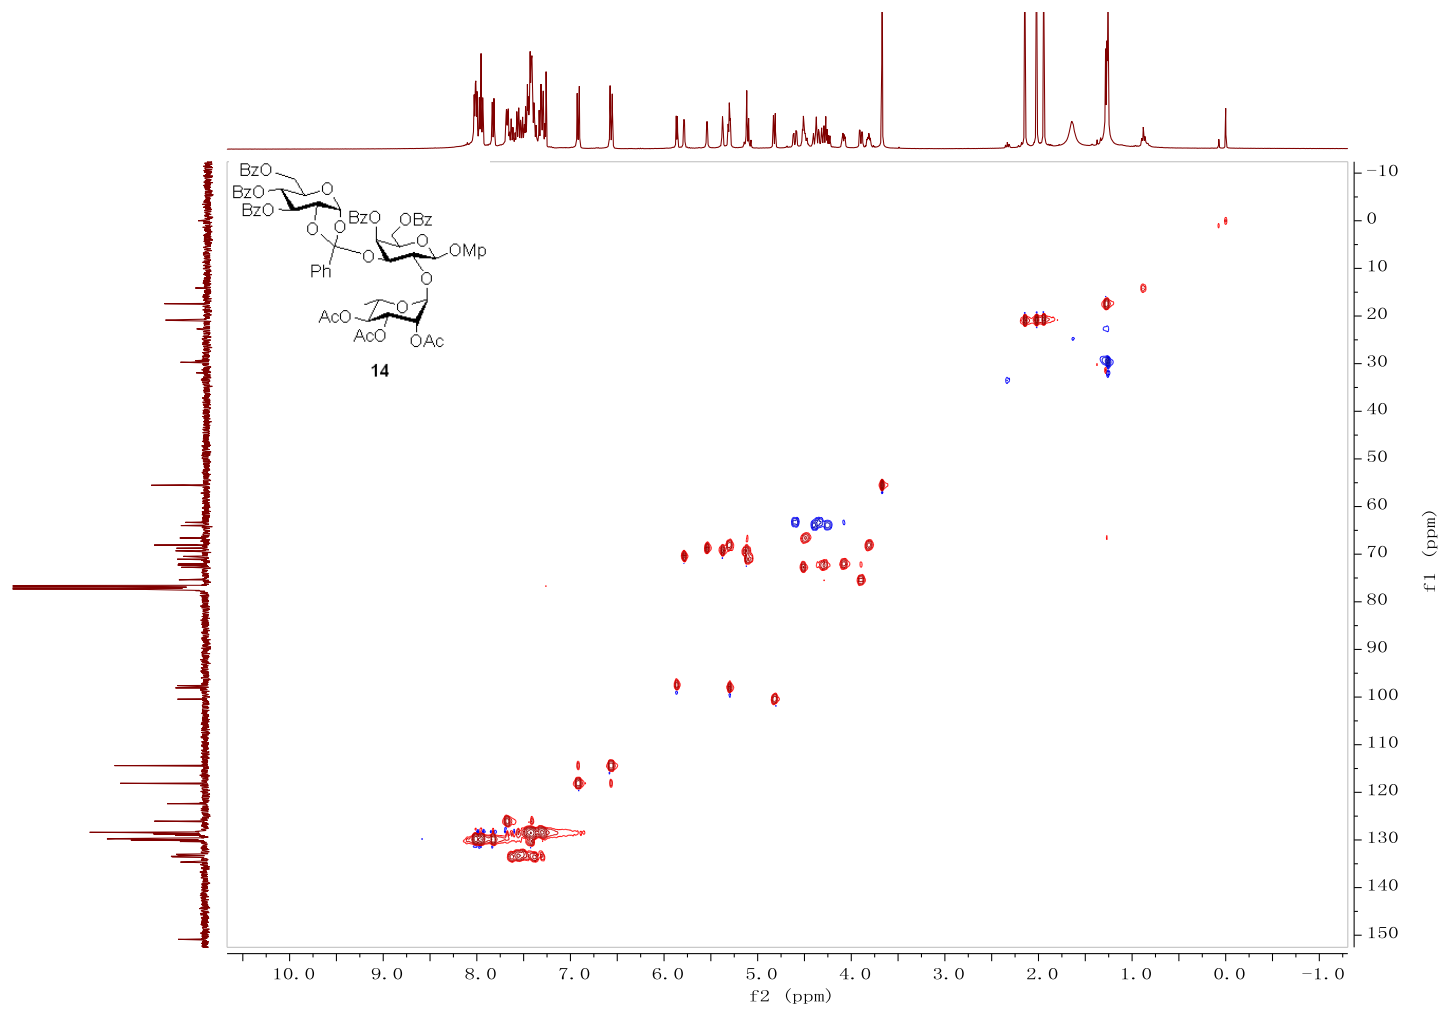

$^{13}\text{C}$  spectrum of compound **14** (100 MHz,  $\text{CDCl}_3$ )

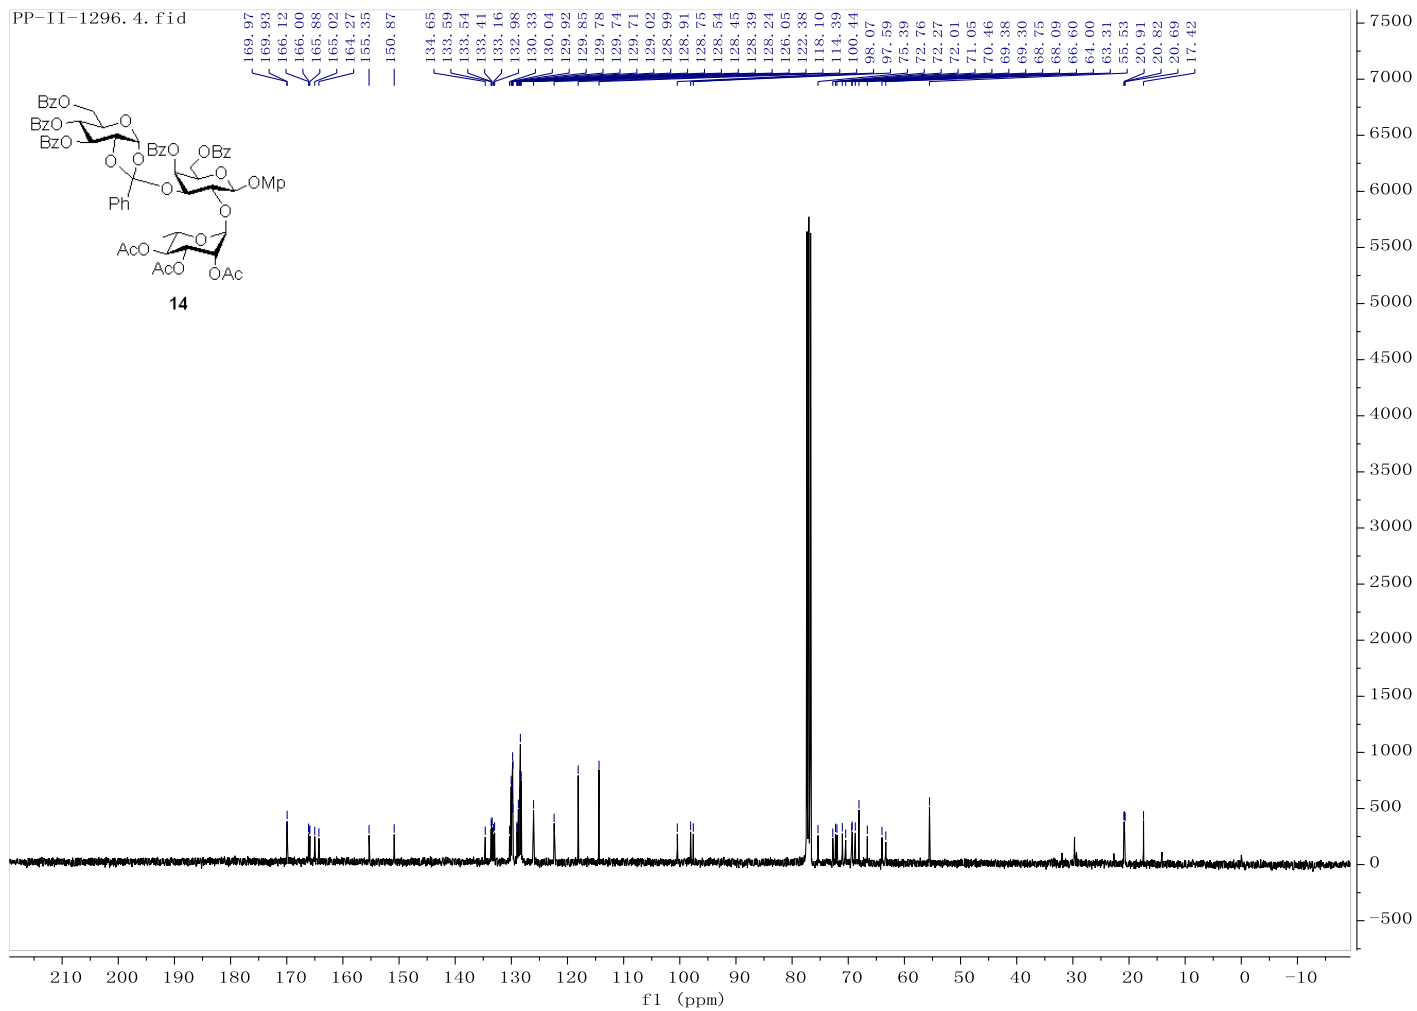



$^1\text{H}$  spectrum of compound **18** (600 MHz,  $\text{CDCl}_3$ )

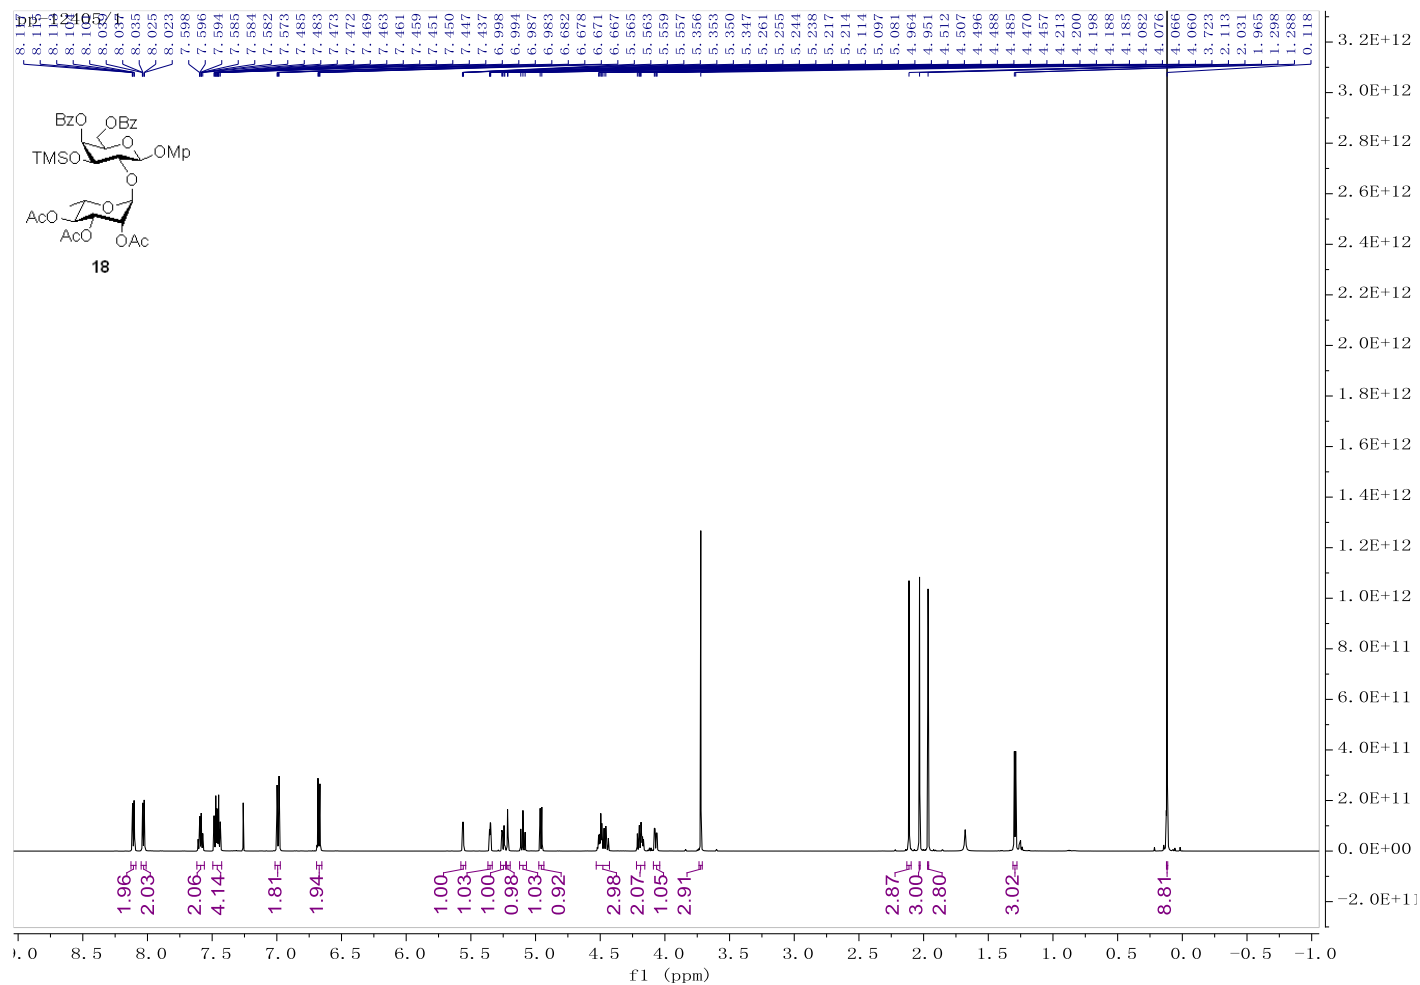

$^1\text{H}$ - $^1\text{H}$  COSY of compound **18**

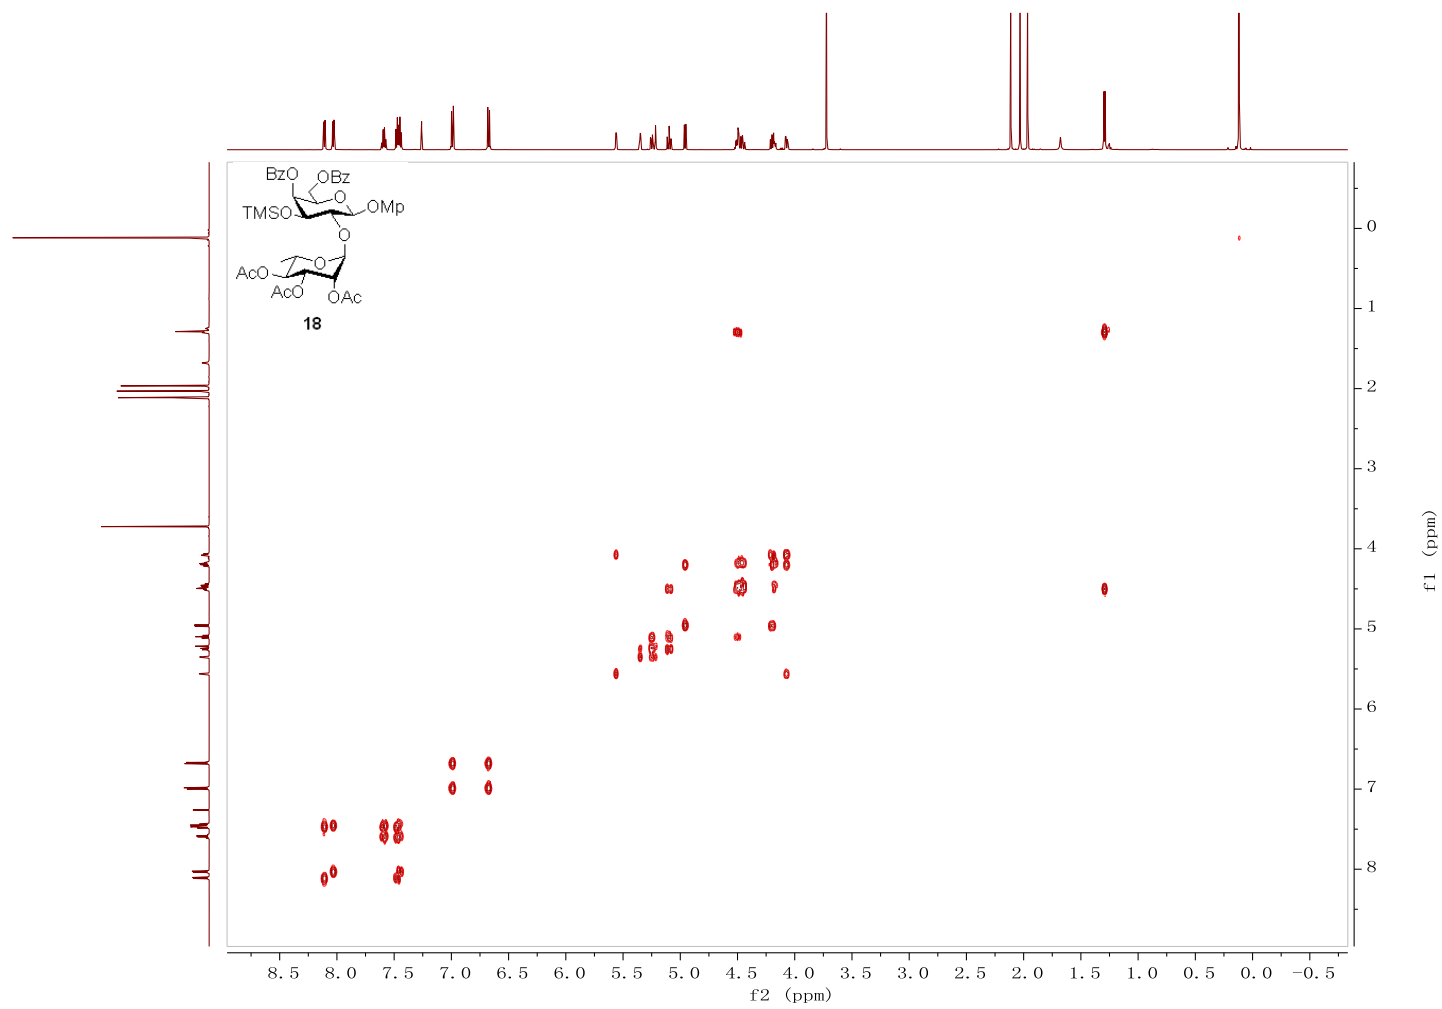

HSQC of compound **18**

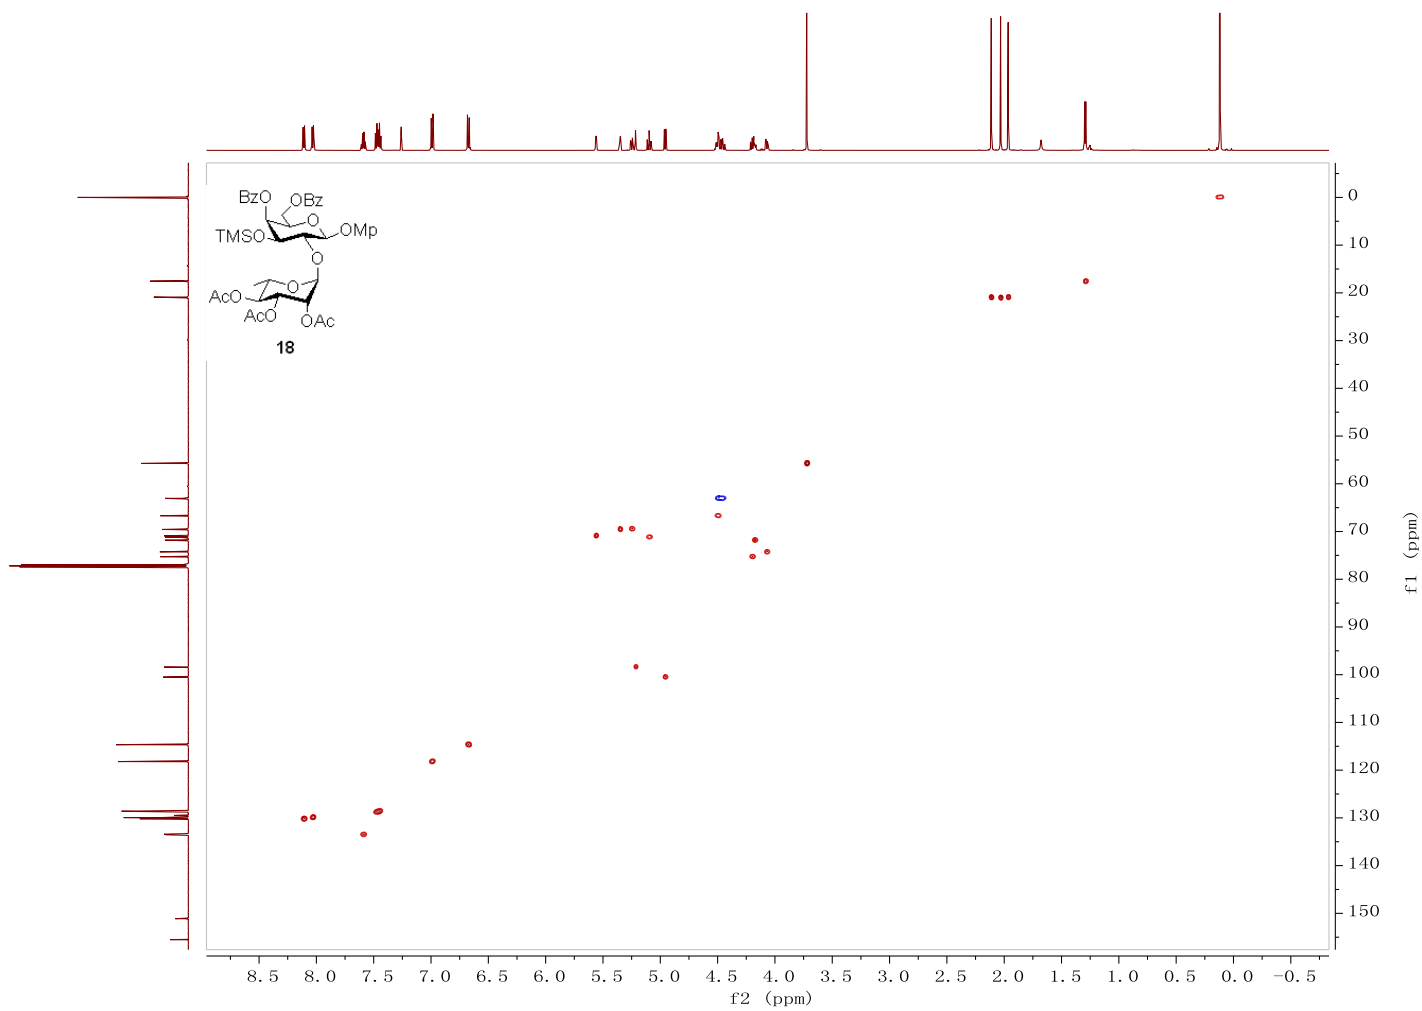

$^{13}\text{C}$  spectrum of compound **15** (150 MHz,  $\text{CDCl}_3$ )

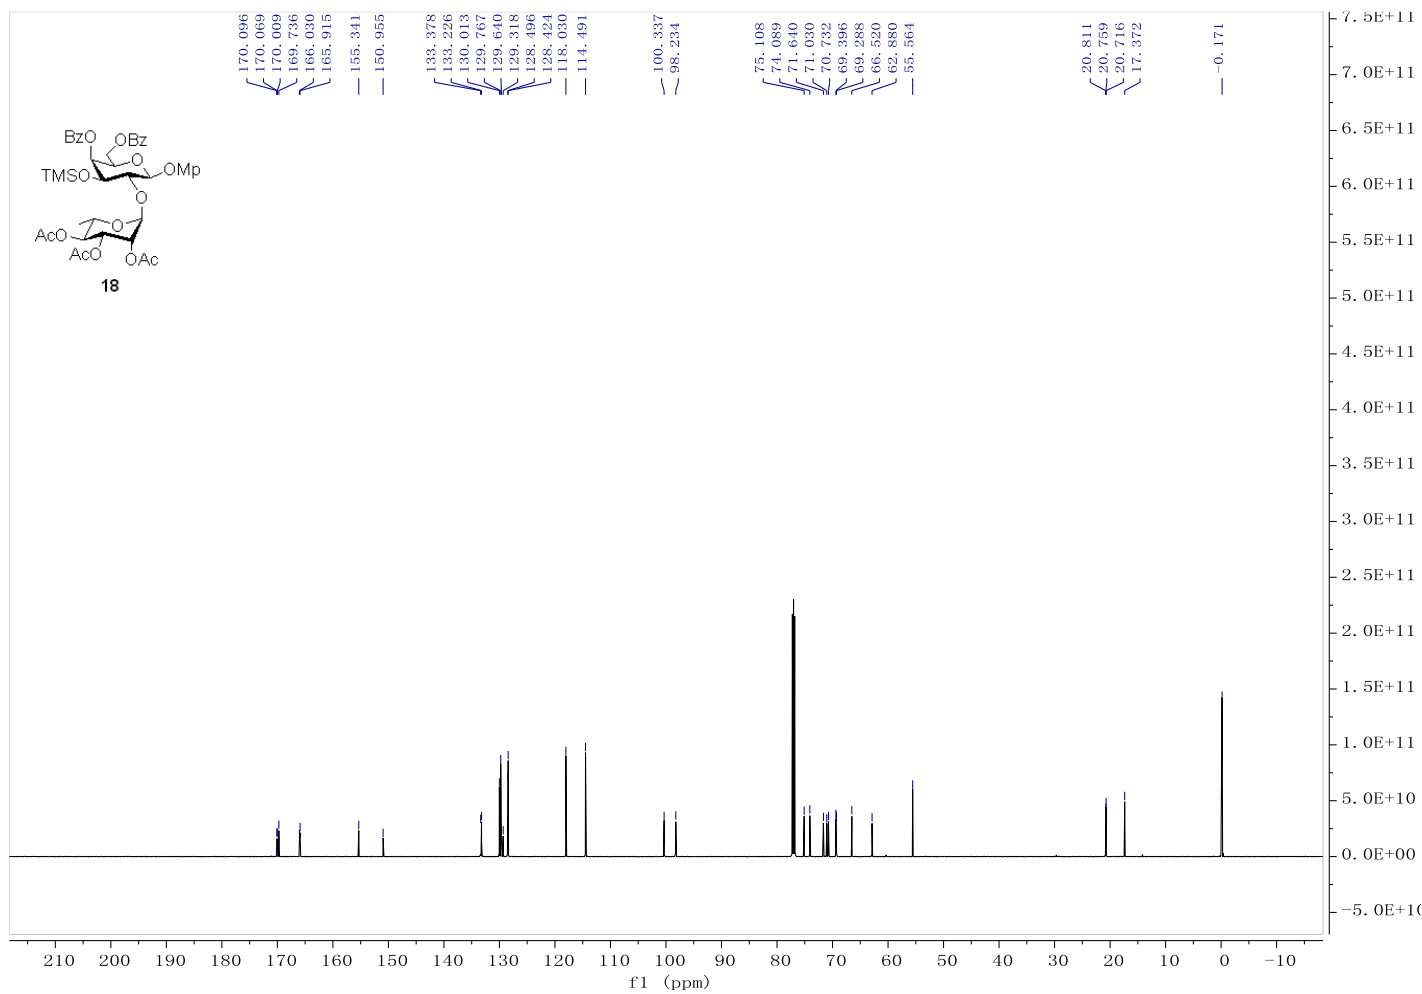

<sup>1</sup>H spectrum of compound **4** (400 MHz, CDCl<sub>3</sub>)

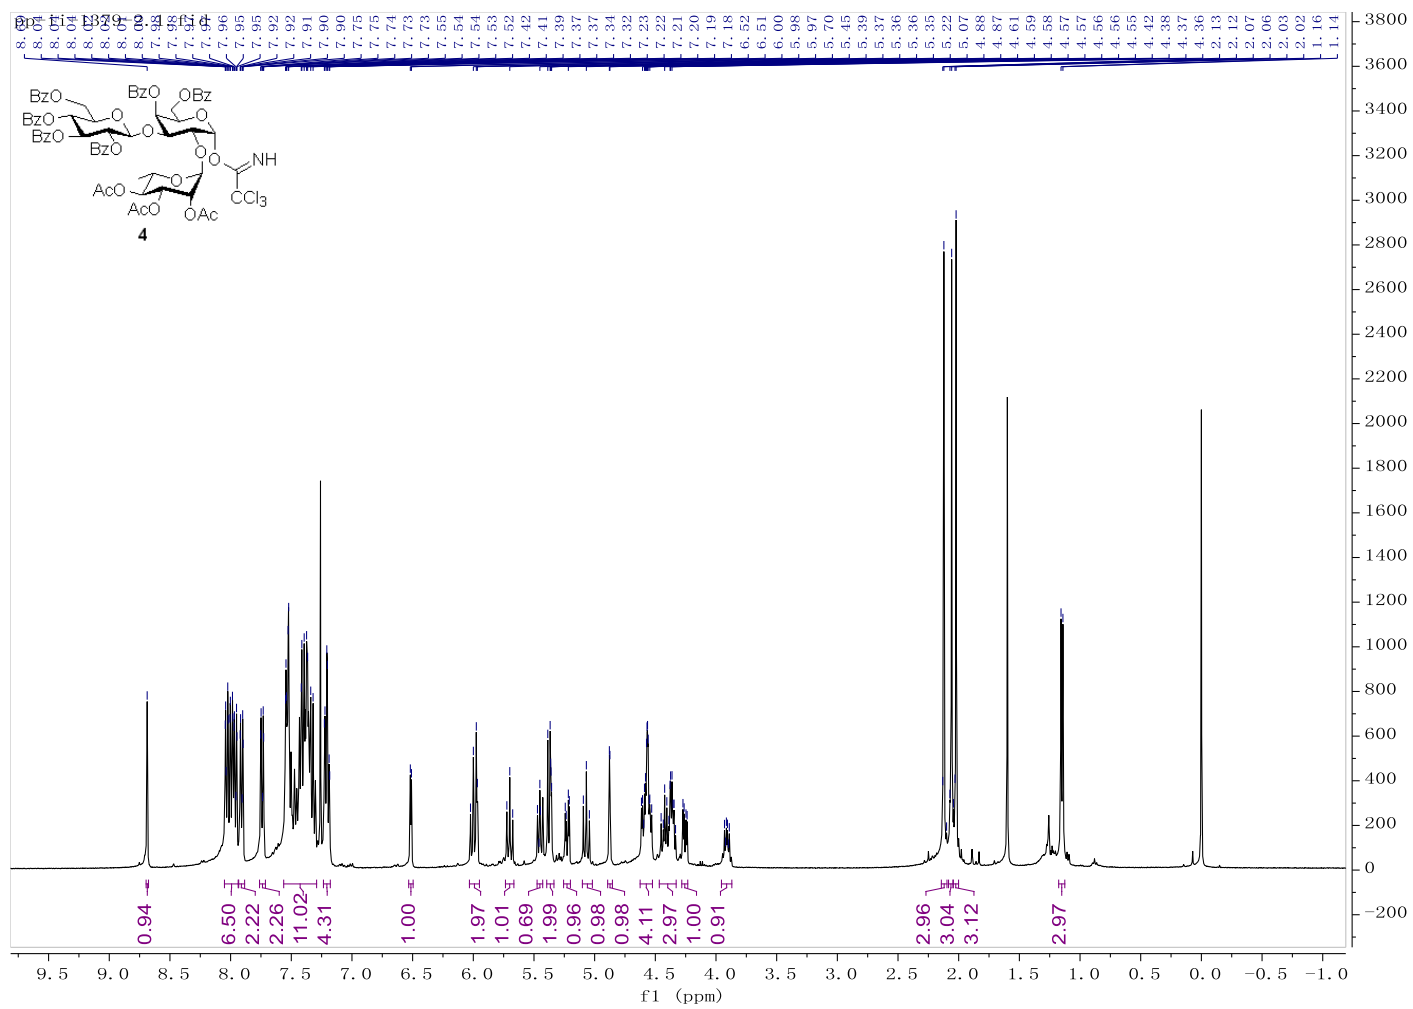

$^1\text{H}$ - $^1\text{H}$  COSY of compound 4

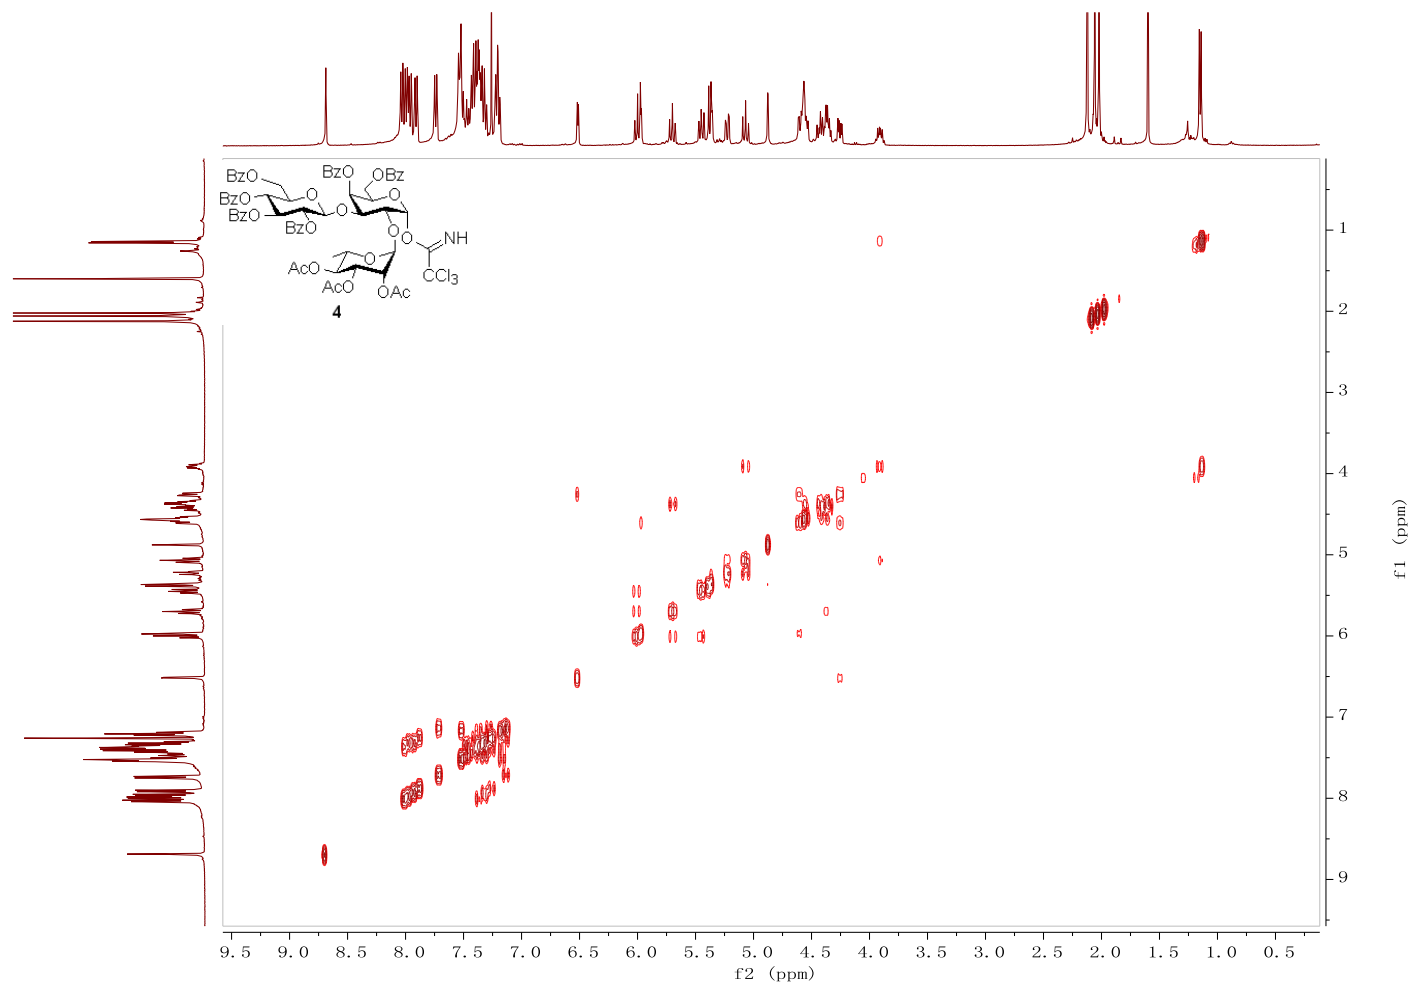

# HSQC of compound 4

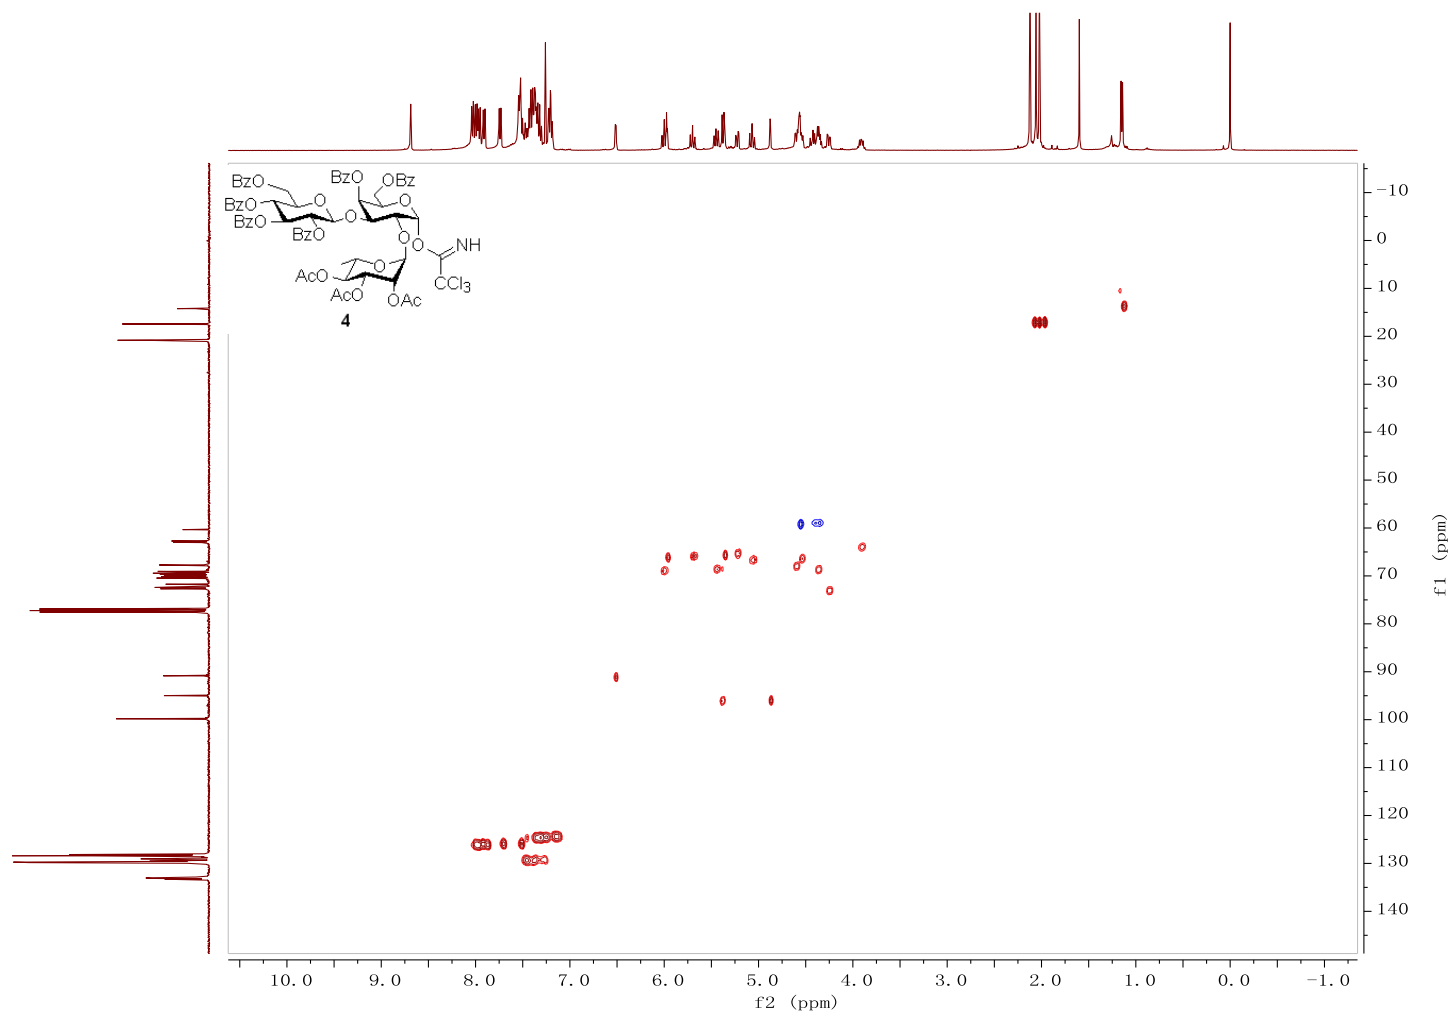

$^{13}\text{C}$  spectrum of compound **4** (100 MHz,  $\text{CDCl}_3$ )

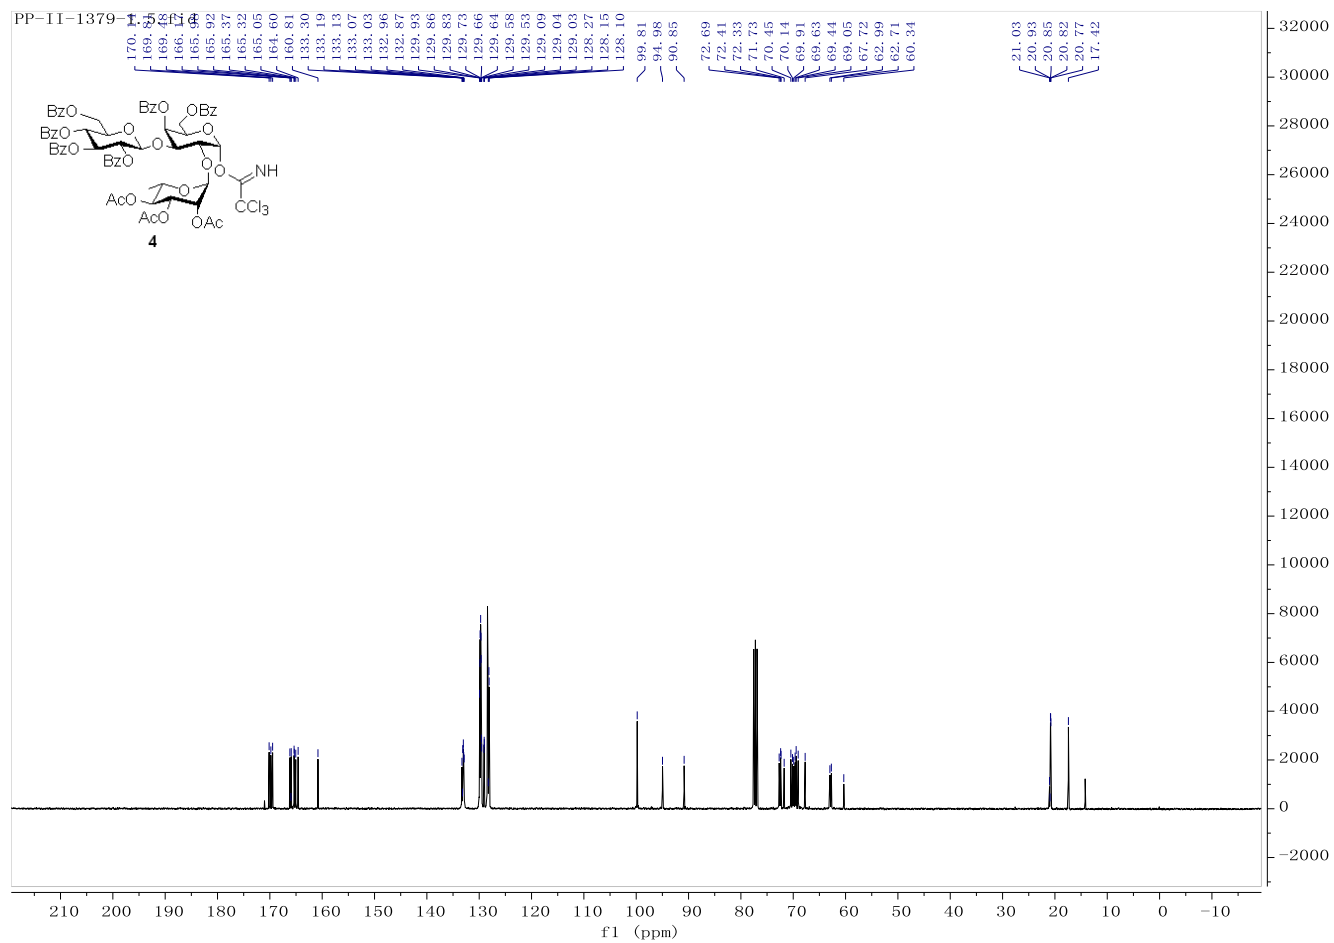



$^1\text{H}$  spectrum of compound **16** (400 MHz,  $\text{CDCl}_3$ )

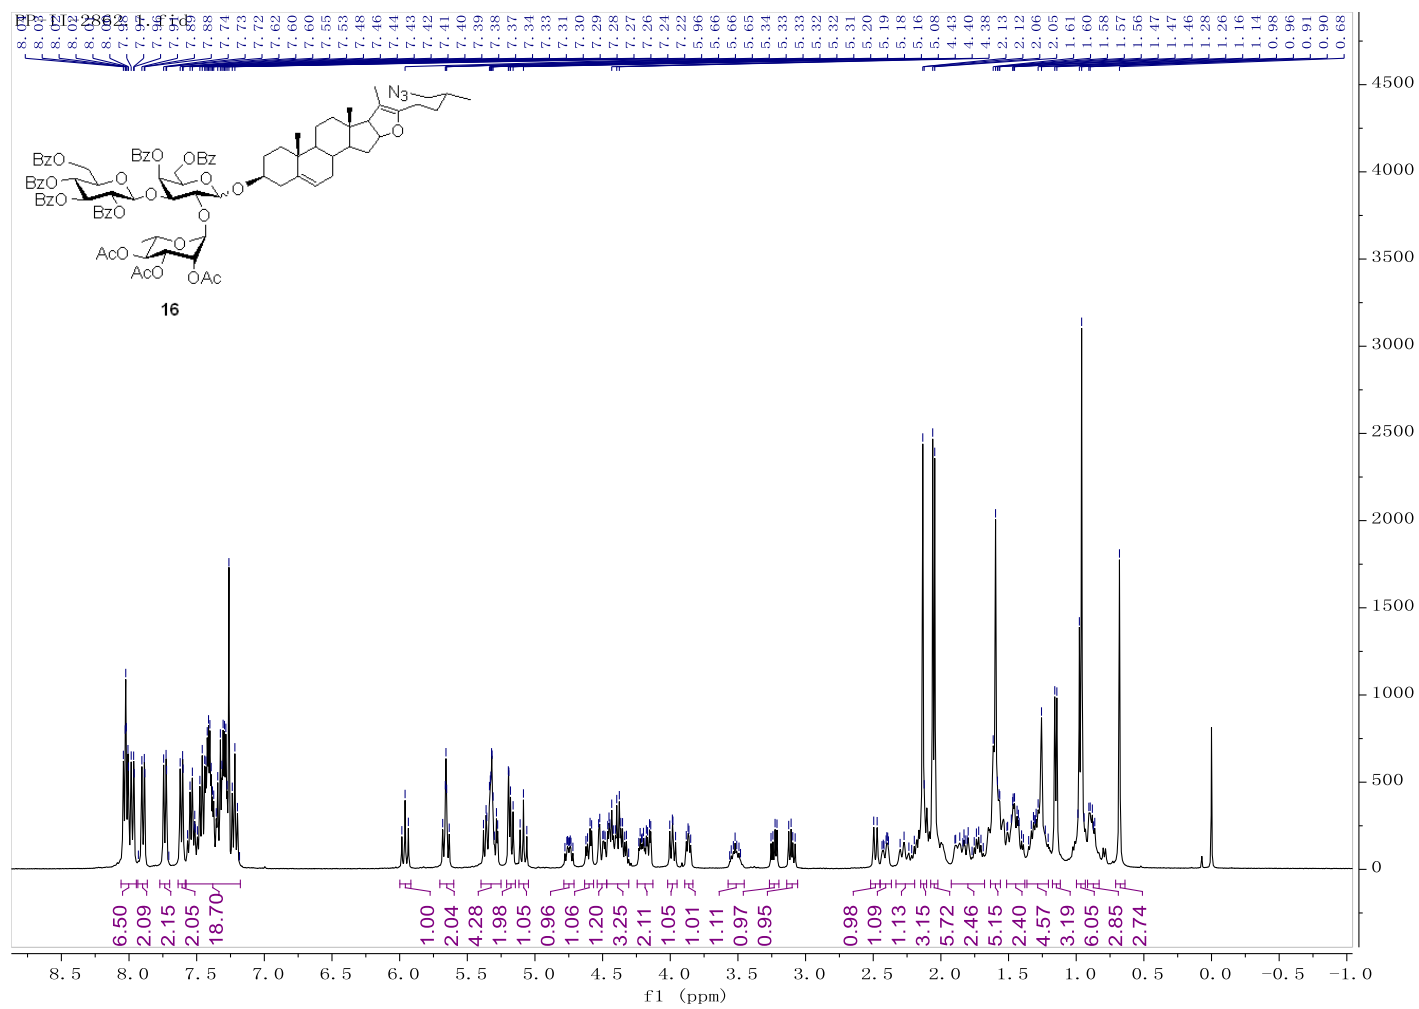

$^1\text{H}$ - $^1\text{H}$  COSY of compound **16**

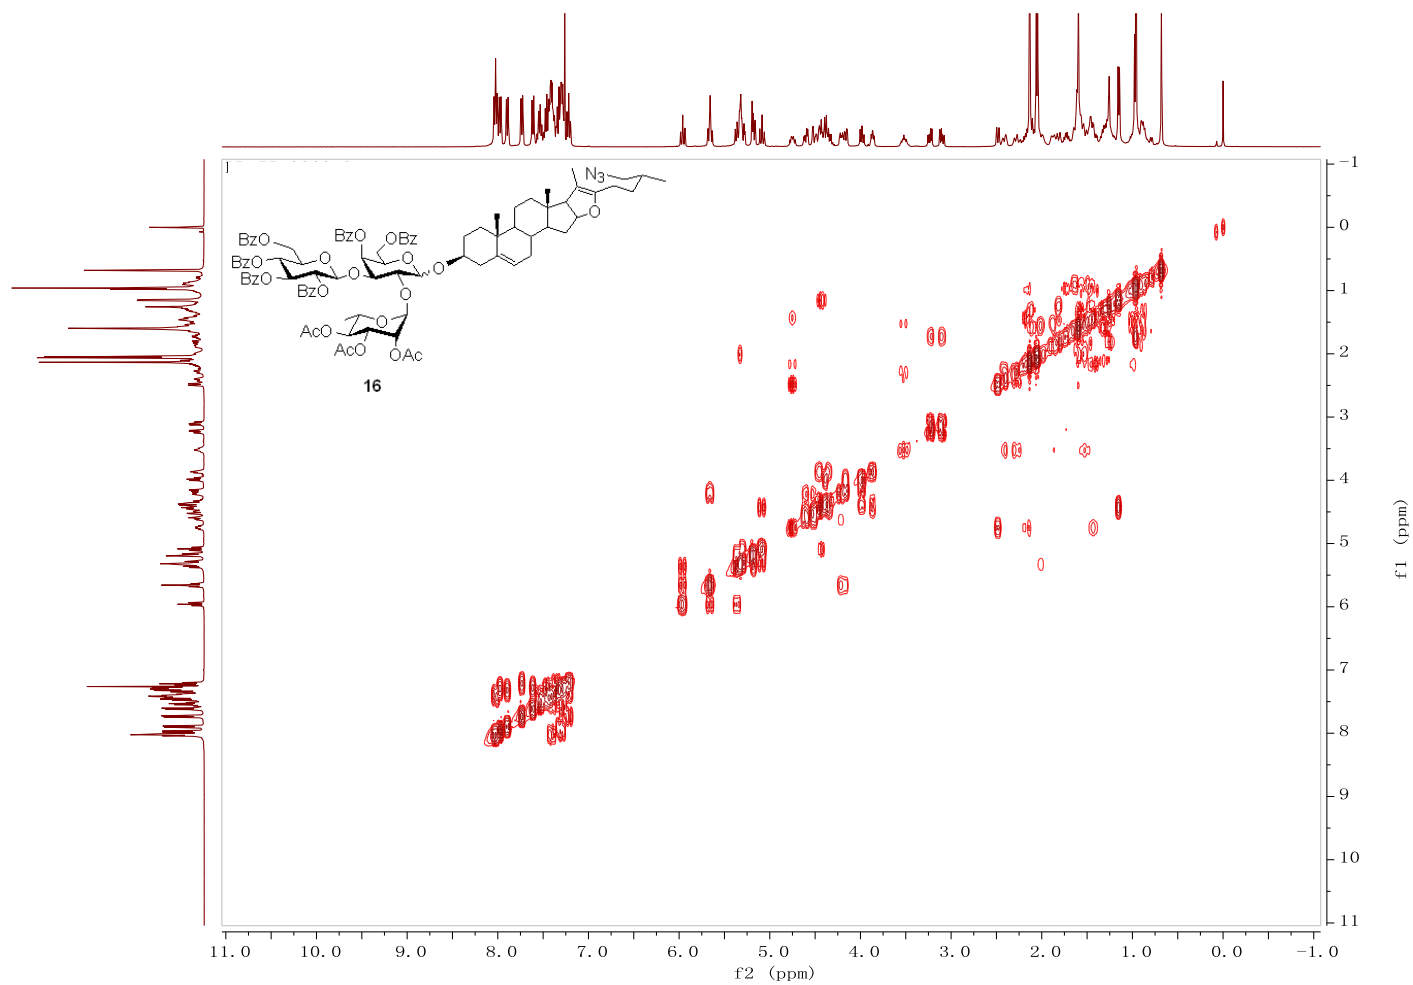

# HSQC of compound 16

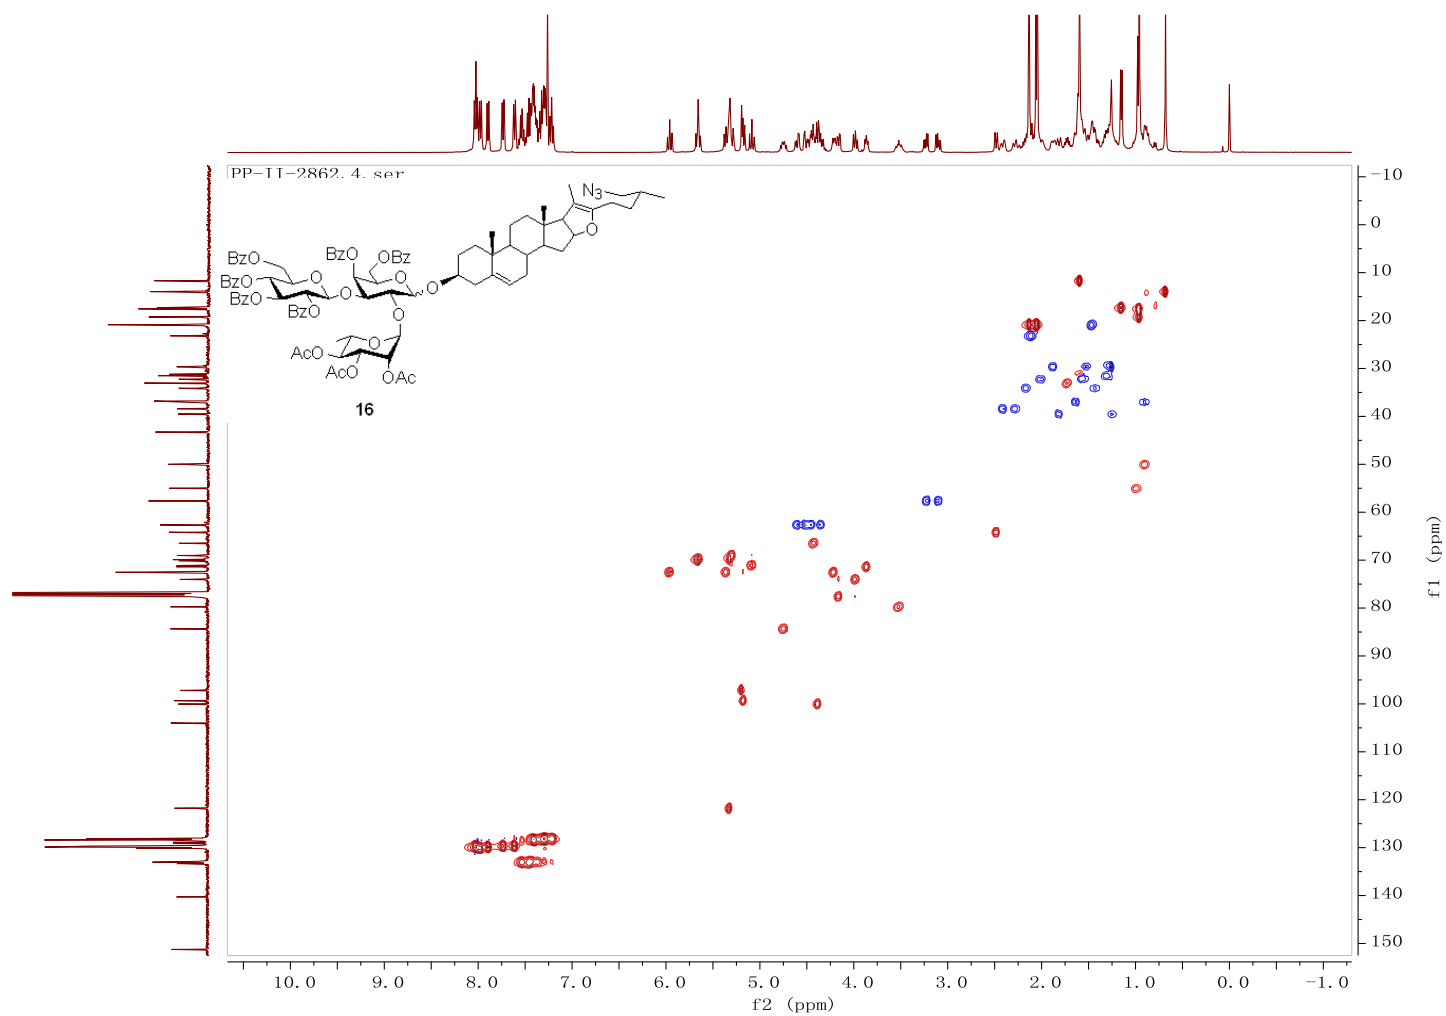

$^{13}\text{C}$  spectrum of compound **16** (100 MHz,  $\text{CDCl}_3$ )

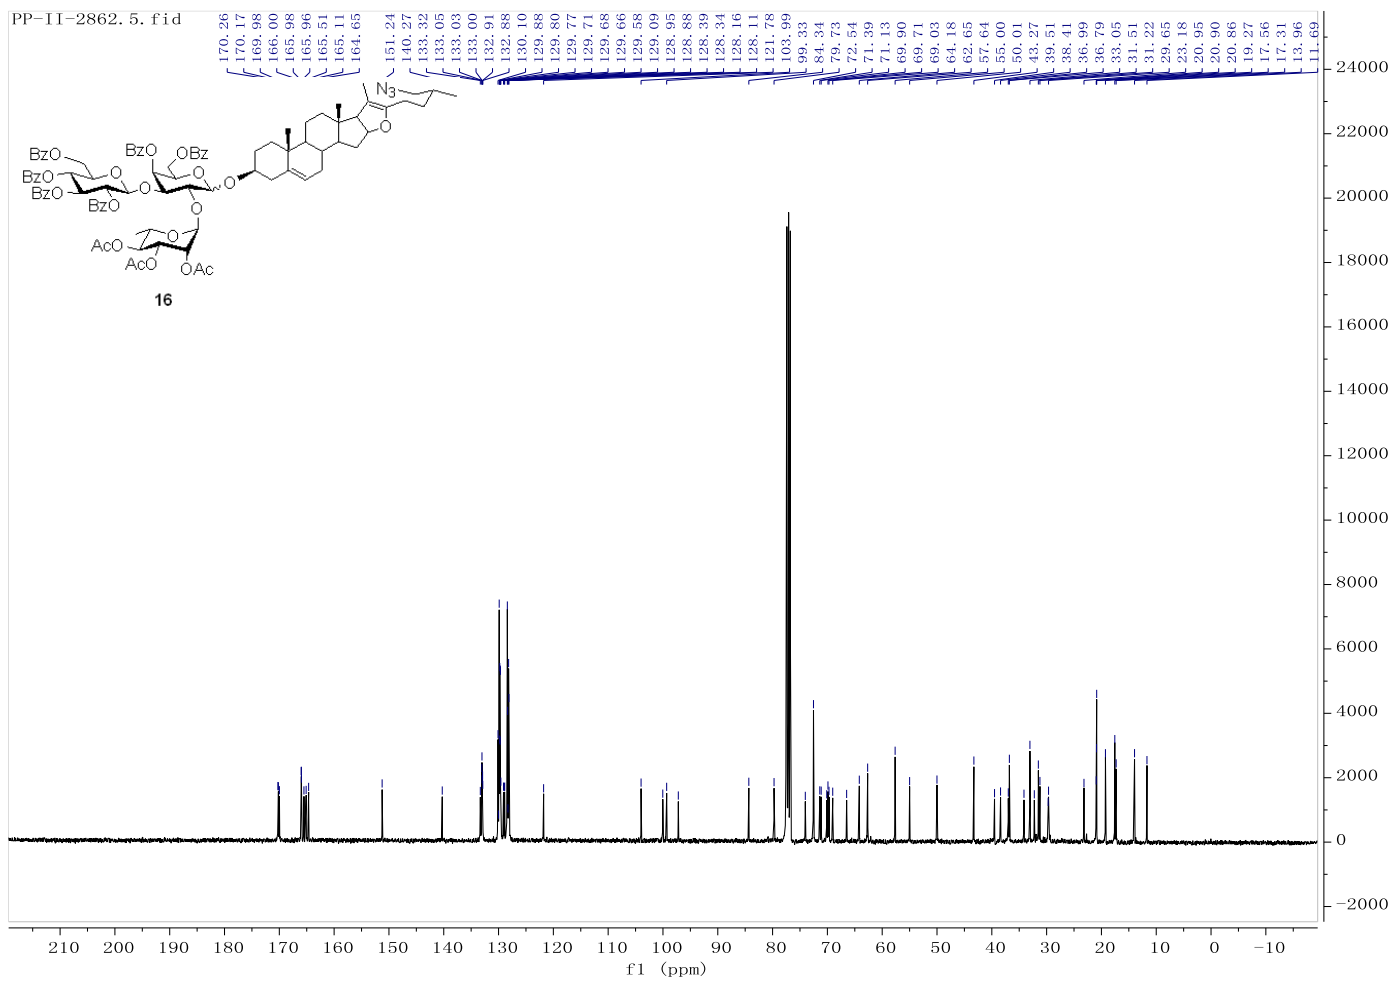

$^1\text{H}$  spectrum of compound **17** (400 MHz,  $\text{CDCl}_3$ )

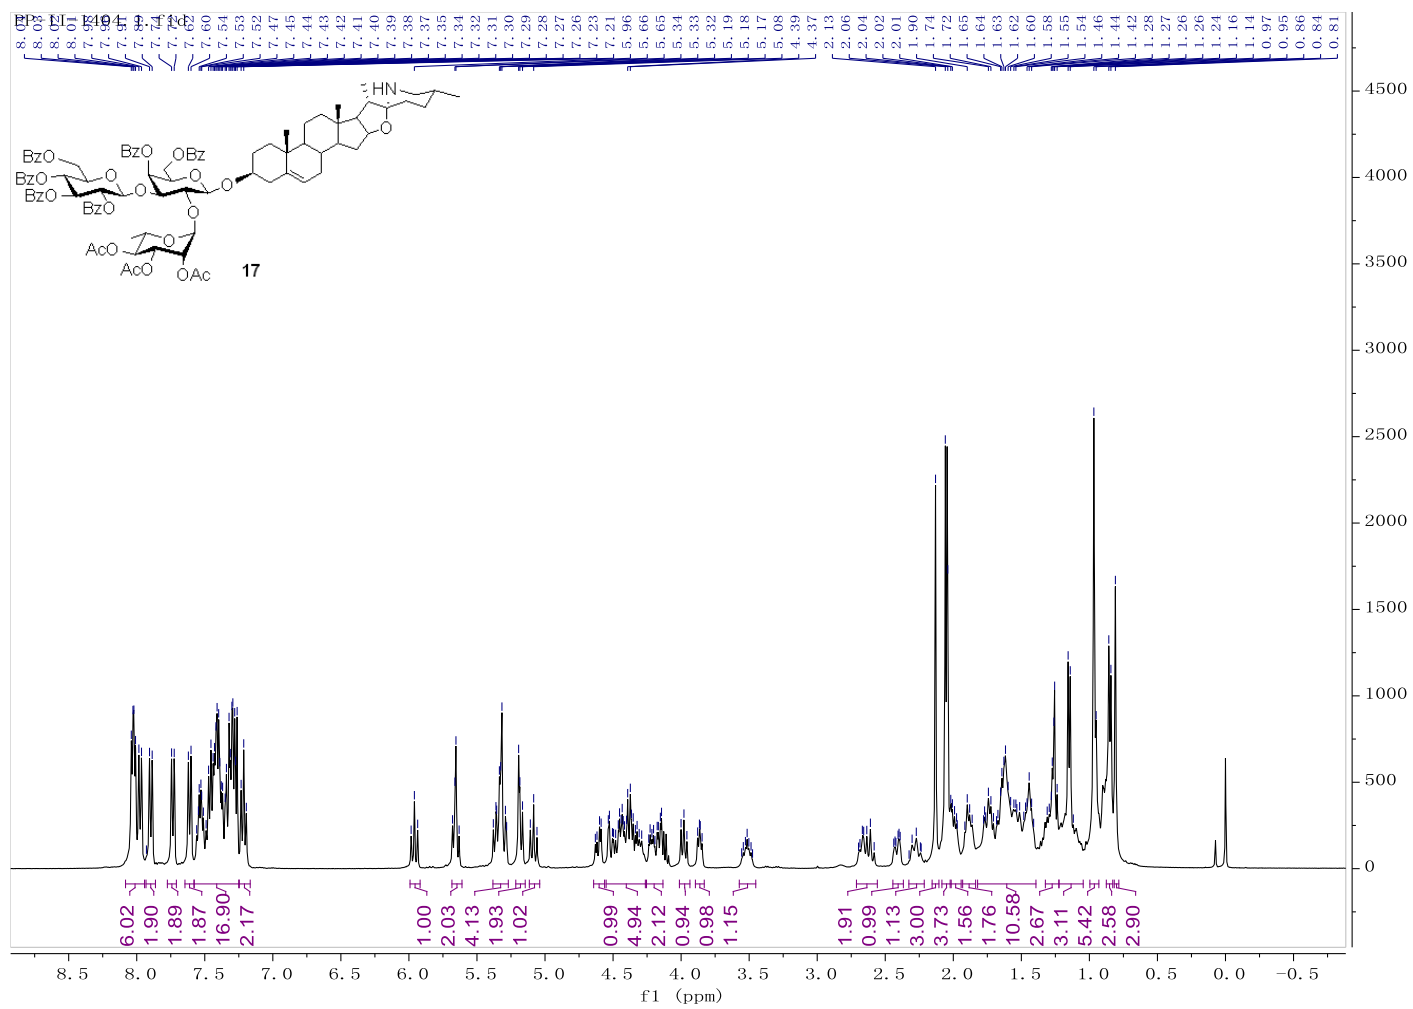

$^1\text{H}$ - $^1\text{H}$  COSY of compound 17

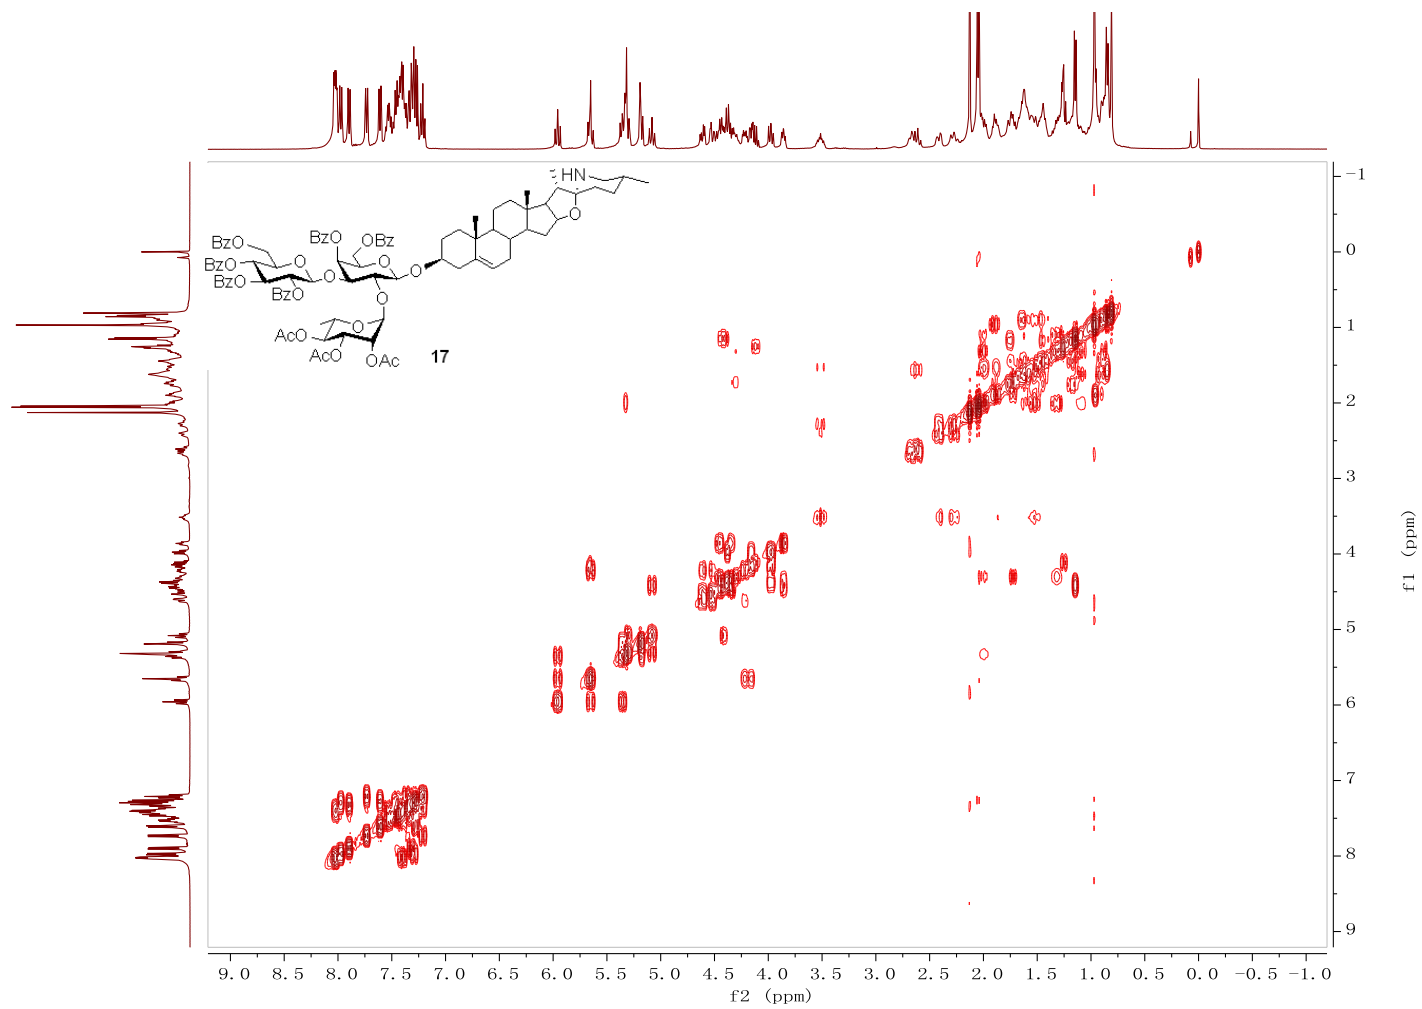

# HSQC of compound 17

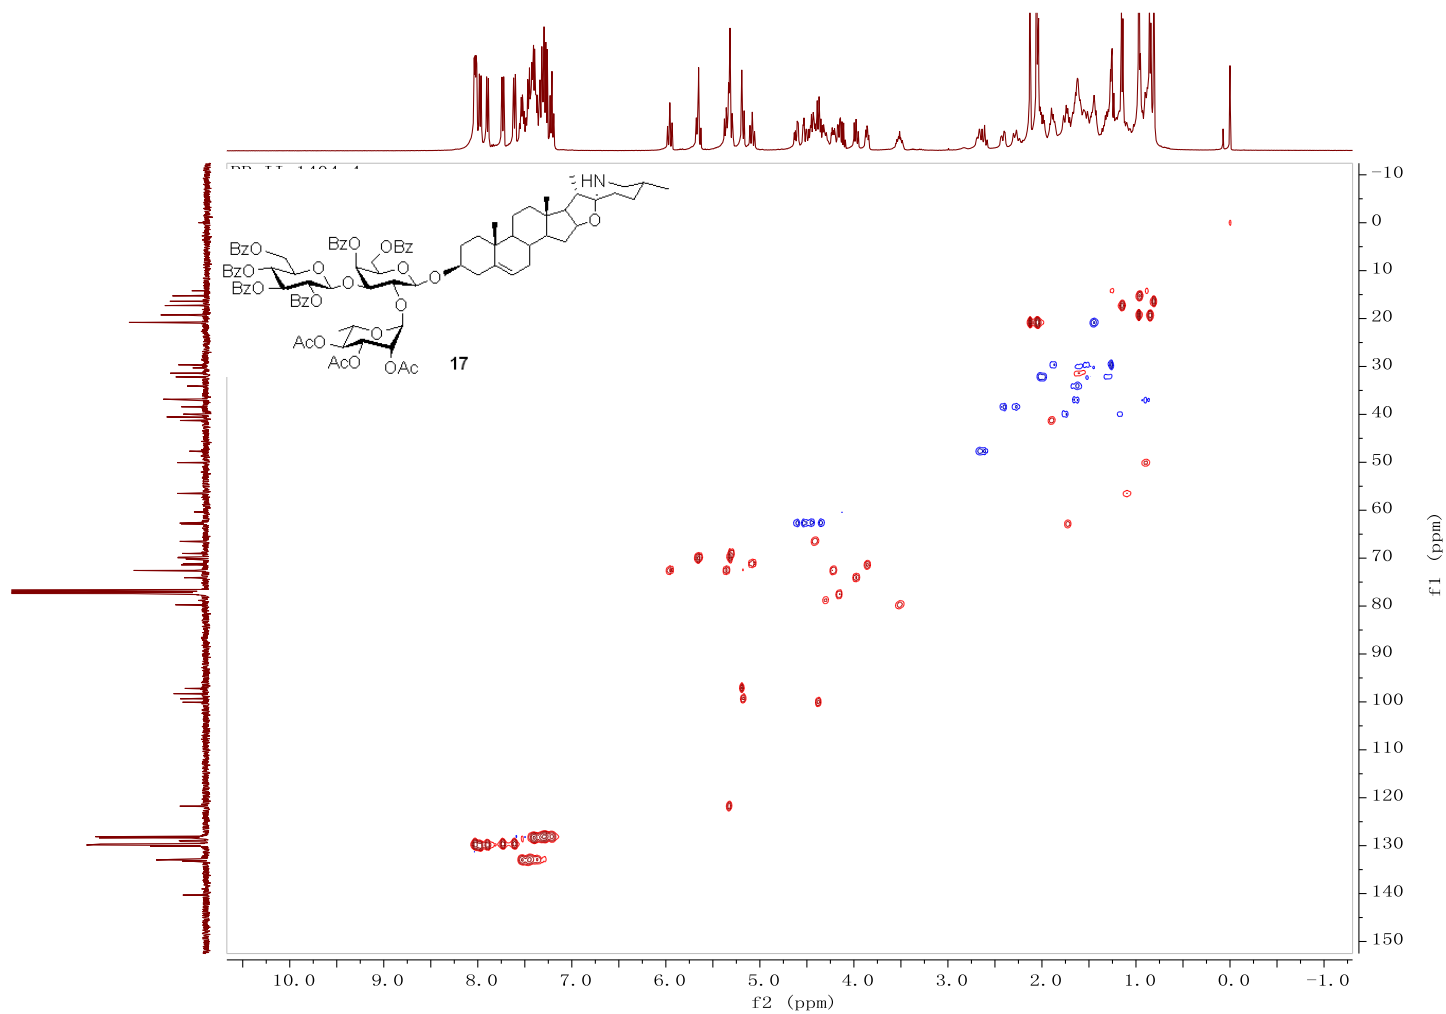

$^{13}\text{C}$  spectrum of compound **17** (100 MHz,  $\text{CDCl}_3$ )

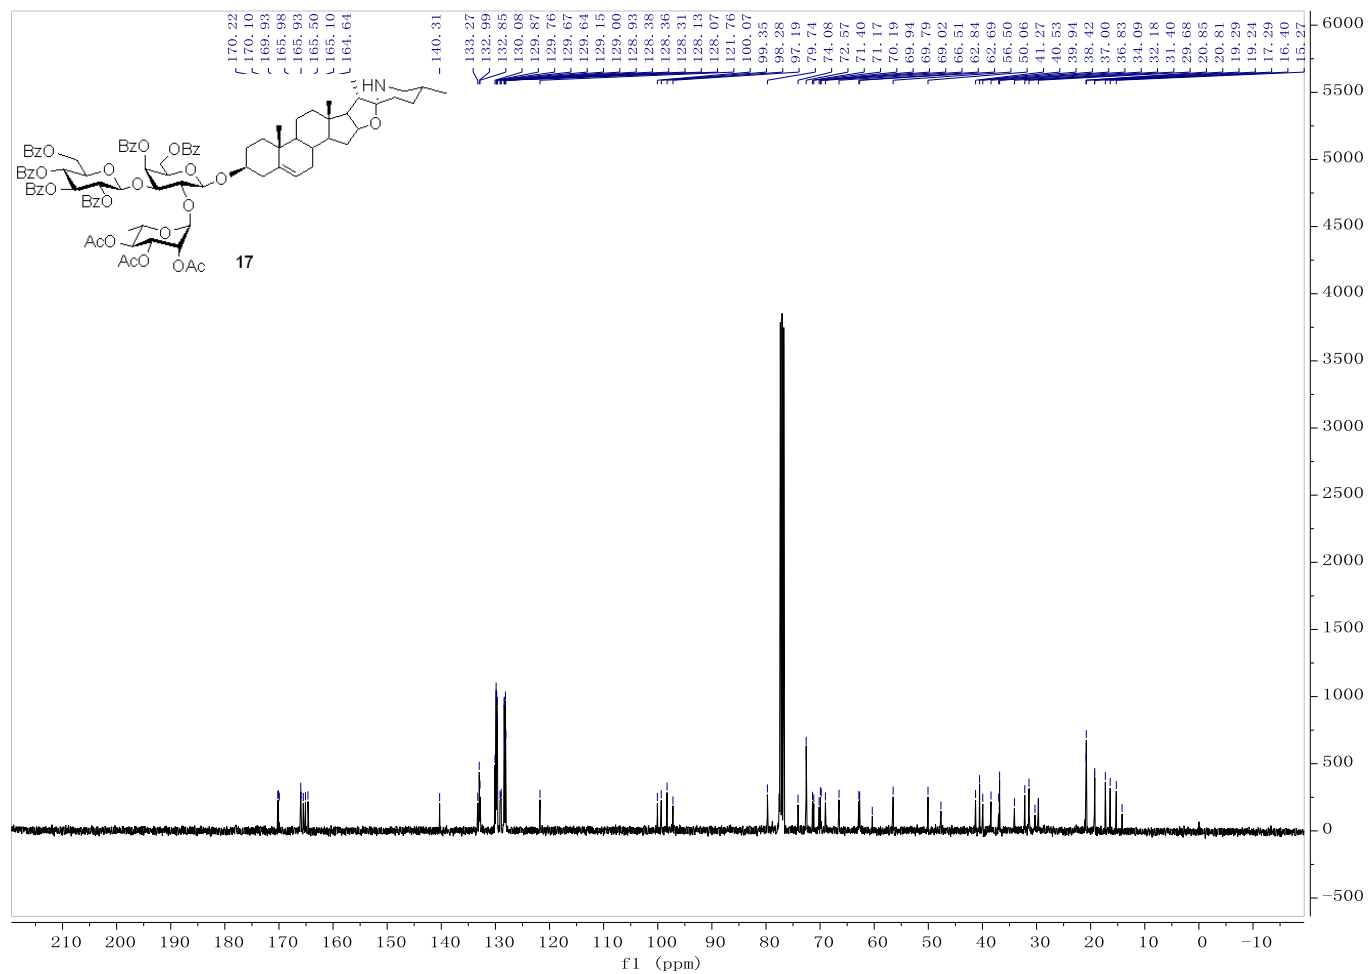



<sup>1</sup>H spectrum of compound **1** (400 MHz, pyridine-d<sub>5</sub>)

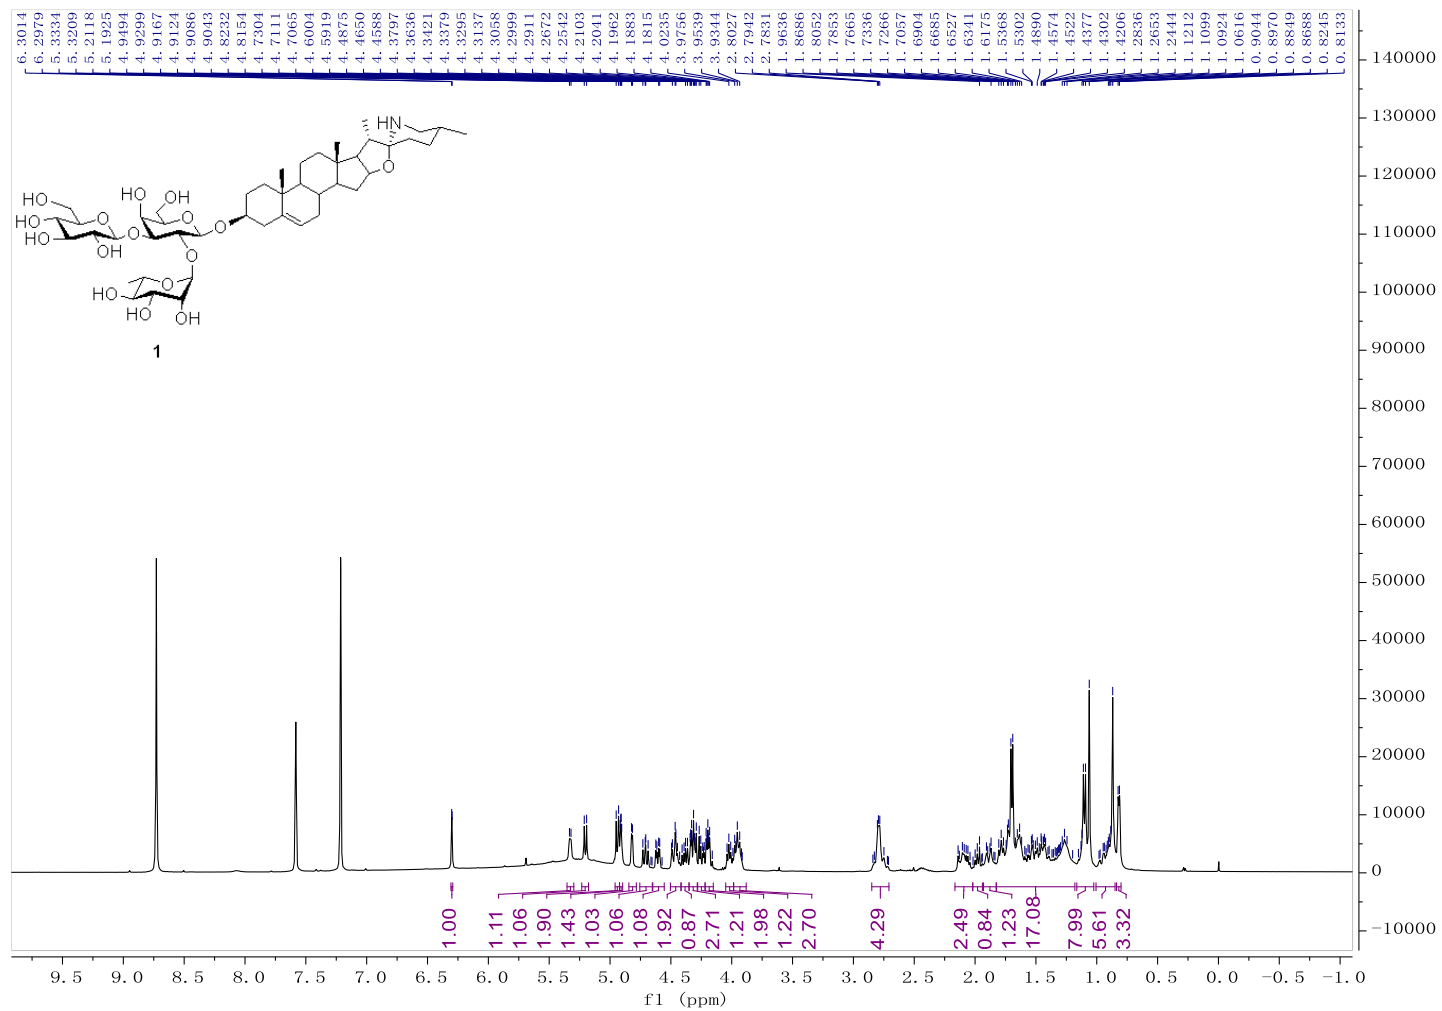

$^{13}\text{C}$  spectrum of compound **1** (150 MHz, pyridine- $d_5$ )

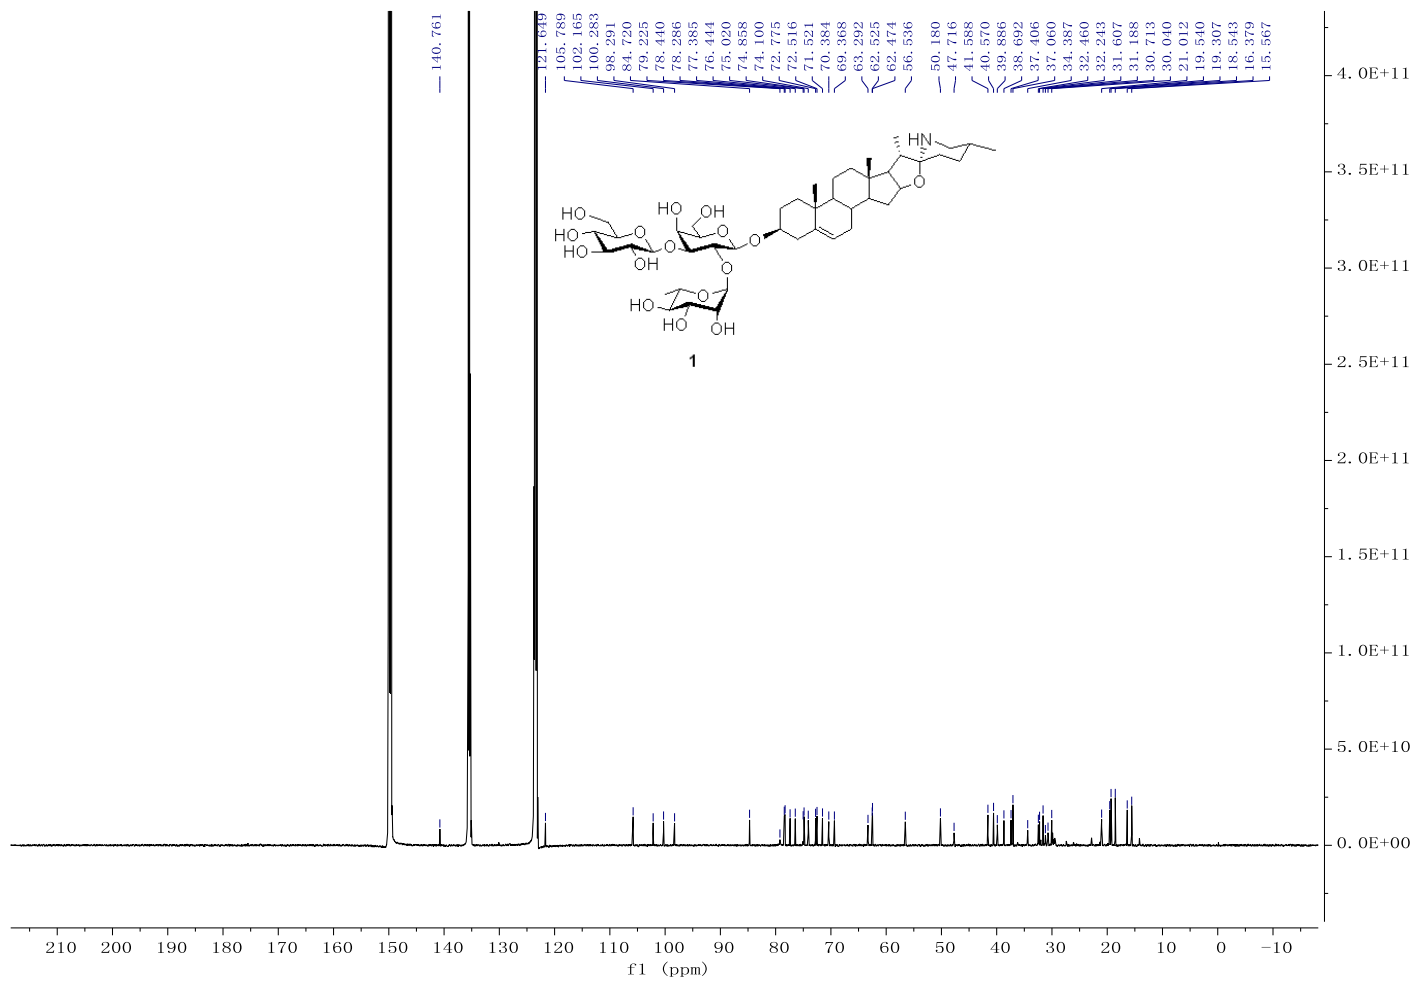

<sup>1</sup>H spectrum of compound **15** (400 MHz, CDCl<sub>3</sub>)

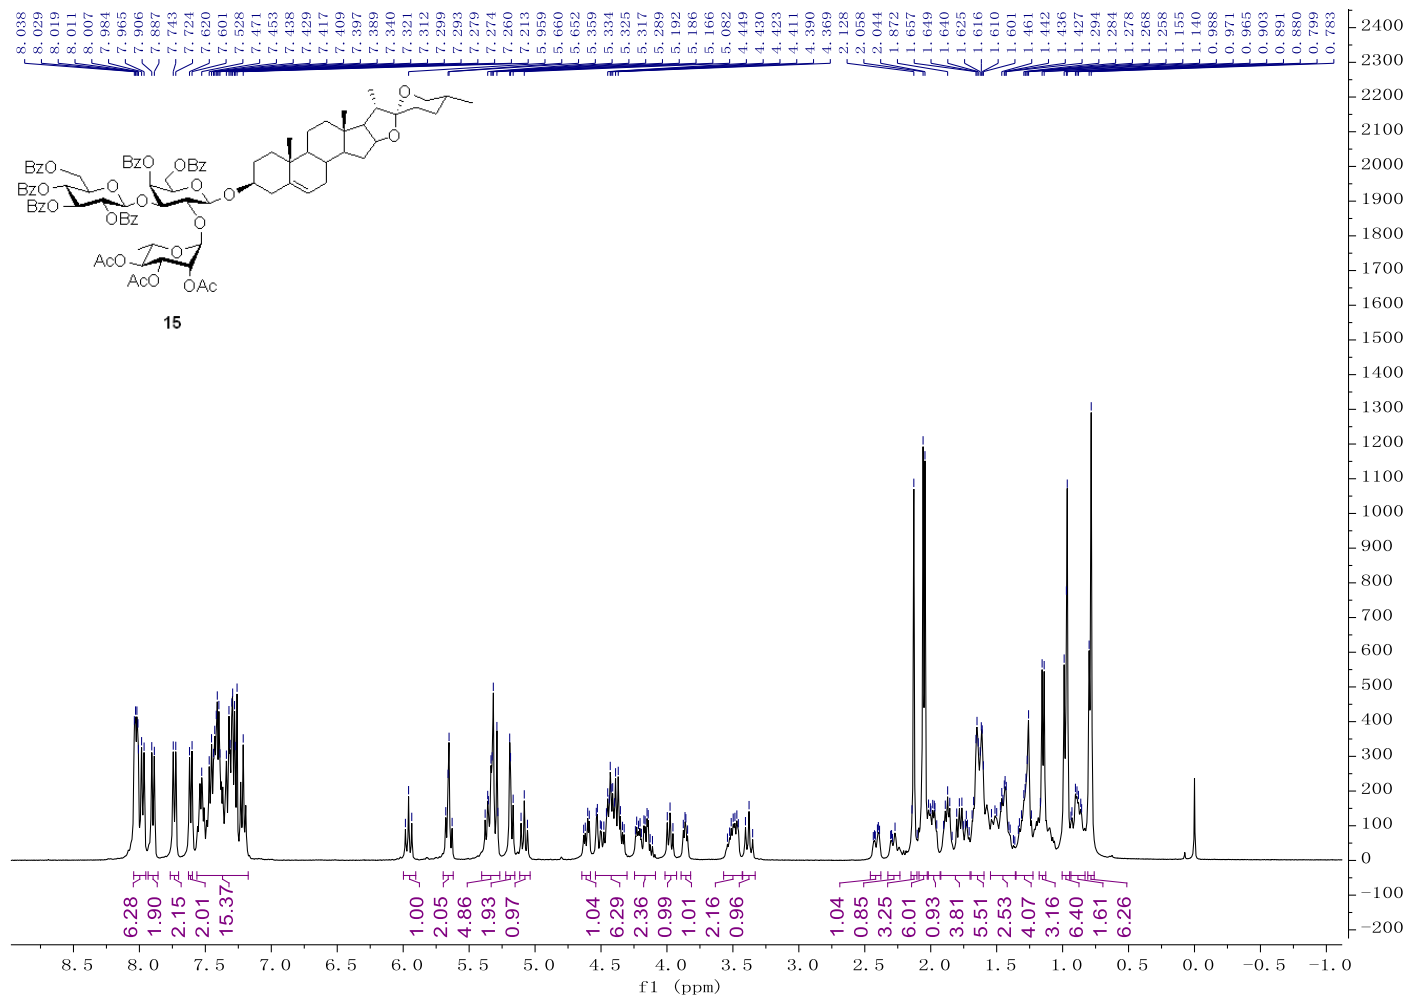

$^1\text{H}$ - $^1\text{H}$  COSY of compound **15**

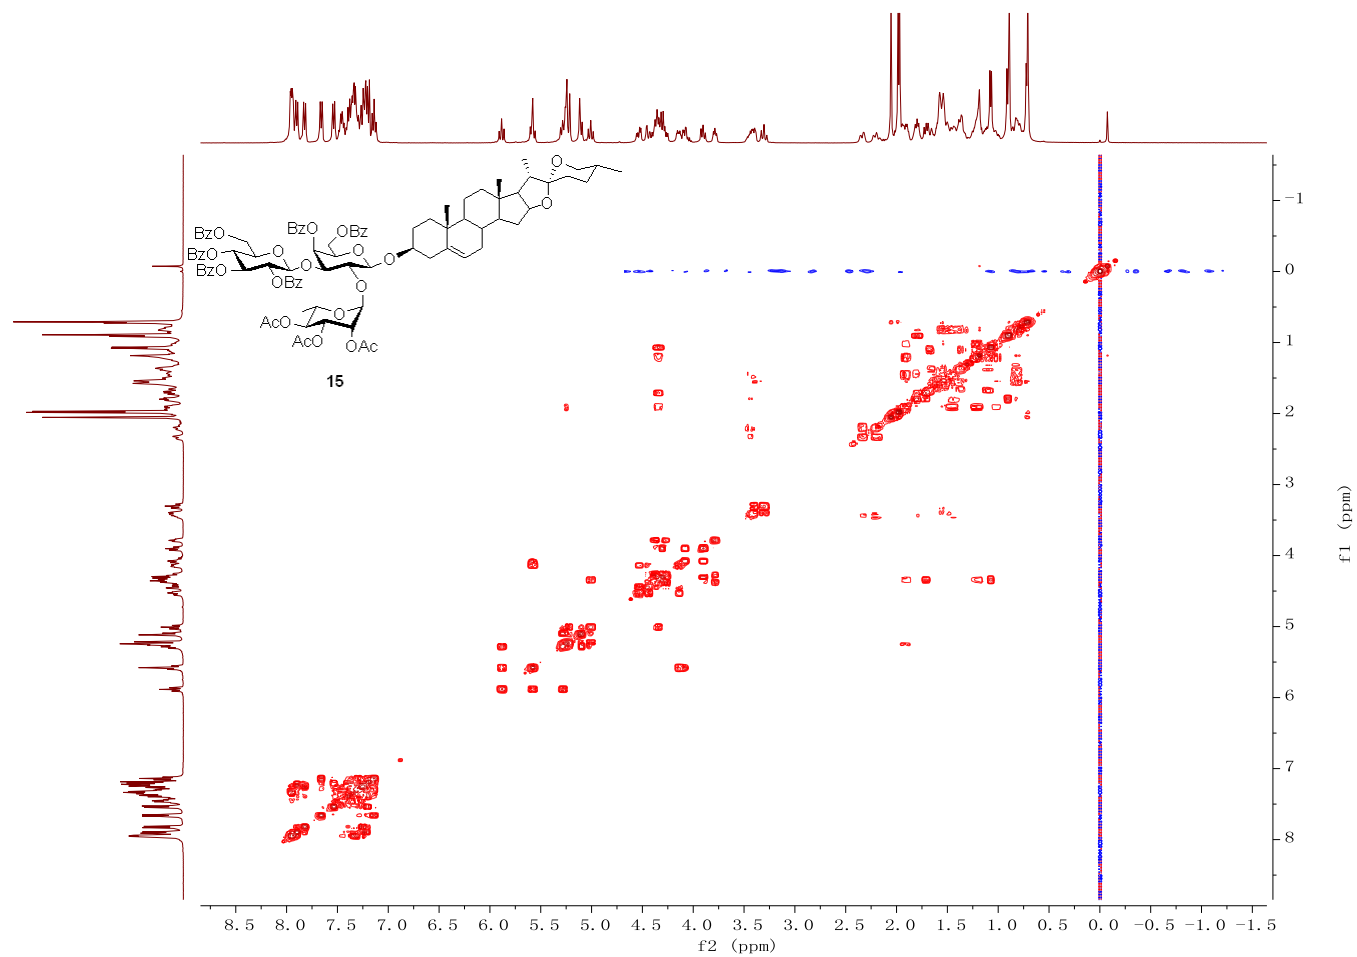

# HSQC of compound 15

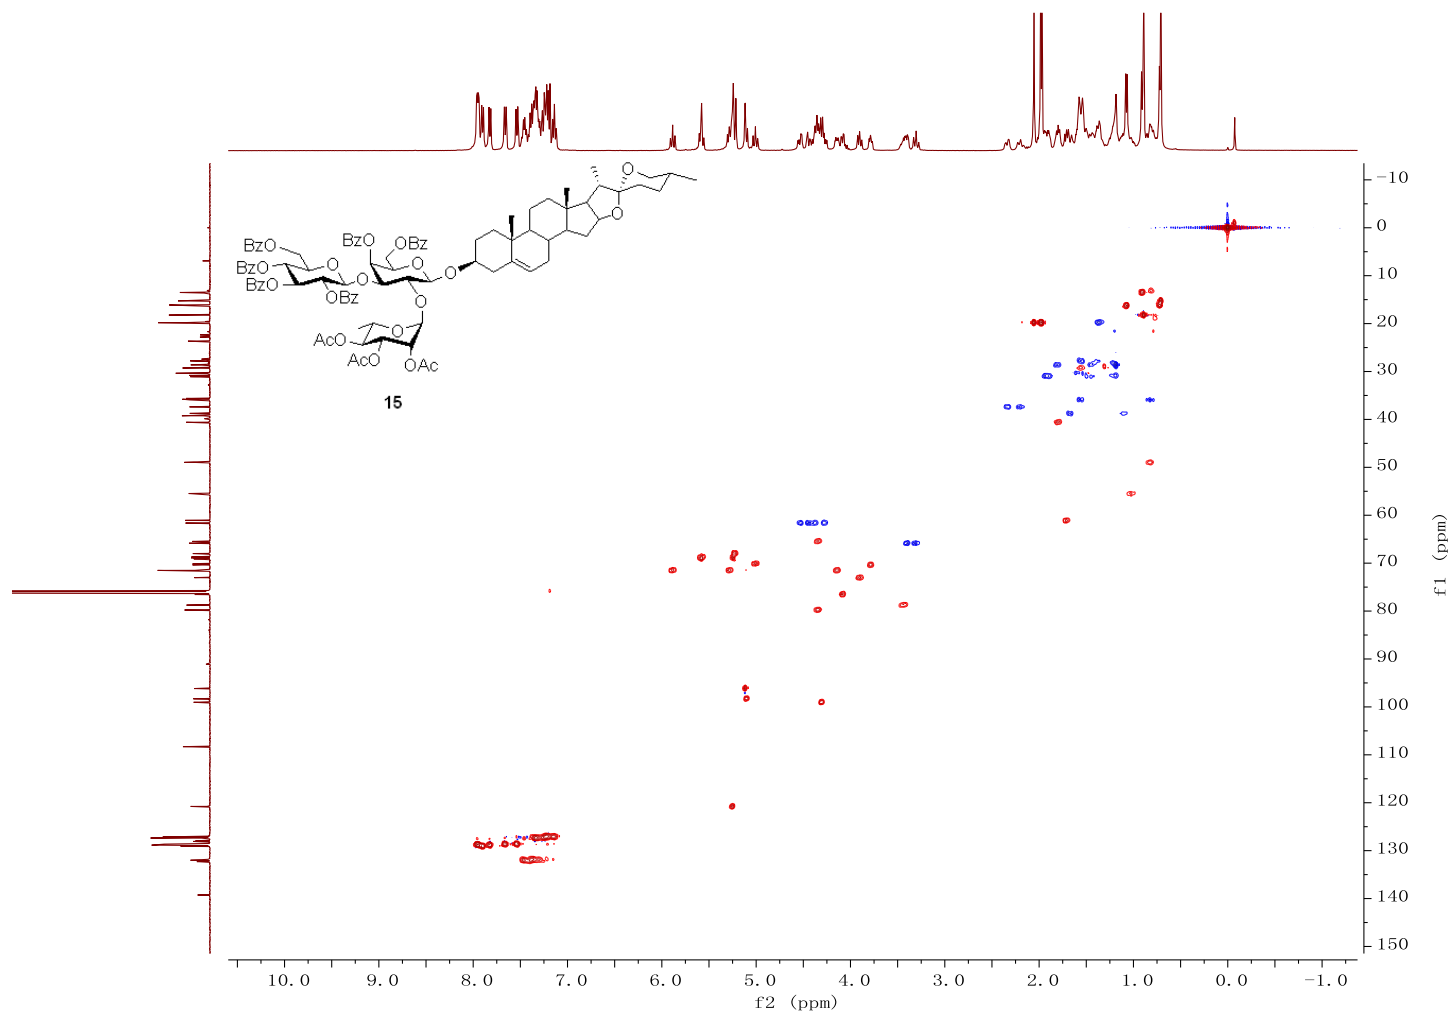

$^{13}\text{C}$  spectrum of compound **15** (150 MHz,  $\text{CDCl}_3$ )

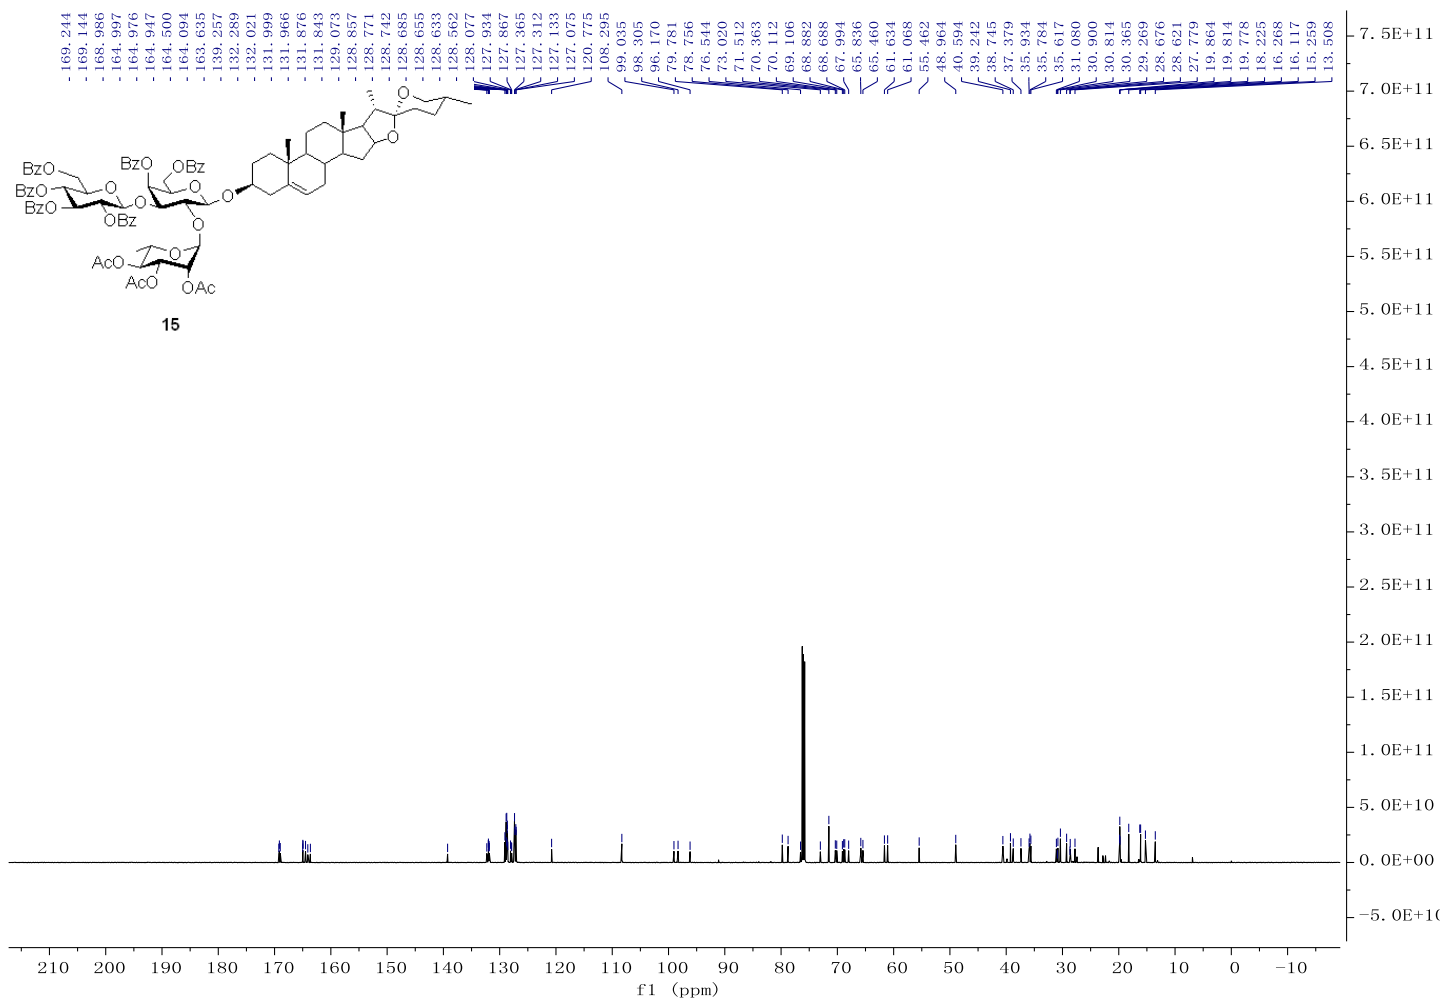

<sup>1</sup>H spectrum of compound 2 (400 MHz, pyridine-d<sub>5</sub>)

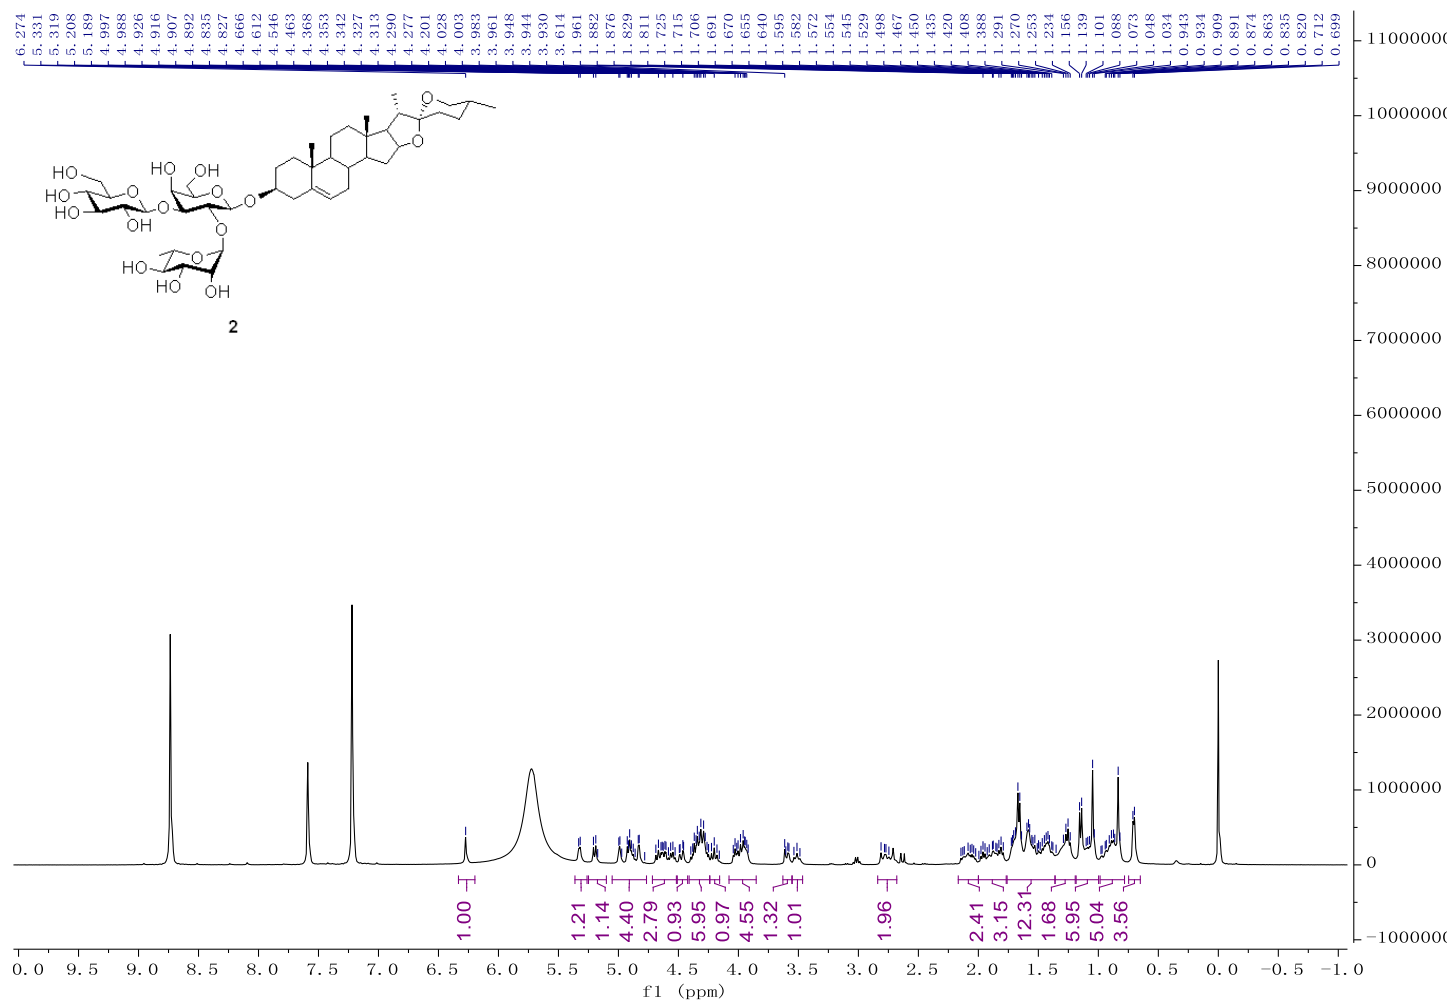

$^{13}\text{C}$  spectrum of compound **2** (100 MHz, pyridine- $d_5$ )

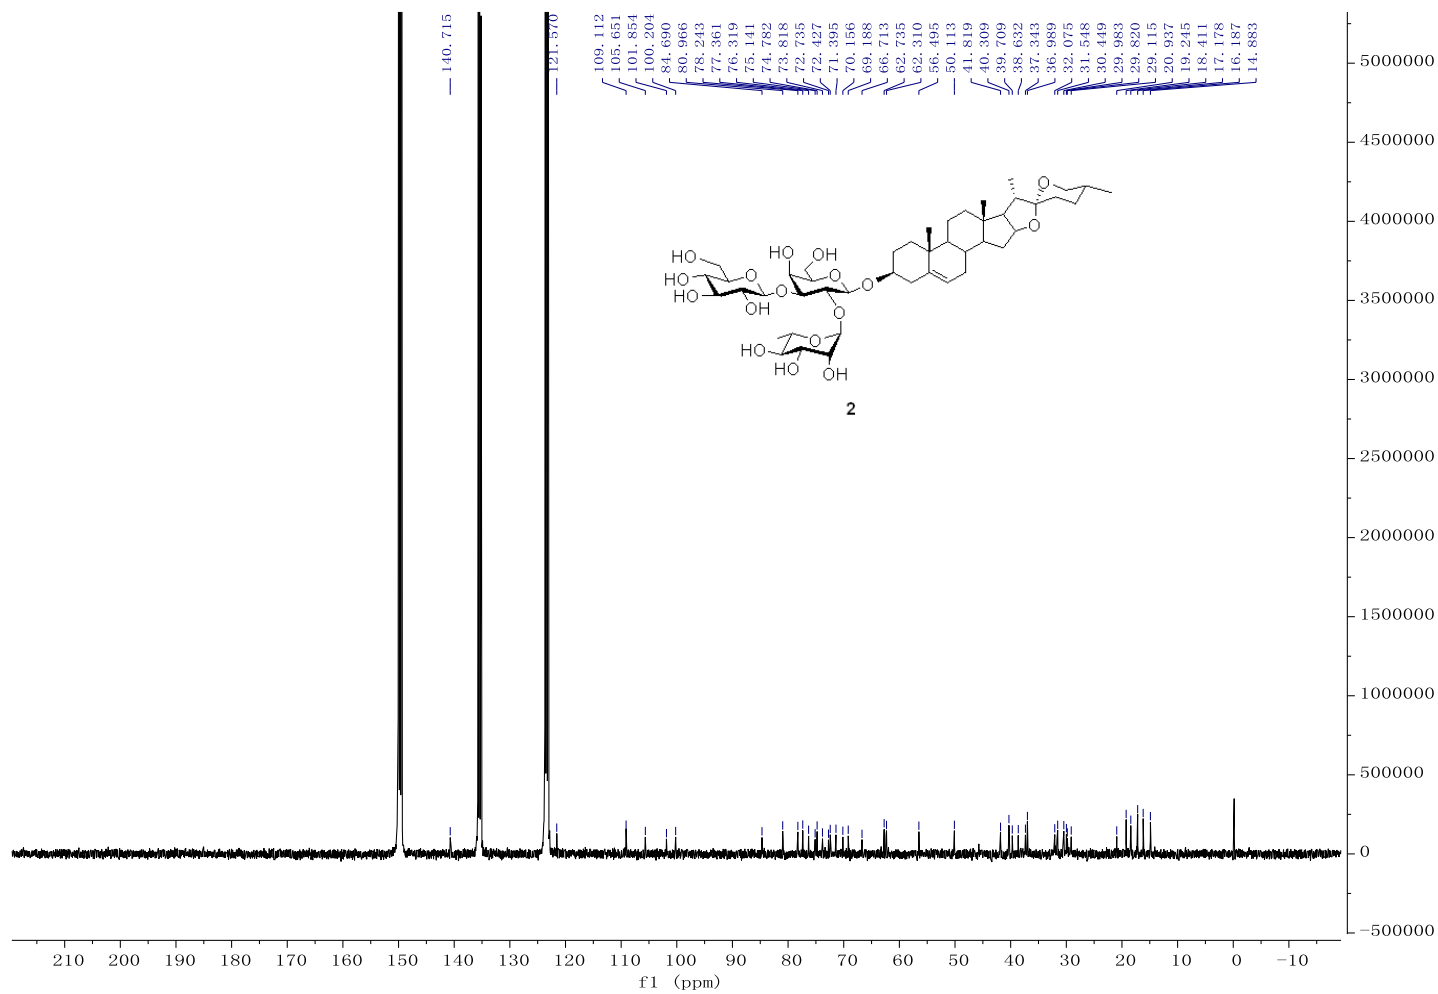

Supplement: d4cc01850h1.pdf [file d4cc01850h1.pdf]
